# Supplementary material for: SRF Rearrangements in Soft Tissue Tumors with Muscle Differentiation
Source: MDPI journal article supplement (doi:10.3390/biom12111678), 2022-11-12
Supplement: s1 [file s1]

**Supplementary Table S1. Differentially expressed genes between *SRF::E2F1*-transfected cells and controls (logFC=log2 fold change; logCPM=log2 counts/million).**

| GENE SYMBOL | logFC | logCPM | PValue   | GENE ID         |
|-------------|-------|--------|----------|-----------------|
| EGR1        | 4,99  | 7,08   | 1,49E-12 | ENSG00000120738 |
| EGR4        | 10,31 | 3,94   | 4,56E-10 | ENSG00000135625 |
| SRF         | 3,79  | 8,85   | 1,79E-09 | ENSG00000112658 |
| RPE65       | 10,54 | 3,46   | 2,04E-09 | ENSG00000116745 |
| KRT17       | 6,58  | 3,96   | 1,25E-08 | ENSG00000128422 |
| TCHH        | 7,63  | 3,76   | 1,69E-08 | ENSG00000159450 |
| A2M         | 8,23  | 5,40   | 6,98E-08 | ENSG00000175899 |
| HSH2D       | 8,05  | 2,34   | 2,19E-07 | ENSG00000196684 |
| GBA3        | 9,72  | 1,25   | 7,81E-07 | ENSG00000249948 |
| TAGLN       | 5,22  | 6,29   | 1,18E-06 | ENSG00000149591 |
| HJV         | 9,65  | 1,18   | 1,26E-06 | ENSG00000168509 |
| WFDC12      | 9,00  | 0,57   | 2,59E-06 | ENSG00000168703 |
| ACTA2       | 3,32  | 6,08   | 3,24E-06 | ENSG00000107796 |
| XIRP1       | 8,11  | 1,10   | 3,54E-06 | ENSG00000168334 |
| ASPA        | 7,49  | 2,90   | 4,49E-06 | ENSG00000108381 |
| JAML        | 7,53  | 1,25   | 4,77E-06 | ENSG00000160593 |
| GPR183      | 7,72  | 2,12   | 5,07E-06 | ENSG00000169508 |
| E2F1        | 2,93  | 7,73   | 5,62E-06 | ENSG00000101412 |
| ACTG2       | 7,17  | 1,75   | 6,33E-06 | ENSG00000163017 |
| FMO3        | 8,97  | 0,55   | 6,52E-06 | ENSG00000007933 |
| KRT12       | 9,51  | 1,05   | 6,77E-06 | ENSG00000187242 |
| OPALIN      | 9,12  | 0,69   | 7,71E-06 | ENSG00000197430 |
| DNAJA4      | 7,87  | 1,05   | 8,09E-06 | ENSG00000140403 |
| ACTC1       | 7,83  | 1,90   | 9,71E-06 | ENSG00000159251 |
| AC079313.2  | 7,85  | -0,44  | 1,11E-05 | ENSG00000258137 |
| KRT9        | 7,73  | -0,55  | 1,28E-05 | ENSG00000171403 |
| C1orf194    | 7,85  | -0,44  | 1,30E-05 | ENSG00000179902 |
| FRG2FP      | 7,19  | 1,48   | 1,53E-05 | ENSG00000232783 |
| PRSS58      | 7,34  | 1,07   | 1,64E-05 | ENSG00000258223 |
| MYL1        | 7,27  | 1,49   | 2,21E-05 | ENSG00000168530 |
| GLYATL1P1   | 7,59  | -0,66  | 2,28E-05 | ENSG00000255189 |
| AL596330.1  | 7,55  | -0,69  | 2,31E-05 | ENSG00000229400 |
| DNAJA1P5    | 7,70  | -0,57  | 2,32E-05 | ENSG00000162699 |
| TNMD        | 7,67  | 3,00   | 3,16E-05 | ENSG00000000005 |
| AP000892.3  | 6,84  | 2,80   | 3,39E-05 | ENSG00000280143 |
| MB          | 7,50  | -0,73  | 3,79E-05 | ENSG00000198125 |
| TDRD9       | 7,83  | -0,46  | 4,43E-05 | ENSG00000156414 |
| AC008074.2  | 5,11  | 2,45   | 4,83E-05 | ENSG00000260101 |
| AL160171.1  | 7,63  | -0,63  | 5,07E-05 | ENSG00000285923 |
| TLR7        | 5,47  | -0,16  | 5,22E-05 | ENSG00000196664 |
| A1CF        | 6,51  | 0,26   | 5,25E-05 | ENSG00000148584 |
| KRT85       | 8,21  | -0,13  | 5,40E-05 | ENSG00000135443 |
| ITIH3       | 6,19  | 0,95   | 5,75E-05 | ENSG00000162267 |
| MYH6        | 8,06  | -0,27  | 6,28E-05 | ENSG00000197616 |
| LRRC19      | 7,63  | -0,63  | 6,37E-05 | ENSG00000184434 |
| TLR8-AS1    | 7,95  | -0,36  | 6,59E-05 | ENSG00000233338 |
| AL513321.2  | 6,89  | -1,20  | 8,48E-05 | ENSG00000282906 |
| IL33        | 5,70  | 4,39   | 9,22E-05 | ENSG00000137033 |
| EGR2        | 4,97  | 2,36   | 9,83E-05 | ENSG00000122877 |
| ROS1        | 5,37  | 0,61   | 1,01E-04 | ENSG00000047936 |
| ITLN2       | 7,44  | -0,78  | 1,02E-04 | ENSG00000158764 |
| ATP1B4      | 6,91  | 0,00   | 1,20E-04 | ENSG00000101892 |
| MYL7        | 6,02  | -0,70  | 1,37E-04 | ENSG00000106631 |
| LINC02153   | 6,63  | -1,38  | 1,37E-04 | ENSG00000253199 |
| FRMD7       | 6,26  | -0,51  | 1,40E-04 | ENSG00000165694 |
| AL807740.1  | 6,77  | -1,28  | 1,40E-04 | ENSG00000283400 |
| GRM1        | 5,18  | 1,62   | 1,41E-04 | ENSG00000152822 |
| IGSF22      | 5,30  | -0,29  | 1,47E-04 | ENSG00000179057 |
| VCAM1       | 7,17  | -0,99  | 1,55E-04 | ENSG00000162692 |
| PLN         | 7,33  | 2,11   | 1,69E-04 | ENSG00000198523 |

|            |      |       |          |                 |
|------------|------|-------|----------|-----------------|
| TBATA      | 5,76 | -0,94 | 1,82E-04 | ENSG00000166220 |
| CHRM1      | 6,48 | -1,48 | 1,92E-04 | ENSG00000168539 |
| LINC01010  | 6,83 | -0,08 | 1,92E-04 | ENSG00000236700 |
| LMNTD1     | 5,43 | 0,14  | 1,97E-04 | ENSG00000152936 |
| NPPB       | 6,48 | -1,48 | 2,05E-04 | ENSG00000120937 |
| CD52       | 5,75 | -0,89 | 2,06E-04 | ENSG00000169442 |
| CXCL11     | 5,37 | 5,42  | 2,59E-04 | ENSG00000169248 |
| OPN5       | 4,78 | -0,68 | 2,63E-04 | ENSG00000124818 |
| CEACAM21   | 6,39 | -1,54 | 2,64E-04 | ENSG00000007129 |
| TRPC7      | 6,31 | -1,59 | 2,67E-04 | ENSG00000069018 |
| ARC        | 4,19 | 4,41  | 2,85E-04 | ENSG00000198576 |
| KRT1       | 5,70 | -0,98 | 3,10E-04 | ENSG00000167768 |
| TRDN       | 4,98 | -0,98 | 3,36E-04 | ENSG00000186439 |
| CARMN      | 6,22 | -1,65 | 3,38E-04 | ENSG00000249669 |
| PZP        | 6,31 | -1,59 | 3,50E-04 | ENSG00000126838 |
| ATP13A4    | 5,31 | -1,26 | 4,21E-04 | ENSG00000127249 |
| HEPHL1     | 6,31 | -1,59 | 4,32E-04 | ENSG00000181333 |
| GP5        | 4,87 | -1,06 | 4,40E-04 | ENSG00000178732 |
| EIF4A1P9   | 5,49 | -1,08 | 4,85E-04 | ENSG00000262953 |
| C9orf84    | 4,53 | -1,27 | 4,88E-04 | ENSG00000165181 |
| ERG        | 5,83 | 2,39  | 5,00E-04 | ENSG00000157554 |
| COL1A2     | 5,33 | -0,18 | 5,08E-04 | ENSG00000164692 |
| AC091152.4 | 4,34 | 1,84  | 5,26E-04 | ENSG00000279879 |
| KLHL10     | 5,32 | 1,70  | 5,36E-04 | ENSG00000161594 |
| C9         | 6,12 | -1,71 | 5,39E-04 | ENSG00000113600 |
| AC083949.1 | 4,46 | -0,60 | 6,03E-04 | ENSG00000224875 |
| AL355607.2 | 6,08 | 2,60  | 6,10E-04 | ENSG00000260454 |
| C11orf16   | 6,12 | -1,71 | 6,20E-04 | ENSG00000176029 |
| MCF2       | 4,47 | 2,54  | 6,37E-04 | ENSG00000101977 |
| FAM71F1    | 5,41 | 0,35  | 6,55E-04 | ENSG00000135248 |
| RDH8       | 5,24 | -1,25 | 7,37E-04 | ENSG00000080511 |
| LINC02244  | 5,24 | -1,31 | 7,71E-04 | ENSG00000259590 |
| AC103760.1 | 4,35 | 0,59  | 7,87E-04 | ENSG00000254231 |
| TGM3       | 5,38 | -1,16 | 7,89E-04 | ENSG00000125780 |
| AC074131.1 | 6,21 | -1,65 | 8,01E-04 | ENSG00000250831 |
| MYOZ2      | 4,69 | -0,18 | 8,22E-04 | ENSG00000172399 |
| AL391335.1 | 5,04 | -0,87 | 8,71E-04 | ENSG00000250734 |
| SLC16A6    | 3,73 | 3,22  | 8,89E-04 | ENSG00000108932 |
| TNIP3      | 4,91 | 1,22  | 9,44E-04 | ENSG00000050730 |
| LRRC53     | 5,90 | -1,83 | 9,50E-04 | ENSG00000162621 |
| KIAA1210   | 4,56 | -1,28 | 1,02E-03 | ENSG00000250423 |
| ALOX5AP    | 4,13 | -1,15 | 1,07E-03 | ENSG00000132965 |
| CNN1       | 4,82 | 0,04  | 1,09E-03 | ENSG00000130176 |
| NCAM2      | 5,32 | -1,20 | 1,10E-03 | ENSG00000154654 |
| PCDHB17P   | 4,90 | -1,49 | 1,12E-03 | ENSG00000255622 |
| FCGR3A     | 6,02 | -1,77 | 1,15E-03 | ENSG00000203747 |
| COL11A1    | 4,12 | -0,02 | 1,16E-03 | ENSG00000060718 |
| KRT14      | 5,17 | -1,35 | 1,19E-03 | ENSG00000186847 |
| KCNMB1     | 5,78 | -1,90 | 1,27E-03 | ENSG00000145936 |
| LINC02599  | 4,85 | -1,56 | 1,27E-03 | ENSG00000233858 |
| AOX2P      | 5,21 | -1,30 | 1,29E-03 | ENSG00000243478 |
| AC009812.2 | 5,78 | -1,90 | 1,40E-03 | ENSG00000253760 |
| LGI1       | 4,79 | 0,18  | 1,49E-03 | ENSG00000108231 |
| SPATA31E1  | 4,99 | -1,44 | 1,49E-03 | ENSG00000177992 |
| FYB2       | 4,72 | -1,61 | 1,55E-03 | ENSG00000187889 |
| AC119674.1 | 5,64 | -1,97 | 1,68E-03 | ENSG00000260971 |
| CRYAB      | 4,43 | -1,36 | 1,68E-03 | ENSG00000109846 |
| LCP2       | 5,01 | 0,59  | 1,73E-03 | ENSG00000043462 |
| CXCL10     | 4,85 | 2,35  | 1,82E-03 | ENSG00000169245 |
| BOLL       | 4,51 | -1,26 | 1,87E-03 | ENSG00000152430 |
| CD36       | 5,64 | 2,31  | 1,91E-03 | ENSG00000135218 |
| GABRR1     | 5,20 | -0,05 | 1,95E-03 | ENSG00000146276 |
| TMIGD3     | 4,41 | -1,25 | 1,98E-03 | ENSG00000121933 |
| TPH1       | 4,08 | 1,88  | 1,99E-03 | ENSG00000129167 |

|            |      |       |          |                 |
|------------|------|-------|----------|-----------------|
| ENDOU      | 5,16 | 1,64  | 2,02E-03 | ENSG00000111405 |
| AL359762.1 | 4,30 | -0,28 | 2,07E-03 | ENSG00000284882 |
| CCL22      | 5,65 | -1,97 | 2,09E-03 | ENSG00000102962 |
| AC080080.1 | 3,75 | 1,51  | 2,12E-03 | ENSG00000279048 |
| FER1L6     | 4,46 | 0,08  | 2,14E-03 | ENSG00000214814 |
| TRIM54     | 4,06 | 0,46  | 2,14E-03 | ENSG00000138100 |
| CASQ1      | 4,23 | -0,13 | 2,19E-03 | ENSG00000143318 |
| AC245297.1 | 4,03 | -0,21 | 2,22E-03 | ENSG00000215861 |
| GALNT15    | 4,52 | 0,25  | 2,31E-03 | ENSG00000131386 |
| TG         | 3,49 | -1,08 | 2,37E-03 | ENSG00000042832 |
| SLC44A4    | 4,66 | -1,67 | 2,44E-03 | ENSG00000204385 |
| CMKLR1     | 4,63 | -1,66 | 2,55E-03 | ENSG00000174600 |
| DEC1       | 3,91 | -1,26 | 2,76E-03 | ENSG00000173077 |
| MYL4       | 3,87 | -0,54 | 2,90E-03 | ENSG00000198336 |
| BSND       | 4,60 | -1,66 | 3,22E-03 | ENSG00000162399 |
| CERKL      | 4,48 | 0,34  | 3,25E-03 | ENSG00000188452 |
| AC026310.2 | 3,79 | -0,78 | 3,29E-03 | ENSG00000255921 |
| SLC22A10   | 5,49 | -2,05 | 3,45E-03 | ENSG00000184999 |
| AL136979.1 | 5,49 | -2,05 | 3,47E-03 | ENSG00000227914 |
| OR52N2     | 5,49 | -2,05 | 3,47E-03 | ENSG00000180988 |
| AC092818.1 | 4,04 | -0,01 | 3,56E-03 | ENSG00000254038 |
| MYOZ1      | 4,26 | 0,38  | 3,71E-03 | ENSG00000177791 |
| DNAI1      | 3,49 | -0,22 | 3,71E-03 | ENSG00000122735 |
| KCNK3      | 4,67 | -1,67 | 3,85E-03 | ENSG00000171303 |
| DIRC3      | 4,50 | 1,21  | 3,86E-03 | ENSG00000231672 |
| AC233724.5 | 5,50 | -2,05 | 3,88E-03 | ENSG00000248542 |
| AC084816.1 | 3,87 | -1,26 | 3,96E-03 | ENSG00000256995 |
| DNAH12     | 5,03 | 0,88  | 4,64E-03 | ENSG00000174844 |
| LINC01556  | 3,68 | -1,48 | 4,80E-03 | ENSG00000204709 |
| GRM3       | 3,79 | -1,37 | 4,91E-03 | ENSG00000198822 |
| COL5A3     | 3,90 | -0,47 | 5,05E-03 | ENSG00000080573 |
| LDB3       | 3,28 | -0,11 | 5,08E-03 | ENSG00000122367 |
| ZEB2-AS1   | 4,07 | -1,50 | 5,14E-03 | ENSG00000238057 |
| PTGS1      | 3,80 | 0,29  | 5,21E-03 | ENSG00000095303 |
| NT5E       | 3,62 | 1,77  | 5,28E-03 | ENSG00000135318 |
| LIMS2      | 3,50 | 0,84  | 5,40E-03 | ENSG00000072163 |
| TEX41      | 5,33 | -2,13 | 5,40E-03 | ENSG00000226674 |
| AC099329.2 | 4,44 | -1,79 | 5,41E-03 | ENSG00000273328 |
| ADAM5      | 5,33 | -2,12 | 5,43E-03 | ENSG00000196115 |
| AL139125.2 | 3,90 | -1,38 | 5,48E-03 | ENSG00000278982 |
| AIF1       | 4,45 | -1,79 | 5,49E-03 | ENSG00000204472 |
| FSD2       | 4,27 | -0,78 | 5,68E-03 | ENSG00000186628 |
| LCN1       | 4,03 | -1,23 | 5,70E-03 | ENSG00000160349 |
| PLCXD3     | 4,21 | 0,96  | 5,76E-03 | ENSG00000182836 |
| THSD7B     | 4,19 | -1,83 | 5,89E-03 | ENSG00000144229 |
| CD74       | 3,58 | 0,10  | 6,03E-03 | ENSG00000019582 |
| MYH11      | 3,88 | -0,82 | 6,31E-03 | ENSG00000133392 |
| AC243571.2 | 3,70 | -1,29 | 6,69E-03 | ENSG00000277501 |
| SEPT7P9    | 4,27 | -1,85 | 6,85E-03 | ENSG00000120555 |
| ADAMTS4    | 3,87 | 0,96  | 6,87E-03 | ENSG00000158859 |
| C1orf61    | 4,16 | 1,10  | 6,90E-03 | ENSG00000125462 |
| OOSP3      | 4,07 | -1,50 | 6,90E-03 | ENSG00000285231 |
| PRKCG      | 4,30 | 1,61  | 7,02E-03 | ENSG00000126583 |
| TEKT5      | 3,44 | -0,82 | 7,15E-03 | ENSG00000153060 |
| MTMR7      | 3,70 | 3,81  | 7,38E-03 | ENSG00000003987 |
| EXOC3L2    | 3,67 | -0,50 | 7,57E-03 | ENSG00000283632 |
| CMAHP      | 4,45 | 2,41  | 7,63E-03 | ENSG00000168405 |
| SHD        | 4,32 | 0,02  | 7,66E-03 | ENSG00000105251 |
| AL390037.1 | 3,83 | -1,60 | 7,68E-03 | ENSG00000277901 |
| LINC00923  | 5,14 | -2,21 | 8,04E-03 | ENSG00000251209 |
| CALHM4     | 5,14 | -2,21 | 8,05E-03 | ENSG00000164451 |
| RHOXF1-AS1 | 5,14 | -2,21 | 8,05E-03 | ENSG00000258545 |
| AP003472.1 | 5,14 | -2,21 | 8,07E-03 | ENSG00000253824 |
| AC126178.1 | 5,14 | -2,21 | 8,08E-03 | ENSG00000257194 |

|            |      |       |          |                 |
|------------|------|-------|----------|-----------------|
| IFI44L     | 3,28 | 2,70  | 8,30E-03 | ENSG00000137959 |
| TYRP1      | 3,99 | -0,44 | 8,39E-03 | ENSG00000107165 |
| EGF        | 3,15 | 2,77  | 8,42E-03 | ENSG00000138798 |
| GRIN2B     | 3,83 | -1,68 | 8,73E-03 | ENSG00000273079 |
| KLHL41     | 3,81 | 0,54  | 1,00E-02 | ENSG00000239474 |
| OR52K3P    | 3,53 | -0,17 | 1,02E-02 | ENSG00000225101 |
| A2MP1      | 3,25 | -1,50 | 1,05E-02 | ENSG00000256069 |
| AC006994.2 | 4,49 | -0,58 | 1,07E-02 | ENSG00000279317 |
| TUBB8P8    | 3,88 | -1,61 | 1,09E-02 | ENSG00000213113 |
| METTL11B   | 3,97 | -0,01 | 1,10E-02 | ENSG00000203740 |
| TESPA1     | 3,62 | -1,72 | 1,12E-02 | ENSG00000135426 |
| GPA33      | 4,38 | 0,82  | 1,13E-02 | ENSG00000143167 |
| CES1P2     | 5,16 | -0,08 | 1,15E-02 | ENSG00000260765 |
| CASS4      | 3,43 | 1,10  | 1,19E-02 | ENSG00000087589 |
| FHL5       | 3,43 | -1,12 | 1,20E-02 | ENSG00000112214 |
| AL033527.2 | 3,45 | -1,39 | 1,22E-02 | ENSG00000236546 |
| FOXS1      | 3,50 | -0,75 | 1,23E-02 | ENSG00000179772 |
| DLG2       | 2,90 | 1,50  | 1,25E-02 | ENSG00000150672 |
| CRAT37     | 4,92 | -2,29 | 1,25E-02 | ENSG00000258551 |
| TIMD4      | 4,92 | -2,29 | 1,25E-02 | ENSG00000145850 |
| DAOA-AS1   | 4,92 | -2,29 | 1,25E-02 | ENSG00000232307 |
| AL356108.1 | 4,92 | -2,29 | 1,26E-02 | ENSG00000236230 |
| AC068205.1 | 4,92 | -2,29 | 1,26E-02 | ENSG00000283217 |
| ANKUB1     | 3,61 | -1,46 | 1,26E-02 | ENSG00000206199 |
| PKHD1      | 4,00 | -1,42 | 1,31E-02 | ENSG00000170927 |
| AC092919.1 | 3,69 | -1,74 | 1,35E-02 | ENSG00000240497 |
| JCHAIN     | 3,25 | -1,70 | 1,37E-02 | ENSG00000132465 |
| KCNIP2-AS1 | 2,77 | -1,02 | 1,40E-02 | ENSG00000226009 |
| NPHP3-AS1  | 3,09 | -0,69 | 1,40E-02 | ENSG00000248724 |
| HNRNPA1P11 | 3,48 | -1,78 | 1,41E-02 | ENSG00000264315 |
| AC004990.1 | 3,80 | -1,68 | 1,42E-02 | ENSG00000232756 |
| BANK1      | 4,03 | -2,00 | 1,46E-02 | ENSG00000153064 |
| CARD16     | 3,70 | -1,74 | 1,46E-02 | ENSG00000204397 |
| AKR1B15    | 3,33 | -1,63 | 1,48E-02 | ENSG00000227471 |
| AC090515.2 | 2,82 | -0,31 | 1,50E-02 | ENSG00000245975 |
| ADNP-AS1   | 2,90 | 1,00  | 1,53E-02 | ENSG00000259456 |
| AL442663.3 | 2,97 | 1,21  | 1,53E-02 | ENSG00000258813 |
| APOE       | 3,42 | 2,79  | 1,55E-02 | ENSG00000130203 |
| AL596220.1 | 3,36 | -0,97 | 1,55E-02 | ENSG00000229739 |
| NECAB1     | 3,01 | -0,79 | 1,55E-02 | ENSG00000123119 |
| SLC6A12    | 3,07 | -0,55 | 1,62E-02 | ENSG00000111181 |
| RPL7P38    | 3,07 | -1,45 | 1,65E-02 | ENSG00000239473 |
| HOMER1     | 1,52 | 6,13  | 1,66E-02 | ENSG00000152413 |
| MALINC1    | 2,63 | 2,96  | 1,67E-02 | ENSG00000245146 |
| TRIM55     | 3,13 | 0,43  | 1,68E-02 | ENSG00000147573 |
| SLC12A8    | 3,45 | 2,45  | 1,70E-02 | ENSG00000221955 |
| OTOGL      | 2,67 | -0,82 | 1,71E-02 | ENSG00000165899 |
| GZMA       | 4,01 | 1,32  | 1,73E-02 | ENSG00000145649 |
| ITK        | 3,21 | -1,41 | 1,73E-02 | ENSG00000113263 |
| GJC3       | 3,19 | 0,60  | 1,74E-02 | ENSG00000176402 |
| LINC02392  | 4,82 | 2,18  | 1,76E-02 | ENSG00000258183 |
| FOSB       | 2,65 | 2,64  | 1,78E-02 | ENSG00000125740 |
| CCDC190    | 3,66 | 0,39  | 1,87E-02 | ENSG00000185860 |
| LINC02228  | 2,72 | -0,14 | 1,92E-02 | ENSG00000251273 |
| C6orf163   | 3,21 | 0,73  | 1,93E-02 | ENSG00000203872 |
| ABCA4      | 2,84 | -0,55 | 1,97E-02 | ENSG00000198691 |
| USH2A      | 3,16 | -0,66 | 1,97E-02 | ENSG00000042781 |
| IMPDH1P10  | 3,60 | 1,28  | 2,01E-02 | ENSG00000232133 |
| C3orf38    | 1,40 | 6,34  | 2,06E-02 | ENSG00000179021 |
| TSPAN19    | 2,78 | 1,68  | 2,09E-02 | ENSG00000231738 |
| ALDH1A1    | 2,76 | -0,26 | 2,11E-02 | ENSG00000165092 |
| AC010834.2 | 2,97 | -1,81 | 2,12E-02 | ENSG00000253848 |
| ABCD2      | 3,17 | 2,07  | 2,13E-02 | ENSG00000173208 |
| AC105339.3 | 3,74 | -2,04 | 2,18E-02 | ENSG00000259442 |

|            |       |       |          |                 |
|------------|-------|-------|----------|-----------------|
| LINC00907  | 3,74  | -2,04 | 2,18E-02 | ENSG00000267586 |
| RERGL      | 3,21  | -1,41 | 2,19E-02 | ENSG00000111404 |
| AC100803.2 | 2,95  | -1,33 | 2,19E-02 | ENSG00000261655 |
| CCDC81     | 3,07  | 0,71  | 2,20E-02 | ENSG00000149201 |
| FILIP1L    | 3,93  | 3,16  | 2,22E-02 | ENSG00000168386 |
| FLG        | 3,21  | 1,59  | 2,28E-02 | ENSG00000143631 |
| GRIN2A     | 2,97  | -1,59 | 2,30E-02 | ENSG00000183454 |
| LRTM2      | 3,40  | -1,57 | 2,38E-02 | ENSG00000166159 |
| PTGS2      | 2,52  | 2,65  | 2,39E-02 | ENSG00000073756 |
| AC087482.1 | 2,68  | -0,65 | 2,45E-02 | ENSG00000259347 |
| MYO7B      | 3,43  | -1,87 | 2,51E-02 | ENSG00000169994 |
| ENTPD1     | 2,66  | -0,73 | 2,61E-02 | ENSG00000138185 |
| AC090197.1 | 3,06  | -1,65 | 2,62E-02 | ENSG00000253837 |
| PDZPH1P    | 2,90  | -1,57 | 2,62E-02 | ENSG00000226926 |
| MAMDC2     | 3,07  | 0,05  | 2,66E-02 | ENSG00000165072 |
| B3GALT2    | 3,69  | -0,52 | 2,67E-02 | ENSG00000162630 |
| SLC15A2    | 2,71  | 1,08  | 2,67E-02 | ENSG00000163406 |
| EGR3       | 4,46  | 2,73  | 2,71E-02 | ENSG00000179388 |
| CFLAR-AS1  | 3,25  | 0,79  | 2,80E-02 | ENSG00000226312 |
| AL391001.1 | 2,83  | -1,08 | 2,82E-02 | ENSG00000269887 |
| POMC       | 3,49  | -0,82 | 2,85E-02 | ENSG00000115138 |
| RRAD       | 2,83  | -0,63 | 2,91E-02 | ENSG00000166592 |
| KLHL1      | 3,65  | -2,14 | 2,91E-02 | ENSG00000150361 |
| GNG12-AS1  | 2,98  | 0,67  | 2,91E-02 | ENSG00000232284 |
| MGAM       | 2,64  | 1,05  | 2,94E-02 | ENSG00000257335 |
| CALHM5     | 1,88  | 4,84  | 2,96E-02 | ENSG00000178033 |
| DRC1       | 3,30  | -1,94 | 3,02E-02 | ENSG00000157856 |
| AC112503.2 | 3,30  | -1,94 | 3,02E-02 | ENSG00000273454 |
| AC104653.1 | 2,45  | -1,12 | 3,06E-02 | ENSG00000228857 |
| CCL26      | 3,59  | -1,46 | 3,17E-02 | ENSG00000006606 |
| RYR3       | 3,17  | -0,77 | 3,18E-02 | ENSG00000198838 |
| CYP19A1    | 3,00  | -2,10 | 3,19E-02 | ENSG00000137869 |
| KDM3A      | 1,29  | 6,72  | 3,30E-02 | ENSG00000115548 |
| DOK7       | 3,24  | 0,11  | 3,32E-02 | ENSG00000175920 |
| LHFPL1     | 3,24  | -1,92 | 3,36E-02 | ENSG00000182508 |
| SPEF1      | 2,51  | 0,46  | 3,38E-02 | ENSG00000101222 |
| ITGB1BP2   | 2,40  | 0,29  | 3,46E-02 | ENSG00000147166 |
| CHRNA9     | 2,84  | -0,54 | 3,47E-02 | ENSG00000174343 |
| AC092650.1 | 2,81  | -1,88 | 3,83E-02 | ENSG00000230773 |
| PTGES3L    | 2,39  | -0,44 | 3,85E-02 | ENSG00000267060 |
| LRIT3      | -5,46 | -1,46 | 3,92E-02 | ENSG00000183423 |
| C12orf50   | 2,67  | -1,41 | 3,92E-02 | ENSG00000165805 |
| APOC1P1    | 3,40  | -1,56 | 3,94E-02 | ENSG00000214855 |
| ENTPD3     | 2,91  | -1,51 | 3,97E-02 | ENSG00000168032 |
| EXOC5P1    | 2,41  | 0,31  | 3,97E-02 | ENSG00000180673 |
| COL28A1    | 2,89  | -1,52 | 3,98E-02 | ENSG00000215018 |
| GSN-AS1    | 2,74  | -2,17 | 3,98E-02 | ENSG00000235865 |
| KRT18P31   | 2,56  | -1,45 | 4,02E-02 | ENSG00000249850 |
| PRKG1-AS1  | 2,54  | -0,98 | 4,10E-02 | ENSG00000236671 |
| NCKAP1L    | 2,66  | 1,15  | 4,16E-02 | ENSG00000123338 |
| TEK        | 2,82  | 0,90  | 4,17E-02 | ENSG00000120156 |
| PTH        | 3,29  | -1,15 | 4,18E-02 | ENSG00000152266 |
| ANKRD30B   | 2,74  | -1,29 | 4,22E-02 | ENSG00000180777 |
| MYO1A      | 2,70  | -1,54 | 4,30E-02 | ENSG00000166866 |
| PIFO       | 2,98  | 0,19  | 4,33E-02 | ENSG00000173947 |
| PLA1A      | 3,03  | -1,98 | 4,33E-02 | ENSG00000144837 |
| GAPDHP46   | 3,47  | -2,23 | 4,33E-02 | ENSG00000224678 |
| TNC        | 1,44  | 7,06  | 4,36E-02 | ENSG00000041982 |
| SUSD4      | 2,40  | 0,94  | 4,38E-02 | ENSG00000143502 |
| ANGPTL1    | 2,42  | -0,59 | 4,39E-02 | ENSG00000116194 |
| SPAG17     | 3,17  | 0,05  | 4,45E-02 | ENSG00000155761 |
| AKAP6      | 2,28  | 2,36  | 4,47E-02 | ENSG00000151320 |
| HGD        | 2,69  | -1,96 | 4,51E-02 | ENSG00000113924 |
| FRG2B      | 2,76  | -1,62 | 4,53E-02 | ENSG00000225899 |

|            |       |       |          |                 |
|------------|-------|-------|----------|-----------------|
| RGS22      | 2,45  | -1,00 | 4,55E-02 | ENSG00000132554 |
| CHORDC2P   | 2,28  | -1,33 | 4,57E-02 | ENSG00000259050 |
| AP003108.3 | -5,27 | -1,58 | 4,59E-02 | ENSG00000279246 |
| AC004854.2 | 2,33  | 0,58  | 4,60E-02 | ENSG00000272768 |
| LINC00595  | 2,64  | -0,46 | 4,66E-02 | ENSG00000230417 |
| DUOX1      | 2,74  | -1,86 | 4,75E-02 | ENSG00000137857 |
| CPO        | 2,78  | -1,88 | 4,76E-02 | ENSG00000144410 |
| AL831711.1 | 2,47  | -1,43 | 4,76E-02 | ENSG00000283317 |
| ZFHX4-AS1  | 2,47  | 0,05  | 4,87E-02 | ENSG00000253661 |
| LINC02458  | 3,39  | 0,43  | 4,92E-02 | ENSG00000246363 |
| LINC00639  | -6,42 | -0,77 | 4,98E-02 | ENSG00000259070 |
| MX1        | 2,57  | 3,63  | 5,00E-02 | ENSG00000157601 |
| LINGO2     | 2,51  | 2,79  | 5,00E-02 | ENSG00000174482 |
| NUDT17     | 1,95  | 3,70  | 5,01E-02 | ENSG00000186364 |
| CALD1      | 1,34  | 7,90  | 5,04E-02 | ENSG00000122786 |
