# Supplementary material for: SRF Rearrangements in Soft Tissue Tumors with Muscle Differentiation
Source: MDPI journal article supplement (doi:10.3390/biom12111678), 2022-11-12
Supplement: s1 [file s1]

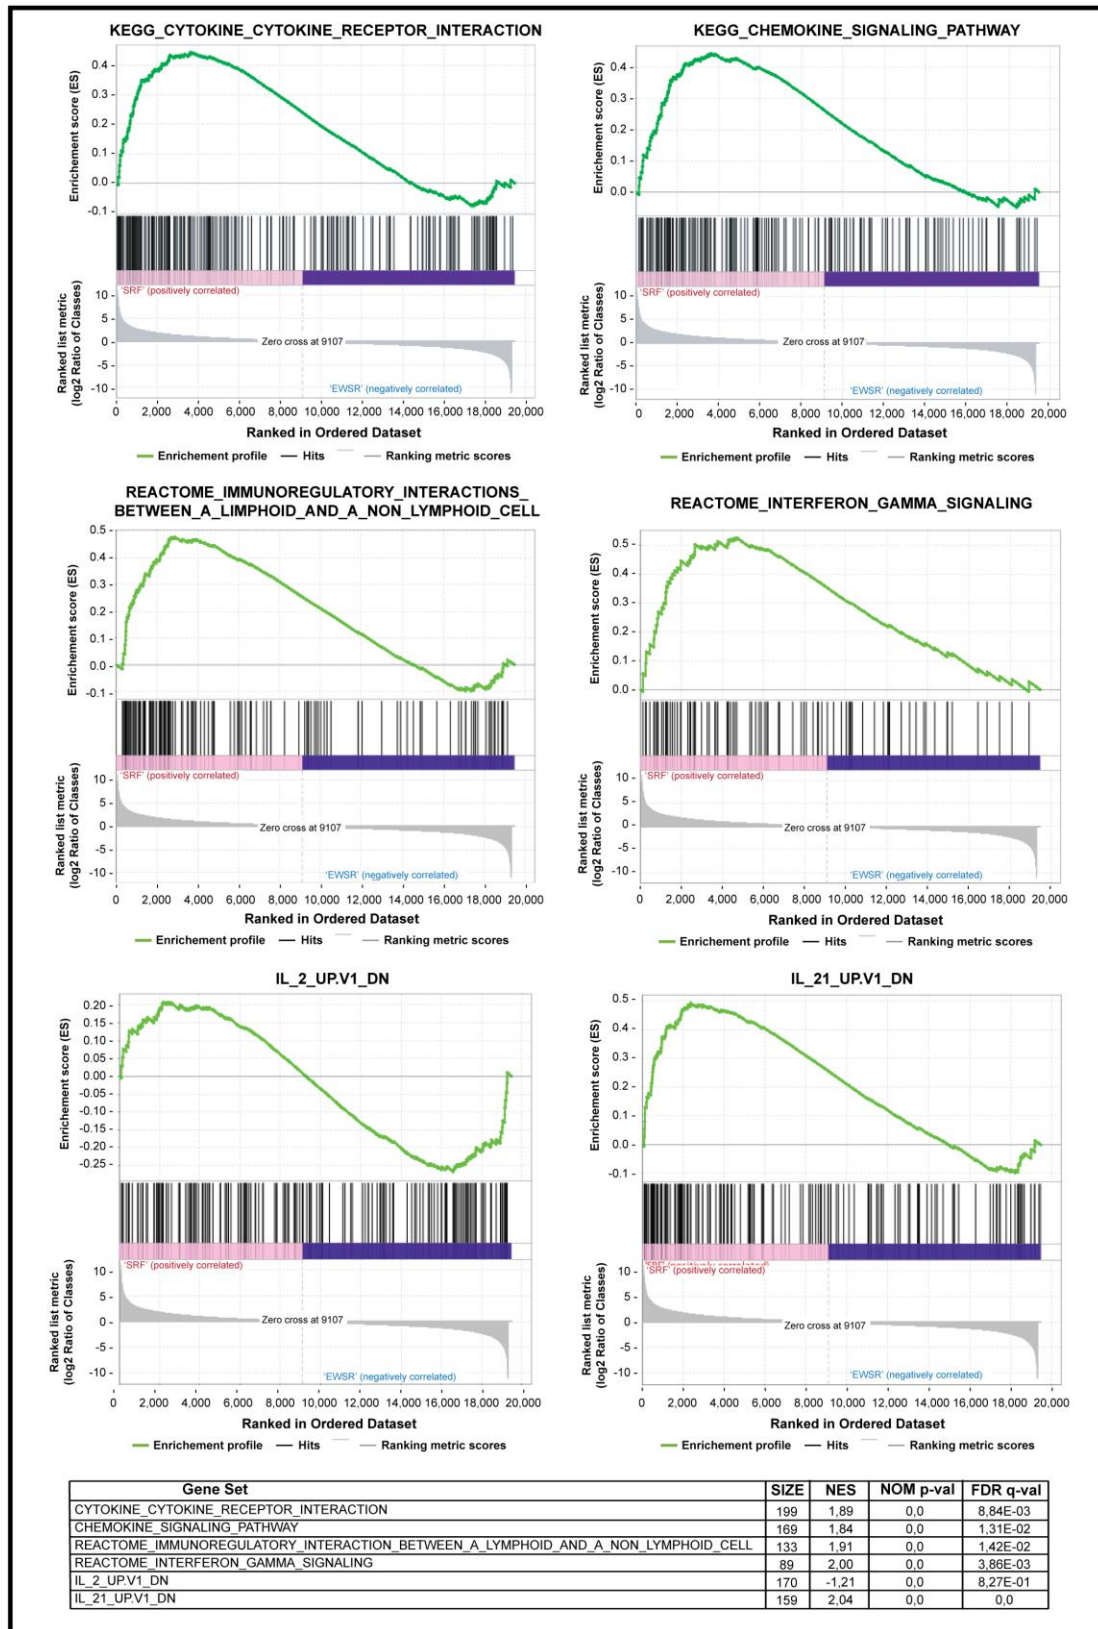

**Supplementary Figure S1. GSEA analyses of *SRF::E2F1* myoepitheliomas versus *EWSR1*-fused positive tumors.** a) Enrichment curves of the significantly enriched gene sets referring to immune activation and inflammation. NES: Normalized Enrichment Scores NOM p-val: Nominal p-value; FDR q-val: False Discovery Rate q-value
