# Supplementary material for: SRF Rearrangements in Soft Tissue Tumors with Muscle Differentiation
Source: MDPI journal article supplement (doi:10.3390/biom12111678), 2022-11-12
Supplement: s1 [file s1]

**Supplementary Table S2. Differentially expressed genes between *SRF-Fused* and *EWSR1-Fused* tumors (logFC=log2 fold change; logCPM=log2 counts/million).**

| GENE SYMBOL | logFC  | logCPM | PValue   | GENE ID         |
|-------------|--------|--------|----------|-----------------|
| KRT12       | 11,06  | 7,94   | 1,12E-11 | ENSG00000187242 |
| MPZ         | 9,24   | 10,36  | 1,36E-11 | ENSG00000158887 |
| KLHDC8A     | 8,79   | 6,38   | 3,40E-11 | ENSG00000162873 |
| STMN2       | 8,07   | 6,89   | 4,87E-11 | ENSG00000104435 |
| NCMAP       | 13,39  | 6,52   | 6,19E-11 | ENSG00000184454 |
| SOX10       | 9,44   | 6,76   | 3,16E-10 | ENSG00000100146 |
| AC004231.3  | 12,77  | 5,91   | 3,17E-10 | ENSG00000265359 |
| DCSTAMP     | 12,55  | 5,68   | 4,13E-10 | ENSG00000164935 |
| PLP1        | 9,23   | 8,57   | 5,03E-10 | ENSG00000123560 |
| TACSTD2     | 8,67   | 9,19   | 6,31E-10 | ENSG00000184292 |
| RPE65       | 12,70  | 5,84   | 1,03E-09 | ENSG00000116745 |
| PRIMA1      | 8,23   | 5,80   | 1,06E-09 | ENSG00000175785 |
| CALY        | 9,81   | 6,69   | 1,17E-09 | ENSG00000130643 |
| ARC         | 7,92   | 6,34   | 1,50E-09 | ENSG00000198576 |
| CLVS2       | -12,10 | 5,24   | 2,00E-09 | ENSG00000146352 |
| NGFR        | 8,23   | 8,30   | 3,60E-09 | ENSG00000064300 |
| ZFP42       | 12,34  | 5,47   | 4,21E-09 | ENSG00000179059 |
| FGFBP2      | 12,08  | 5,22   | 1,23E-08 | ENSG00000137441 |
| SCN2A       | -6,13  | 5,80   | 1,51E-08 | ENSG00000136531 |
| ASPA        | 8,92   | 6,78   | 2,28E-08 | ENSG00000108381 |
| P2RX1       | 6,61   | 6,02   | 2,84E-08 | ENSG00000108405 |
| ILDR2       | 8,13   | 5,31   | 3,07E-08 | ENSG00000143195 |
| EGR4        | 11,59  | 4,73   | 3,52E-08 | ENSG00000135625 |
| ADGRG2      | -10,54 | 8,35   | 3,96E-08 | ENSG00000173698 |
| GJB2        | 7,70   | 5,51   | 4,64E-08 | ENSG00000165474 |
| ERBB3       | 5,76   | 5,79   | 1,20E-07 | ENSG00000065361 |
| UGT8        | 6,93   | 5,20   | 1,25E-07 | ENSG00000174607 |
| ITGA11      | -5,43  | 8,47   | 1,71E-07 | ENSG00000137809 |
| DGAT2L6     | 11,58  | 4,73   | 2,09E-07 | ENSG00000184210 |
| WIPF3       | -6,02  | 5,20   | 2,09E-07 | ENSG00000122574 |
| TRIM54      | 7,48   | 5,26   | 2,36E-07 | ENSG00000138100 |
| KRT17       | 6,65   | 5,29   | 3,59E-07 | ENSG00000128422 |
| GAP43       | 7,43   | 6,79   | 4,16E-07 | ENSG00000172020 |
| LINC01010   | 11,43  | 4,57   | 4,36E-07 | ENSG00000236700 |
| FA2H        | 7,83   | 5,17   | 5,15E-07 | ENSG00000103089 |
| EGR3        | 5,24   | 6,70   | 5,70E-07 | ENSG00000179388 |
| ACTC1       | 6,31   | 7,46   | 6,22E-07 | ENSG00000159251 |
| FOXD3       | 8,73   | 4,25   | 7,43E-07 | ENSG00000187140 |
| AIF1L       | 5,09   | 5,56   | 7,46E-07 | ENSG00000126878 |
| COL9A3      | 5,08   | 6,05   | 9,20E-07 | ENSG00000092758 |
| PCOLCE2     | -5,78  | 5,32   | 1,23E-06 | ENSG00000163710 |
| FAM71F1     | 7,80   | 4,65   | 1,30E-06 | ENSG00000135248 |
| AC006148.1  | -13,78 | 6,91   | 1,55E-06 | ENSG00000242593 |
| AC005906.2  | -7,77  | 5,46   | 1,61E-06 | ENSG00000256654 |
| LPAR3       | -7,64  | 3,86   | 1,64E-06 | ENSG00000171517 |
| FMO2        | 6,22   | 4,40   | 1,69E-06 | ENSG00000094963 |
| MT1H        | 10,70  | 3,86   | 1,73E-06 | ENSG00000205358 |
| RTN2        | 5,98   | 5,50   | 2,00E-06 | ENSG00000125744 |
| GATM        | 6,26   | 7,59   | 2,39E-06 | ENSG00000171766 |
| CLDN1       | 6,03   | 4,79   | 2,61E-06 | ENSG00000163347 |
| FGF1        | 5,26   | 5,45   | 2,62E-06 | ENSG00000113578 |
| MIR4697HG   | 6,03   | 5,78   | 3,72E-06 | ENSG00000280237 |
| CAMK2N1     | 4,60   | 6,69   | 4,53E-06 | ENSG00000162545 |
| NPPC        | -10,36 | 3,53   | 4,53E-06 | ENSG00000163273 |
| SHC4        | 6,20   | 6,02   | 4,75E-06 | ENSG00000185634 |
| SV2B        | 10,42  | 3,59   | 4,99E-06 | ENSG00000185518 |
| KCNA2       | 6,93   | 4,20   | 5,07E-06 | ENSG00000177301 |
| IGFBP1      | 10,52  | 3,68   | 5,17E-06 | ENSG00000146678 |
| CX3CR1      | 6,52   | 4,64   | 5,24E-06 | ENSG00000168329 |
| FSTL5       | 6,72   | 5,30   | 5,25E-06 | ENSG00000168843 |

|            |        |      |          |                 |
|------------|--------|------|----------|-----------------|
| PRSS12     | -7,79  | 5,63 | 5,97E-06 | ENSG00000164099 |
| C4orf19    | -6,41  | 4,07 | 5,99E-06 | ENSG00000154274 |
| FOXD3-AS1  | 8,39   | 3,92 | 6,00E-06 | ENSG00000230798 |
| PRX        | 5,47   | 6,39 | 6,12E-06 | ENSG00000105227 |
| COL19A1    | 7,39   | 4,29 | 6,17E-06 | ENSG00000082293 |
| KCNK12     | 6,97   | 3,83 | 6,45E-06 | ENSG00000184261 |
| AC006487.1 | 10,08  | 3,24 | 6,50E-06 | ENSG00000249906 |
| VSIG1      | -7,26  | 3,92 | 6,62E-06 | ENSG00000101842 |
| CHRNA9     | 10,61  | 3,78 | 6,72E-06 | ENSG00000174343 |
| GALR1      | 7,08   | 4,39 | 7,34E-06 | ENSG00000166573 |
| CLDN19     | 7,78   | 4,13 | 7,36E-06 | ENSG00000164007 |
| NTS        | -11,56 | 4,71 | 7,57E-06 | ENSG00000133636 |
| CLDN11     | 5,23   | 6,49 | 8,09E-06 | ENSG00000013297 |
| AC093330.1 | 5,79   | 5,10 | 8,10E-06 | ENSG00000266844 |
| H19        | 5,46   | 9,21 | 8,16E-06 | ENSG00000130600 |
| L1TD1      | 10,61  | 3,77 | 8,80E-06 | ENSG00000240563 |
| CTXND1     | 6,79   | 4,02 | 9,41E-06 | ENSG00000259417 |
| UCHL1      | -4,40  | 7,65 | 1,09E-05 | ENSG00000154277 |
| AL596330.1 | 7,38   | 3,67 | 1,18E-05 | ENSG00000229400 |
| DHH        | 5,69   | 5,74 | 1,21E-05 | ENSG00000139549 |
| PNMA5      | -10,06 | 6,97 | 1,24E-05 | ENSG00000198883 |
| CD177      | 9,75   | 2,88 | 1,28E-05 | ENSG00000204936 |
| NRXN3      | 5,94   | 3,80 | 1,36E-05 | ENSG00000021645 |
| IGSF9      | -8,23  | 8,12 | 1,40E-05 | ENSG00000085552 |
| CES1       | 5,81   | 5,85 | 1,42E-05 | ENSG00000198848 |
| PMP2       | 7,73   | 3,27 | 1,53E-05 | ENSG00000147588 |
| ARSI       | 6,43   | 5,60 | 1,54E-05 | ENSG00000183876 |
| OPALIN     | 8,00   | 3,55 | 1,55E-05 | ENSG00000197430 |
| RF01973    | 5,16   | 5,53 | 1,56E-05 | ENSG00000274866 |
| AC004637.1 | 8,82   | 4,27 | 1,57E-05 | ENSG00000267304 |
| AC133065.2 | 8,54   | 4,00 | 1,60E-05 | ENSG00000262488 |
| RF01972    | 5,25   | 5,74 | 1,61E-05 | ENSG00000275266 |
| SIM2       | -4,24  | 6,02 | 1,61E-05 | ENSG00000159263 |
| ACPP       | 6,48   | 7,38 | 1,67E-05 | ENSG00000014257 |
| SLC9A2     | -8,59  | 5,74 | 1,73E-05 | ENSG00000115616 |
| PCSK1      | 7,26   | 4,21 | 1,75E-05 | ENSG00000175426 |
| VANGL2     | -4,53  | 5,84 | 1,76E-05 | ENSG00000162738 |
| BCAS1      | 6,88   | 7,27 | 1,81E-05 | ENSG00000064787 |
| NOG        | -9,81  | 3,01 | 1,86E-05 | ENSG00000183691 |
| SDC1       | -5,50  | 8,38 | 2,00E-05 | ENSG00000115884 |
| CNN1       | 4,65   | 7,53 | 2,10E-05 | ENSG00000130176 |
| ADGRB1     | 4,41   | 6,61 | 2,18E-05 | ENSG00000181790 |
| PRND       | 6,42   | 3,30 | 2,18E-05 | ENSG00000171864 |
| IL7R       | 5,83   | 6,45 | 2,26E-05 | ENSG00000168685 |
| GUCY1B2    | -6,87  | 3,11 | 2,47E-05 | ENSG00000123201 |
| FOXQ1      | -7,60  | 3,79 | 2,83E-05 | ENSG00000164379 |
| BIRC7      | 7,50   | 4,30 | 2,86E-05 | ENSG00000101197 |
| ROBO2      | -6,71  | 4,54 | 3,04E-05 | ENSG00000185008 |
| TFAP2A     | 6,02   | 4,62 | 3,07E-05 | ENSG00000137203 |
| LMO3       | -6,57  | 6,19 | 3,22E-05 | ENSG00000048540 |
| PIEZO2     | -4,03  | 7,08 | 3,48E-05 | ENSG00000154864 |
| TMEM132C   | -8,83  | 5,61 | 3,50E-05 | ENSG00000181234 |
| EXTL1      | 4,95   | 4,31 | 3,60E-05 | ENSG00000158008 |
| AC021683.2 | -4,93  | 4,35 | 3,73E-05 | ENSG00000267506 |
| ID4        | 3,90   | 5,58 | 3,81E-05 | ENSG00000172201 |
| MFAP5      | 4,76   | 5,25 | 3,91E-05 | ENSG00000197614 |
| SIM1       | -11,05 | 4,21 | 3,99E-05 | ENSG00000112246 |
| VAT1L      | 6,72   | 3,04 | 4,06E-05 | ENSG00000171724 |
| KCNF1      | 6,07   | 4,90 | 4,29E-05 | ENSG00000162975 |
| COL22A1    | 5,96   | 7,00 | 4,39E-05 | ENSG00000169436 |
| CYP2E1     | -4,98  | 6,35 | 4,47E-05 | ENSG00000130649 |
| SLC6A10P   | -11,67 | 8,05 | 4,51E-05 | ENSG00000214617 |
| NRG1       | -4,63  | 5,63 | 4,61E-05 | ENSG00000157168 |
| MBP        | 4,14   | 6,63 | 4,66E-05 | ENSG00000197971 |

|            |        |      |          |                 |
|------------|--------|------|----------|-----------------|
| LINC01819  | 7,36   | 4,32 | 4,70E-05 | ENSG00000231826 |
| KCNA1      | -5,62  | 3,96 | 4,94E-05 | ENSG00000111262 |
| PITX2      | -6,43  | 4,66 | 5,43E-05 | ENSG00000164093 |
| HCN1       | -7,03  | 4,03 | 5,47E-05 | ENSG00000164588 |
| S100A16    | 4,52   | 7,44 | 5,59E-05 | ENSG00000188643 |
| CHL1       | 5,12   | 5,38 | 5,95E-05 | ENSG00000134121 |
| KISS1      | -10,21 | 6,50 | 5,95E-05 | ENSG00000170498 |
| SLC44A5    | -9,66  | 5,91 | 6,01E-05 | ENSG00000137968 |
| FAM171B    | -3,90  | 6,67 | 6,46E-05 | ENSG00000144369 |
| AC091152.4 | 9,12   | 2,32 | 6,59E-05 | ENSG00000279879 |
| PCP4L1     | 6,71   | 3,08 | 6,61E-05 | ENSG00000248485 |
| BMP8B      | 4,67   | 6,51 | 7,08E-05 | ENSG00000116985 |
| ENTHD1     | 7,07   | 3,50 | 7,08E-05 | ENSG00000176177 |
| LINC00707  | 6,61   | 2,93 | 7,09E-05 | ENSG00000238266 |
| OLR1       | 6,12   | 4,03 | 7,16E-05 | ENSG00000173391 |
| RTN1       | -4,06  | 5,56 | 7,33E-05 | ENSG00000139970 |
| GRAMD1B    | 4,48   | 5,78 | 7,42E-05 | ENSG00000023171 |
| ARNTL2     | 4,79   | 4,78 | 7,78E-05 | ENSG00000029153 |
| PTPRD      | -4,15  | 6,02 | 7,81E-05 | ENSG00000153707 |
| AFAP1-AS1  | -6,23  | 6,95 | 7,83E-05 | ENSG00000272620 |
| SEMA3B     | 4,19   | 7,56 | 7,95E-05 | ENSG00000012171 |
| ITIH3      | 4,56   | 5,97 | 8,03E-05 | ENSG00000162267 |
| KRT23      | 10,54  | 3,65 | 8,38E-05 | ENSG00000108244 |
| AC133561.1 | -10,24 | 6,56 | 8,57E-05 | ENSG00000198555 |
| ADAMTS15   | 4,42   | 5,52 | 8,69E-05 | ENSG00000166106 |
| FLRT3      | 6,24   | 3,53 | 8,73E-05 | ENSG00000125848 |
| FOLH1      | -6,42  | 6,72 | 9,15E-05 | ENSG00000086205 |
| AC004656.1 | -3,87  | 7,19 | 9,18E-05 | ENSG00000260822 |
| CYB5R2     | 4,34   | 5,08 | 9,66E-05 | ENSG00000166394 |
| DNAJB5     | 4,16   | 5,26 | 9,66E-05 | ENSG00000137094 |
| ALPK3      | 4,31   | 5,62 | 9,70E-05 | ENSG00000136383 |
| LINC00482  | -7,95  | 3,36 | 9,79E-05 | ENSG00000185168 |
| CXCL10     | 4,46   | 4,34 | 9,83E-05 | ENSG00000169245 |
| ASB2       | 5,58   | 3,23 | 9,84E-05 | ENSG00000100628 |
| STK32B     | 4,71   | 5,21 | 9,96E-05 | ENSG00000152953 |
| PAPPA2     | -9,08  | 7,61 | 1,02E-04 | ENSG00000116183 |
| STEAP1B    | 6,08   | 2,98 | 1,08E-04 | ENSG00000105889 |
| CALHM5     | 4,34   | 4,80 | 1,08E-04 | ENSG00000178033 |
| FEZF1-AS1  | -10,23 | 3,41 | 1,09E-04 | ENSG00000230316 |
| NFIA-AS2   | 5,50   | 4,31 | 1,09E-04 | ENSG00000237928 |
| OPCML      | 7,41   | 2,97 | 1,09E-04 | ENSG00000183715 |
| GRID2      | -10,53 | 3,71 | 1,12E-04 | ENSG00000152208 |
| PLEKHA4    | 3,64   | 7,63 | 1,15E-04 | ENSG00000105559 |
| EGFL6      | -5,20  | 6,80 | 1,19E-04 | ENSG00000198759 |
| CCL2       | 3,58   | 5,65 | 1,23E-04 | ENSG00000108691 |
| KREMEN2    | 6,19   | 3,03 | 1,23E-04 | ENSG00000131650 |
| AC234582.1 | -3,64  | 6,88 | 1,25E-04 | ENSG00000231064 |
| PLEKHB1    | 4,10   | 6,70 | 1,25E-04 | ENSG00000021300 |
| GLDC       | 5,56   | 3,89 | 1,28E-04 | ENSG00000178445 |
| KIF19      | 5,73   | 2,62 | 1,29E-04 | ENSG00000196169 |
| IL1B       | 9,28   | 2,49 | 1,29E-04 | ENSG00000125538 |
| FAM83F     | 6,74   | 3,18 | 1,30E-04 | ENSG00000133477 |
| LINC00702  | 4,85   | 3,94 | 1,33E-04 | ENSG00000233117 |
| CMTM5      | 4,90   | 4,63 | 1,36E-04 | ENSG00000166091 |
| CAMK2B     | 4,95   | 4,74 | 1,37E-04 | ENSG00000058404 |
| AC008708.2 | 9,25   | 2,46 | 1,39E-04 | ENSG00000254187 |
| VWC2       | -9,92  | 3,11 | 1,39E-04 | ENSG00000188730 |
| ADH1C      | 6,95   | 2,52 | 1,41E-04 | ENSG00000248144 |
| CNTF       | 6,38   | 2,71 | 1,46E-04 | ENSG00000242689 |
| LINC01426  | 5,42   | 3,60 | 1,47E-04 | ENSG00000234380 |
| KLHL4      | 5,61   | 2,96 | 1,49E-04 | ENSG00000102271 |
| PKIA       | 5,31   | 3,77 | 1,50E-04 | ENSG00000171033 |
| FRG1GP     | -8,81  | 5,01 | 1,54E-04 | ENSG00000283023 |
| SV2A       | -3,88  | 5,99 | 1,55E-04 | ENSG00000159164 |

|            |       |       |          |                 |
|------------|-------|-------|----------|-----------------|
| MYLK       | 4,00  | 8,28  | 1,56E-04 | ENSG00000065534 |
| BARX1      | -6,46 | 5,14  | 1,60E-04 | ENSG00000131668 |
| CLCF1      | 4,49  | 6,19  | 1,68E-04 | ENSG00000175505 |
| NFASC      | 4,43  | 6,27  | 1,71E-04 | ENSG00000163531 |
| MGAT3      | 4,06  | 4,69  | 1,73E-04 | ENSG00000128268 |
| LINC00511  | 4,67  | 4,64  | 1,77E-04 | ENSG00000227036 |
| MINAR1     | -4,08 | 4,53  | 1,79E-04 | ENSG00000169330 |
| KIAA0319   | -7,74 | 3,89  | 1,81E-04 | ENSG00000137261 |
| SEMA3D     | -9,83 | 6,17  | 1,82E-04 | ENSG00000153993 |
| APOD       | 4,04  | 10,29 | 1,85E-04 | ENSG00000189058 |
| AQP4       | -9,79 | 6,67  | 1,91E-04 | ENSG00000171885 |
| EPHA7      | -7,04 | 6,10  | 1,92E-04 | ENSG00000135333 |
| FMO1       | 4,99  | 3,71  | 1,94E-04 | ENSG00000010932 |
| PADI2      | 4,67  | 4,16  | 1,95E-04 | ENSG00000117115 |
| TSPAN15    | 4,32  | 6,54  | 1,96E-04 | ENSG00000099282 |
| KCNMB1     | 4,25  | 5,08  | 1,96E-04 | ENSG00000145936 |
| P2RY14     | 5,29  | 3,12  | 1,97E-04 | ENSG00000174944 |
| NDNF       | -6,40 | 4,90  | 1,98E-04 | ENSG00000173376 |
| ALDH1A3    | 4,40  | 6,85  | 2,01E-04 | ENSG00000184254 |
| FRMPD3     | -7,29 | 3,47  | 2,03E-04 | ENSG00000147234 |
| OASL       | 4,69  | 4,27  | 2,07E-04 | ENSG00000135114 |
| RDH5       | 6,80  | 2,30  | 2,07E-04 | ENSG00000135437 |
| AC015712.2 | 4,45  | 6,13  | 2,15E-04 | ENSG00000259583 |
| CORIN      | -4,04 | 4,52  | 2,16E-04 | ENSG00000145244 |
| AC110772.1 | -8,79 | 4,16  | 2,21E-04 | ENSG00000249742 |
| Z84468.1   | -9,18 | 2,42  | 2,22E-04 | ENSG00000281732 |
| AL355974.2 | 9,11  | 2,34  | 2,27E-04 | ENSG00000275830 |
| ATCAY      | 6,24  | 3,23  | 2,29E-04 | ENSG00000167654 |
| GALNT5     | -5,08 | 6,33  | 2,37E-04 | ENSG00000136542 |
| HEPH       | 4,08  | 5,85  | 2,45E-04 | ENSG00000089472 |
| RPS6KA1    | 4,28  | 7,78  | 2,46E-04 | ENSG00000117676 |
| IL17B      | 5,73  | 3,52  | 2,47E-04 | ENSG00000127743 |
| UROC1      | -7,39 | 3,48  | 2,47E-04 | ENSG00000159650 |
| SGCA       | 4,57  | 3,50  | 2,51E-04 | ENSG00000108823 |
| AC015656.1 | 8,67  | 1,91  | 2,53E-04 | ENSG00000279036 |
| CLEC9A     | 6,13  | 2,52  | 2,54E-04 | ENSG00000197992 |
| LHPP       | 3,66  | 5,86  | 2,64E-04 | ENSG00000107902 |
| PICSA      | 8,52  | 1,75  | 2,65E-04 | ENSG00000275874 |
| LINC01451  | 7,71  | 3,21  | 2,66E-04 | ENSG00000279141 |
| HERC2P4    | -6,78 | 5,18  | 2,75E-04 | ENSG00000230267 |
| OPRD1      | 5,28  | 4,40  | 2,75E-04 | ENSG00000116329 |
| IRF6       | 6,68  | 2,19  | 2,80E-04 | ENSG00000117595 |
| KRT14      | 5,42  | 2,38  | 2,85E-04 | ENSG00000186847 |
| SYCE1      | -6,56 | 6,17  | 2,89E-04 | ENSG00000171772 |
| GRIP1      | -4,73 | 4,87  | 2,91E-04 | ENSG00000155974 |
| F5         | -7,08 | 2,53  | 2,96E-04 | ENSG00000198734 |
| S100B      | 4,78  | 7,40  | 2,97E-04 | ENSG00000160307 |
| AP001350.2 | 6,37  | 2,82  | 2,99E-04 | ENSG00000280010 |
| PAX7       | -9,27 | 5,61  | 3,03E-04 | ENSG00000009709 |
| COLCA2     | -4,92 | 5,16  | 3,04E-04 | ENSG00000214290 |
| OLFM1      | -5,50 | 9,39  | 3,09E-04 | ENSG00000130558 |
| HKDC1      | 5,86  | 3,53  | 3,10E-04 | ENSG00000156510 |
| MUC5B      | 4,85  | 4,08  | 3,22E-04 | ENSG00000117983 |
| SEZ6L2     | 4,37  | 4,29  | 3,26E-04 | ENSG00000174938 |
| CEACAM21   | 5,47  | 3,84  | 3,29E-04 | ENSG00000007129 |
| AC104793.1 | 6,99  | 2,58  | 3,33E-04 | ENSG00000249568 |
| CHD5       | -6,86 | 6,73  | 3,35E-04 | ENSG00000116254 |
| SMPDL3B    | -5,21 | 3,52  | 3,37E-04 | ENSG00000130768 |
| TAGLN      | 3,54  | 9,73  | 3,39E-04 | ENSG00000149591 |
| INMT       | 3,61  | 4,86  | 3,40E-04 | ENSG00000241644 |
| NELL2      | -6,63 | 7,07  | 3,42E-04 | ENSG00000184613 |
| MTCL1      | -3,46 | 6,89  | 3,48E-04 | ENSG00000168502 |
| GRIN2A     | 5,50  | 3,14  | 3,50E-04 | ENSG00000183454 |
| LINC01141  | 6,11  | 2,51  | 3,50E-04 | ENSG00000236963 |

|              |       |      |          |                 |
|--------------|-------|------|----------|-----------------|
| CSPG4        | 3,76  | 8,18 | 3,52E-04 | ENSG00000173546 |
| CXCL11       | 5,01  | 3,01 | 3,54E-04 | ENSG00000169248 |
| AC011603.1   | 6,50  | 2,89 | 3,54E-04 | ENSG00000257346 |
| FABP5        | 3,76  | 4,56 | 3,57E-04 | ENSG00000164687 |
| SPOCD1       | 4,50  | 5,76 | 3,61E-04 | ENSG00000134668 |
| NTRK3        | 4,50  | 6,32 | 3,64E-04 | ENSG00000140538 |
| BVES         | 4,60  | 6,03 | 3,68E-04 | ENSG00000112276 |
| ST6GALNAC2   | 6,59  | 2,10 | 3,68E-04 | ENSG00000070731 |
| DIRAS2       | 5,43  | 3,64 | 3,73E-04 | ENSG00000165023 |
| TNN          | -8,10 | 7,95 | 3,77E-04 | ENSG00000120332 |
| MAP1B        | 3,87  | 7,81 | 3,80E-04 | ENSG00000131711 |
| AC010980.2   | -8,13 | 1,46 | 3,82E-04 | ENSG00000267034 |
| PRDM6        | -3,92 | 4,57 | 3,84E-04 | ENSG00000061455 |
| CALN1        | -7,09 | 5,48 | 3,84E-04 | ENSG00000183166 |
| CELSR2       | 3,85  | 5,21 | 3,87E-04 | ENSG00000143126 |
| PLXNC1       | -3,32 | 6,69 | 3,99E-04 | ENSG00000136040 |
| NSG2         | -6,95 | 5,07 | 4,03E-04 | ENSG00000170091 |
| TENM2        | 4,10  | 5,52 | 4,05E-04 | ENSG00000145934 |
| MTMR11       | -3,38 | 7,34 | 4,06E-04 | ENSG00000014914 |
| THBS3        | -3,35 | 8,58 | 4,09E-04 | ENSG00000169231 |
| SLC5A12      | -7,07 | 4,04 | 4,10E-04 | ENSG00000148942 |
| APLP1        | 4,55  | 4,62 | 4,11E-04 | ENSG00000105290 |
| MOXD1        | -5,22 | 8,12 | 4,13E-04 | ENSG00000079931 |
| SHH          | 5,69  | 3,48 | 4,20E-04 | ENSG00000164690 |
| LINC01667    | -8,22 | 4,49 | 4,28E-04 | ENSG00000280081 |
| LY6G6C       | -7,33 | 3,95 | 4,30E-04 | ENSG00000204421 |
| GALNT13      | -7,10 | 6,10 | 4,31E-04 | ENSG00000144278 |
| AC105020.4   | 4,27  | 4,70 | 4,36E-04 | ENSG00000260892 |
| C9orf129     | -5,69 | 2,00 | 4,37E-04 | ENSG00000204352 |
| FZD10        | -4,80 | 3,99 | 4,38E-04 | ENSG00000111432 |
| CXCL13       | -7,73 | 8,02 | 4,38E-04 | ENSG00000156234 |
| HS3ST4       | 6,99  | 3,74 | 4,40E-04 | ENSG00000182601 |
| LARGE2       | -6,85 | 2,33 | 4,45E-04 | ENSG00000165905 |
| GIPC3        | 4,01  | 4,43 | 4,50E-04 | ENSG00000179855 |
| COLCA1       | -4,14 | 4,90 | 4,50E-04 | ENSG00000196167 |
| POU2AF1      | -5,39 | 3,73 | 4,53E-04 | ENSG00000110777 |
| PHF2P2       | -9,05 | 2,30 | 4,54E-04 | ENSG00000226057 |
| NES          | 4,12  | 8,13 | 4,57E-04 | ENSG00000132688 |
| GJB1         | 8,60  | 1,85 | 4,58E-04 | ENSG00000169562 |
| ANO1-AS1     | -4,40 | 6,81 | 4,61E-04 | ENSG00000254902 |
| GALNT3       | -3,86 | 5,15 | 4,62E-04 | ENSG00000115339 |
| DRAXIN       | 5,04  | 4,04 | 4,62E-04 | ENSG00000162490 |
| LGI1         | 8,11  | 1,35 | 4,63E-04 | ENSG00000108231 |
| LVRN         | -8,80 | 7,98 | 4,67E-04 | ENSG00000172901 |
| SLC30A8      | -8,24 | 3,62 | 4,70E-04 | ENSG00000164756 |
| CXCL12       | 3,27  | 7,26 | 4,81E-04 | ENSG00000107562 |
| NKAIN4       | 6,14  | 3,54 | 4,84E-04 | ENSG00000101198 |
| LINC01629    | 6,29  | 3,29 | 4,91E-04 | ENSG00000258602 |
| GATA6        | -3,56 | 5,62 | 4,91E-04 | ENSG00000141448 |
| NIM1K        | 5,38  | 3,56 | 4,91E-04 | ENSG00000177453 |
| MIR1-1HG-AS1 | 5,29  | 2,18 | 4,99E-04 | ENSG00000174403 |
| AC008522.1   | 3,72  | 5,13 | 5,14E-04 | ENSG00000279232 |
| IL17RE       | 4,29  | 4,64 | 5,17E-04 | ENSG00000163701 |
| BOK          | 3,47  | 5,50 | 5,20E-04 | ENSG00000176720 |
| CACNA1G      | -4,17 | 4,08 | 5,23E-04 | ENSG00000006283 |
| EMID1        | -3,94 | 4,87 | 5,26E-04 | ENSG00000186998 |
| GPR22        | -9,40 | 2,62 | 5,33E-04 | ENSG00000172209 |
| KREMEN1      | -3,42 | 7,00 | 5,42E-04 | ENSG00000183762 |
| APOL4        | 4,20  | 3,98 | 5,45E-04 | ENSG00000100336 |
| CELF2        | 3,41  | 6,65 | 5,46E-04 | ENSG00000048740 |
| KANK4        | 5,30  | 3,46 | 5,47E-04 | ENSG00000132854 |
| AL354861.3   | 5,33  | 2,90 | 5,57E-04 | ENSG00000268926 |
| GGT4P        | -9,14 | 2,38 | 5,68E-04 | ENSG00000280208 |
| SOX2-OT      | 4,67  | 3,82 | 5,75E-04 | ENSG00000242808 |

|            |       |       |          |                 |
|------------|-------|-------|----------|-----------------|
| UMODL1     | -4,86 | 2,97  | 5,82E-04 | ENSG00000177398 |
| IL31RA     | 5,07  | 2,95  | 5,84E-04 | ENSG00000164509 |
| AC125611.4 | -6,17 | 5,97  | 5,98E-04 | ENSG00000258334 |
| CHI3L1     | 3,83  | 5,42  | 6,04E-04 | ENSG00000133048 |
| PRH2       | 7,82  | 5,54  | 6,05E-04 | ENSG00000134551 |
| C3         | 3,44  | 7,76  | 6,05E-04 | ENSG00000125730 |
| SCN5A      | -6,25 | 3,44  | 6,09E-04 | ENSG00000183873 |
| AZGP1      | 5,12  | 2,46  | 6,09E-04 | ENSG00000160862 |
| HOTTIP     | -9,51 | 2,73  | 6,13E-04 | ENSG00000243766 |
| FADS3      | 3,48  | 7,89  | 6,16E-04 | ENSG00000221968 |
| ADGRA1     | 7,40  | 3,71  | 6,16E-04 | ENSG00000197177 |
| SEMA3G     | 3,34  | 5,02  | 6,18E-04 | ENSG00000010319 |
| BAALC      | 5,38  | 3,07  | 6,21E-04 | ENSG00000164929 |
| GAS7       | 3,55  | 7,70  | 6,23E-04 | ENSG00000007237 |
| ADAMTS17   | -3,81 | 5,12  | 6,41E-04 | ENSG00000140470 |
| ADAMTS3    | -3,85 | 4,30  | 6,44E-04 | ENSG00000156140 |
| AC092834.1 | -8,49 | 1,77  | 6,46E-04 | ENSG00000249453 |
| IFI27      | 3,24  | 6,93  | 6,54E-04 | ENSG00000165949 |
| MAGEA12    | -9,46 | 2,68  | 6,60E-04 | ENSG00000213401 |
| OXTR       | 4,20  | 5,12  | 6,60E-04 | ENSG00000180914 |
| CYP3A5     | -6,08 | 5,48  | 6,61E-04 | ENSG00000106258 |
| APOBEC3C   | 3,39  | 4,98  | 6,62E-04 | ENSG00000244509 |
| HORMAD1    | -8,00 | 3,39  | 6,73E-04 | ENSG00000143452 |
| RNF212     | -4,43 | 5,08  | 6,84E-04 | ENSG00000178222 |
| AC246817.2 | -8,61 | 1,89  | 6,93E-04 | ENSG00000254319 |
| GNG11      | 3,23  | 6,20  | 7,03E-04 | ENSG00000127920 |
| STUM       | 4,20  | 3,59  | 7,10E-04 | ENSG00000203685 |
| AKAP5      | 5,00  | 4,04  | 7,11E-04 | ENSG00000179841 |
| USH1C      | -7,69 | 5,25  | 7,15E-04 | ENSG00000006611 |
| CSMD1      | -5,38 | 3,60  | 7,16E-04 | ENSG00000183117 |
| GABRD      | 5,83  | 7,18  | 7,18E-04 | ENSG00000187730 |
| AC092958.1 | 6,64  | 2,17  | 7,35E-04 | ENSG00000239922 |
| CNIH3      | 3,96  | 5,83  | 7,39E-04 | ENSG00000143786 |
| CACNA1E    | -6,70 | 7,04  | 7,46E-04 | ENSG00000198216 |
| HS6ST2     | -5,42 | 4,15  | 7,51E-04 | ENSG00000171004 |
| HTN1       | 7,72  | 4,91  | 7,53E-04 | ENSG00000126550 |
| ANO1       | -3,97 | 8,67  | 7,55E-04 | ENSG00000131620 |
| TFAP2A-AS1 | 8,45  | 1,72  | 7,64E-04 | ENSG00000229950 |
| TTN        | -3,79 | 8,04  | 7,68E-04 | ENSG00000155657 |
| AGTR1      | -5,28 | 4,50  | 7,74E-04 | ENSG00000144891 |
| PPM1N      | 4,46  | 3,94  | 7,78E-04 | ENSG00000213889 |
| HMCN1      | -3,65 | 6,73  | 7,85E-04 | ENSG00000143341 |
| EBF2       | 3,52  | 4,57  | 7,99E-04 | ENSG00000221818 |
| CXCL9      | 4,35  | 4,80  | 8,09E-04 | ENSG00000138755 |
| HLA-DRA    | 3,20  | 8,64  | 8,38E-04 | ENSG00000204287 |
| OTX1       | -7,20 | 4,04  | 8,39E-04 | ENSG00000115507 |
| MAGEC2     | -9,22 | 2,46  | 8,58E-04 | ENSG00000046774 |
| FER1L4     | -3,21 | 5,71  | 8,60E-04 | ENSG00000088340 |
| AC007686.4 | 5,93  | 2,36  | 8,64E-04 | ENSG00000285966 |
| ITGA7      | 3,06  | 7,49  | 8,75E-04 | ENSG00000135424 |
| GREM2      | -6,59 | 5,49  | 8,79E-04 | ENSG00000180875 |
| KRT15      | 7,78  | 5,66  | 8,86E-04 | ENSG00000171346 |
| RELN       | 5,11  | 2,11  | 8,86E-04 | ENSG00000189056 |
| GFOD1      | 3,12  | 5,75  | 8,99E-04 | ENSG00000145990 |
| MEDAG      | 3,33  | 4,90  | 9,03E-04 | ENSG00000102802 |
| MAG        | 5,80  | 2,22  | 9,23E-04 | ENSG00000105695 |
| WDR72      | 6,02  | 2,44  | 9,25E-04 | ENSG00000166415 |
| NRK        | -3,93 | 5,21  | 9,26E-04 | ENSG00000123572 |
| LGALS3BP   | 3,21  | 7,99  | 9,27E-04 | ENSG00000108679 |
| ANKRD13B   | -3,88 | 7,54  | 9,30E-04 | ENSG00000198720 |
| AL354919.2 | 5,65  | 3,45  | 9,31E-04 | ENSG00000254545 |
| GOLGA8B    | -4,31 | 10,17 | 9,32E-04 | ENSG00000215252 |
| RAMP1      | 4,69  | 4,10  | 9,36E-04 | ENSG00000132329 |
| AREG       | 4,79  | 3,37  | 9,49E-04 | ENSG00000109321 |

|            |       |      |          |                 |
|------------|-------|------|----------|-----------------|
| AL512288.1 | -4,96 | 3,03 | 9,53E-04 | ENSG00000227050 |
| COL25A1    | -5,69 | 5,68 | 9,54E-04 | ENSG00000188517 |
| EEF1A2     | 4,65  | 4,46 | 9,56E-04 | ENSG00000101210 |
| GDF6       | -6,28 | 5,19 | 9,63E-04 | ENSG00000156466 |
| LAMC2      | -6,34 | 4,38 | 9,67E-04 | ENSG00000058085 |
| PNMA3      | -5,33 | 4,50 | 9,69E-04 | ENSG00000183837 |
| KCNH5      | -8,88 | 2,14 | 9,71E-04 | ENSG00000140015 |
| DYNC111    | -3,29 | 5,08 | 9,77E-04 | ENSG00000158560 |
| HACD1      | 5,29  | 4,12 | 1,02E-03 | ENSG00000165996 |
| NPTXR      | 4,04  | 5,87 | 1,02E-03 | ENSG00000221890 |
| ACKR2      | -6,12 | 4,81 | 1,02E-03 | ENSG00000144648 |
| EFCAB1     | -5,98 | 2,24 | 1,03E-03 | ENSG00000034239 |
| E2F1       | 4,25  | 6,66 | 1,04E-03 | ENSG00000101412 |
| CILP2      | -5,05 | 7,35 | 1,05E-03 | ENSG00000160161 |
| BACH2      | -3,51 | 4,38 | 1,05E-03 | ENSG00000112182 |
| SERPINI1   | -4,82 | 6,21 | 1,05E-03 | ENSG00000163536 |
| LONRF2     | 4,50  | 3,93 | 1,06E-03 | ENSG00000170500 |
| LINC00518  | 6,33  | 1,96 | 1,06E-03 | ENSG00000183674 |
| TSPAN10    | 4,49  | 4,14 | 1,06E-03 | ENSG00000182612 |
| AP000924.1 | 8,59  | 1,86 | 1,07E-03 | ENSG00000254416 |
| LMOD1      | 3,18  | 6,53 | 1,07E-03 | ENSG00000163431 |
| MYH11      | 3,06  | 8,62 | 1,07E-03 | ENSG00000133392 |
| AC020656.1 | 3,37  | 4,58 | 1,07E-03 | ENSG00000257764 |
| CLCN4      | -3,87 | 4,87 | 1,09E-03 | ENSG00000073464 |
| OGN        | 3,20  | 5,24 | 1,10E-03 | ENSG00000106809 |
| AC025370.1 | 6,19  | 1,66 | 1,11E-03 | ENSG00000253851 |
| UNCX       | -8,63 | 5,03 | 1,12E-03 | ENSG00000164853 |
| AC003035.2 | 6,44  | 2,07 | 1,14E-03 | ENSG00000233535 |
| BMP3       | -6,62 | 3,85 | 1,15E-03 | ENSG00000152785 |
| AVPR1A     | -3,87 | 5,94 | 1,16E-03 | ENSG00000166148 |
| TH         | 6,03  | 2,52 | 1,16E-03 | ENSG00000180176 |
| CACNA2D1   | 3,92  | 5,42 | 1,17E-03 | ENSG00000153956 |
| KCNN4      | 4,02  | 5,30 | 1,17E-03 | ENSG00000104783 |
| ADAMTS4    | 3,30  | 6,92 | 1,18E-03 | ENSG00000158859 |
| EYA4       | -5,62 | 5,64 | 1,18E-03 | ENSG00000112319 |
| GABRA2     | -5,59 | 6,13 | 1,19E-03 | ENSG00000151834 |
| XRCC4      | 3,76  | 4,92 | 1,22E-03 | ENSG00000152422 |
| FAM180A    | -5,17 | 5,67 | 1,22E-03 | ENSG00000189320 |
| DIRAS3     | 4,07  | 4,97 | 1,22E-03 | ENSG00000162595 |
| DTNA       | 4,00  | 3,72 | 1,25E-03 | ENSG00000134769 |
| CLEC18C    | 5,98  | 2,47 | 1,25E-03 | ENSG00000157335 |
| KRT8P23    | -9,05 | 2,29 | 1,27E-03 | ENSG00000259565 |
| GPR63      | -4,17 | 4,35 | 1,28E-03 | ENSG00000112218 |
| BHLHE41    | 3,75  | 6,02 | 1,28E-03 | ENSG00000123095 |
| AC083841.1 | 7,83  | 1,14 | 1,29E-03 | ENSG00000253196 |
| HMCN2      | -4,92 | 6,83 | 1,29E-03 | ENSG00000148357 |
| LMNTD1     | 8,42  | 1,71 | 1,30E-03 | ENSG00000152936 |
| SOX2       | 4,35  | 5,02 | 1,31E-03 | ENSG00000181449 |
| ADGRG5     | 5,29  | 4,00 | 1,31E-03 | ENSG00000159618 |
| SLC47A1    | -6,25 | 5,39 | 1,31E-03 | ENSG00000142494 |
| VEPH1      | -4,88 | 4,69 | 1,32E-03 | ENSG00000197415 |
| CYGB       | 3,13  | 5,52 | 1,32E-03 | ENSG00000161544 |
| BFSP1      | -4,30 | 5,01 | 1,33E-03 | ENSG00000125864 |
| ETHE1      | 3,34  | 5,07 | 1,33E-03 | ENSG00000105755 |
| SH2D4A     | -3,70 | 4,27 | 1,33E-03 | ENSG00000104611 |
| GSTM1      | 6,05  | 3,07 | 1,33E-03 | ENSG00000134184 |
| AC079801.1 | -8,84 | 2,10 | 1,35E-03 | ENSG00000279669 |
| PCDH8      | 5,36  | 2,24 | 1,35E-03 | ENSG00000136099 |
| C2CD4C     | -5,79 | 7,52 | 1,37E-03 | ENSG00000183186 |
| IGLV1-51   | -4,56 | 2,53 | 1,38E-03 | ENSG00000211644 |
| VEGFA      | -2,97 | 8,15 | 1,39E-03 | ENSG00000112715 |
| HOXC12     | -5,61 | 2,67 | 1,41E-03 | ENSG00000123407 |
| AL009181.1 | 5,37  | 3,22 | 1,42E-03 | ENSG00000233427 |
| KRT7       | 7,10  | 2,59 | 1,42E-03 | ENSG00000135480 |

|            |       |      |          |                 |
|------------|-------|------|----------|-----------------|
| FRG1FP     | -7,60 | 5,63 | 1,42E-03 | ENSG00000283047 |
| PLXNB3     | 3,65  | 4,24 | 1,43E-03 | ENSG00000198753 |
| AC068594.1 | 4,96  | 2,28 | 1,44E-03 | ENSG00000263718 |
| AL136131.3 | -4,10 | 3,62 | 1,44E-03 | ENSG00000272114 |
| IDH2       | 3,15  | 5,93 | 1,44E-03 | ENSG00000182054 |
| FGFR3      | 5,22  | 7,21 | 1,45E-03 | ENSG00000068078 |
| AC022075.1 | 5,04  | 2,06 | 1,48E-03 | ENSG00000245648 |
| UST        | -4,36 | 5,70 | 1,48E-03 | ENSG00000111962 |
| PTPRU      | -3,54 | 6,98 | 1,52E-03 | ENSG00000060656 |
| HLA-DPA1   | 3,26  | 8,44 | 1,53E-03 | ENSG00000231389 |
| GNG4       | 4,53  | 2,17 | 1,54E-03 | ENSG00000168243 |
| GPC4       | -4,46 | 6,20 | 1,55E-03 | ENSG00000076716 |
| GAPT       | 4,99  | 3,20 | 1,56E-03 | ENSG00000175857 |
| ADAMTS6    | -4,66 | 6,88 | 1,58E-03 | ENSG00000049192 |
| NLRP3P1    | -6,43 | 2,57 | 1,59E-03 | ENSG00000277883 |
| AL512329.2 | -5,32 | 2,10 | 1,59E-03 | ENSG00000272279 |
| SYT12      | 5,29  | 3,97 | 1,61E-03 | ENSG00000173227 |
| KCNH2      | 4,36  | 3,28 | 1,61E-03 | ENSG00000055118 |
| AC012354.1 | -8,68 | 1,96 | 1,63E-03 | ENSG00000225156 |
| CTGF       | 2,88  | 8,32 | 1,65E-03 | ENSG00000118523 |
| PCDH10     | -6,05 | 5,45 | 1,65E-03 | ENSG00000138650 |
| CA9        | -7,37 | 4,62 | 1,65E-03 | ENSG00000107159 |
| SIGIRR     | 3,61  | 7,01 | 1,66E-03 | ENSG00000185187 |
| PRPH       | -5,47 | 6,46 | 1,66E-03 | ENSG00000135406 |
| EMILIN3    | -3,88 | 7,30 | 1,66E-03 | ENSG00000183798 |
| RBM47      | 3,73  | 4,83 | 1,66E-03 | ENSG00000163694 |
| ATP10B     | 8,08  | 1,21 | 1,66E-03 | ENSG00000118322 |
| SEC14L4    | 5,96  | 1,54 | 1,67E-03 | ENSG00000133488 |
| LY6H       | 4,33  | 2,62 | 1,67E-03 | ENSG00000176956 |
| AKAP12     | 3,69  | 7,89 | 1,67E-03 | ENSG00000131016 |
| NAPSB      | 3,95  | 4,33 | 1,68E-03 | ENSG00000131401 |
| LINC01914  | 7,46  | 0,77 | 1,69E-03 | ENSG00000234362 |
| RGBM       | 3,16  | 5,69 | 1,71E-03 | ENSG00000174136 |
| CERS1      | 4,41  | 4,02 | 1,71E-03 | ENSG00000223802 |
| AC010980.1 | -5,82 | 1,40 | 1,72E-03 | ENSG00000237732 |
| SLC9A3-AS1 | -3,18 | 5,78 | 1,72E-03 | ENSG00000225138 |
| PLAGL1     | -2,92 | 8,36 | 1,72E-03 | ENSG00000118495 |
| IGSF9B     | 4,33  | 3,66 | 1,74E-03 | ENSG00000080854 |
| ASPHD1     | 3,85  | 4,23 | 1,74E-03 | ENSG00000174939 |
| FUT8       | 3,10  | 5,56 | 1,75E-03 | ENSG00000033170 |
| CDHR1      | 5,43  | 5,19 | 1,75E-03 | ENSG00000148600 |
| GATA6-AS1  | -3,85 | 4,29 | 1,76E-03 | ENSG00000266010 |
| CADPS      | 4,49  | 2,67 | 1,76E-03 | ENSG00000163618 |
| HOMER1     | 3,52  | 5,44 | 1,77E-03 | ENSG00000152413 |
| MAGEB17    | -5,81 | 2,09 | 1,81E-03 | ENSG00000182798 |
| LINC02434  | 7,81  | 1,13 | 1,81E-03 | ENSG00000248370 |
| CFD        | 3,66  | 5,30 | 1,84E-03 | ENSG00000197766 |
| LAMP5      | -4,85 | 6,51 | 1,86E-03 | ENSG00000125869 |
| PITPNM2    | -3,16 | 6,39 | 1,86E-03 | ENSG00000090975 |
| HS6ST3     | -7,80 | 1,18 | 1,87E-03 | ENSG00000185352 |
| VSTM2L     | 5,26  | 1,71 | 1,87E-03 | ENSG00000132821 |
| SORT1      | 3,09  | 6,32 | 1,87E-03 | ENSG00000134243 |
| PDE10A     | -3,21 | 5,30 | 1,90E-03 | ENSG00000112541 |
| HOXB9      | 6,29  | 1,94 | 1,91E-03 | ENSG00000170689 |
| OR7E14P    | 4,99  | 2,02 | 1,92E-03 | ENSG00000184669 |
| RAB9B      | 4,40  | 2,49 | 1,93E-03 | ENSG00000123570 |
| AHRR       | -3,98 | 4,05 | 1,93E-03 | ENSG00000063438 |
| CCKAR      | -7,78 | 1,15 | 1,94E-03 | ENSG00000163394 |
| VIT        | 5,07  | 2,10 | 1,94E-03 | ENSG00000205221 |
| ZNF704     | -2,95 | 6,71 | 1,99E-03 | ENSG00000164684 |
| S100A1     | 3,45  | 4,39 | 2,00E-03 | ENSG00000160678 |
| ZNF350-AS1 | -4,94 | 1,34 | 2,00E-03 | ENSG00000269235 |
| MEGF11     | -5,51 | 2,26 | 2,05E-03 | ENSG00000157890 |
| LGR5       | -4,24 | 5,40 | 2,07E-03 | ENSG00000139292 |



|            |       |      |          |                 |
|------------|-------|------|----------|-----------------|
| CEACAM1    | -5,94 | 5,83 | 2,09E-03 | ENSG00000079385 |
| GPR153     | -2,86 | 6,87 | 2,09E-03 | ENSG00000158292 |
| NLGN1      | 4,37  | 3,41 | 2,10E-03 | ENSG00000169760 |
| IGSF1      | 4,29  | 4,42 | 2,11E-03 | ENSG00000147255 |
| SERTM1     | -7,31 | 3,90 | 2,12E-03 | ENSG00000180440 |
| AC078993.1 | -4,96 | 3,01 | 2,13E-03 | ENSG00000238178 |
| VGLL3      | 3,29  | 4,54 | 2,15E-03 | ENSG00000206538 |
| MAML3      | 3,81  | 3,90 | 2,19E-03 | ENSG00000196782 |
| HMGA2      | -3,96 | 3,67 | 2,19E-03 | ENSG00000149948 |
| CLDN7      | 3,78  | 4,92 | 2,20E-03 | ENSG00000181885 |
| GRM8       | -5,03 | 4,84 | 2,20E-03 | ENSG00000179603 |
| TARID      | -6,12 | 6,39 | 2,22E-03 | ENSG00000227954 |
| FAM131B    | 4,56  | 3,25 | 2,23E-03 | ENSG00000159784 |
| TMEM229B   | 3,97  | 3,24 | 2,26E-03 | ENSG00000198133 |
| LRRC32     | 2,81  | 6,52 | 2,27E-03 | ENSG00000137507 |
| SORL1      | 3,40  | 5,40 | 2,27E-03 | ENSG00000137642 |
| SEMA6B     | 2,78  | 5,58 | 2,31E-03 | ENSG00000167680 |
| TFCP2L1    | -4,80 | 5,11 | 2,32E-03 | ENSG00000115112 |
| HAPLN1     | -5,66 | 4,86 | 2,34E-03 | ENSG00000145681 |
| AL033530.1 | -8,34 | 1,65 | 2,36E-03 | ENSG00000285407 |
| TAC1       | 4,86  | 1,89 | 2,36E-03 | ENSG00000006128 |
| CTPS1      | -2,78 | 6,82 | 2,37E-03 | ENSG00000171793 |
| AC011893.1 | 7,92  | 1,25 | 2,38E-03 | ENSG00000226806 |
| AC002401.4 | 7,61  | 0,96 | 2,39E-03 | ENSG00000276851 |
| COL8A1     | 3,54  | 7,60 | 2,39E-03 | ENSG00000144810 |
| HIF3A      | -3,18 | 4,84 | 2,40E-03 | ENSG00000124440 |
| PRSS30P    | -4,63 | 3,69 | 2,41E-03 | ENSG00000172460 |
| RAPGEF5    | 3,03  | 4,97 | 2,41E-03 | ENSG00000136237 |
| FPR3       | 3,60  | 3,50 | 2,43E-03 | ENSG00000187474 |
| DRD2       | -8,48 | 1,76 | 2,43E-03 | ENSG00000149295 |
| EBF4       | -2,84 | 5,40 | 2,44E-03 | ENSG00000088881 |
| FGF19      | -6,61 | 6,38 | 2,46E-03 | ENSG00000162344 |
| MCOLN3     | -3,86 | 3,68 | 2,49E-03 | ENSG00000055732 |
| ABCC3      | 3,23  | 5,73 | 2,51E-03 | ENSG00000108846 |
| MEX3A      | -4,91 | 5,39 | 2,52E-03 | ENSG00000254726 |
| KBTBD12    | -3,38 | 4,28 | 2,52E-03 | ENSG00000187715 |
| GAL3ST1    | 4,63  | 3,14 | 2,53E-03 | ENSG00000128242 |
| KIAA1549   | -3,42 | 5,07 | 2,54E-03 | ENSG00000122778 |
| NYAP2      | -8,27 | 1,59 | 2,57E-03 | ENSG00000144460 |
| SGK1       | 3,26  | 7,58 | 2,58E-03 | ENSG00000118515 |
| SLC16A14   | 3,50  | 3,89 | 2,58E-03 | ENSG00000163053 |
| EPHX3      | 5,43  | 2,48 | 2,58E-03 | ENSG00000105131 |
| CRTAC1     | 4,12  | 2,80 | 2,62E-03 | ENSG00000095713 |
| ISM2       | -7,52 | 0,92 | 2,63E-03 | ENSG00000100593 |
| NUAK2      | 4,33  | 2,52 | 2,63E-03 | ENSG00000163545 |
| KLHL14     | -5,41 | 4,44 | 2,65E-03 | ENSG00000197705 |
| UBASH3B    | 3,68  | 3,90 | 2,66E-03 | ENSG00000154127 |
| AF165147.1 | -6,53 | 2,02 | 2,69E-03 | ENSG00000232855 |
| LYZ        | 2,85  | 5,19 | 2,70E-03 | ENSG00000090382 |
| HLA-G      | -4,13 | 3,24 | 2,71E-03 | ENSG00000204632 |
| MAATS1     | -3,24 | 4,70 | 2,73E-03 | ENSG00000183833 |
| HERC2P3    | -3,79 | 6,57 | 2,73E-03 | ENSG00000180229 |
| SORCS2     | -4,02 | 7,11 | 2,73E-03 | ENSG00000184985 |
| CFL2       | 3,37  | 7,55 | 2,76E-03 | ENSG00000165410 |
| B3GAT1     | 4,19  | 4,08 | 2,77E-03 | ENSG00000109956 |
| GNAO1      | -5,62 | 6,67 | 2,78E-03 | ENSG00000087258 |
| LYPD8      | -4,76 | 1,61 | 2,79E-03 | ENSG00000259823 |
| ESRP1      | -7,54 | 5,21 | 2,80E-03 | ENSG00000104413 |
| KHDRBS2    | -6,08 | 2,31 | 2,81E-03 | ENSG00000112232 |
| CLEC18B    | 3,44  | 4,22 | 2,81E-03 | ENSG00000140839 |
| CHST6      | 3,60  | 3,43 | 2,82E-03 | ENSG00000183196 |
| AC243547.1 | -4,91 | 5,48 | 2,83E-03 | ENSG00000244619 |
| HPN-AS1    | 5,80  | 1,48 | 2,84E-03 | ENSG00000227392 |
| ZDHHC8P1   | 5,89  | 4,04 | 2,84E-03 | ENSG00000133519 |

|            |       |      |          |                 |
|------------|-------|------|----------|-----------------|
| SIX3       | -7,52 | 5,19 | 2,87E-03 | ENSG00000138083 |
| RPSAP52    | -7,13 | 0,61 | 2,88E-03 | ENSG00000241749 |
| ACTN2      | -5,50 | 4,01 | 2,88E-03 | ENSG00000077522 |
| AC021683.1 | -3,68 | 3,93 | 2,89E-03 | ENSG00000267466 |
| AP001180.4 | -4,96 | 1,78 | 2,89E-03 | ENSG00000264843 |
| CPAMD8     | -3,36 | 5,57 | 2,89E-03 | ENSG00000160111 |
| AL445253.1 | -4,57 | 3,76 | 2,92E-03 | ENSG00000285873 |
| AC055854.1 | 4,20  | 2,13 | 2,92E-03 | ENSG00000253125 |
| SYPL2      | 4,46  | 3,29 | 2,92E-03 | ENSG00000143028 |
| METTL7B    | 3,40  | 4,05 | 2,93E-03 | ENSG00000170439 |
| RDH10      | 3,20  | 5,31 | 2,94E-03 | ENSG00000121039 |
| THBS1      | 2,84  | 8,38 | 3,01E-03 | ENSG00000137801 |
| PTGER3     | -3,48 | 5,61 | 3,07E-03 | ENSG00000050628 |
| C2orf66    | -4,72 | 4,86 | 3,09E-03 | ENSG00000187944 |
| BEX1       | 6,64  | 3,02 | 3,10E-03 | ENSG00000133169 |
| MEG3       | -3,02 | 9,69 | 3,12E-03 | ENSG00000214548 |
| KRT7-AS    | 6,39  | 1,88 | 3,15E-03 | ENSG00000257671 |
| BIRC3      | 2,98  | 5,85 | 3,16E-03 | ENSG00000023445 |
| CXADR      | 3,95  | 2,86 | 3,21E-03 | ENSG00000154639 |
| CST2       | 4,07  | 2,36 | 3,22E-03 | ENSG00000170369 |
| ACVR1C     | -7,14 | 3,51 | 3,22E-03 | ENSG00000123612 |
| PRPH2      | 5,28  | 2,34 | 3,22E-03 | ENSG00000112619 |
| AC009065.5 | -5,12 | 1,48 | 3,23E-03 | ENSG00000261123 |
| VSTM2A     | -7,87 | 1,24 | 3,23E-03 | ENSG00000170419 |
| PTX3       | -5,71 | 7,03 | 3,24E-03 | ENSG00000163661 |
| AC092969.1 | -7,45 | 0,88 | 3,29E-03 | ENSG00000240086 |
| MEIS1      | -2,73 | 5,29 | 3,33E-03 | ENSG00000143995 |
| DAG1       | 3,21  | 8,36 | 3,34E-03 | ENSG00000173402 |
| PRUNE2     | 3,54  | 7,46 | 3,35E-03 | ENSG00000106772 |
| ACSM5      | 3,81  | 4,06 | 3,35E-03 | ENSG00000183549 |
| TRPM8      | 4,67  | 2,11 | 3,37E-03 | ENSG00000144481 |
| WNT4       | -4,63 | 7,48 | 3,38E-03 | ENSG00000162552 |
| KLRB1      | 4,32  | 2,06 | 3,39E-03 | ENSG00000111796 |
| AKR1B10    | 5,65  | 1,34 | 3,40E-03 | ENSG00000198074 |
| CPB1       | -8,03 | 1,38 | 3,40E-03 | ENSG00000153002 |
| ANKRD65    | 3,50  | 3,86 | 3,41E-03 | ENSG00000235098 |
| GALNTL6    | -4,00 | 4,02 | 3,42E-03 | ENSG00000174473 |
| NPNT       | -5,37 | 8,37 | 3,43E-03 | ENSG00000168743 |
| NFATC1     | -3,54 | 7,17 | 3,43E-03 | ENSG00000131196 |
| SSPN       | 3,15  | 5,06 | 3,45E-03 | ENSG00000123096 |
| FOXS1      | 3,09  | 4,66 | 3,45E-03 | ENSG00000179772 |
| PKHD1L1    | -6,84 | 4,49 | 3,50E-03 | ENSG00000205038 |
| INSC       | 4,73  | 2,66 | 3,51E-03 | ENSG00000188487 |
| DUX4L37    | -6,46 | 1,96 | 3,52E-03 | ENSG00000283020 |
| NEGR1      | -3,95 | 7,21 | 3,53E-03 | ENSG00000172260 |
| MUC1       | -2,85 | 5,69 | 3,53E-03 | ENSG00000185499 |
| APOE       | 3,01  | 6,59 | 3,55E-03 | ENSG00000130203 |
| CD1D       | 3,84  | 2,95 | 3,55E-03 | ENSG00000158473 |
| PPM1E      | 3,85  | 3,62 | 3,57E-03 | ENSG00000175175 |
| APOC1      | 4,63  | 2,69 | 3,58E-03 | ENSG00000130208 |
| AC015802.1 | 4,31  | 1,72 | 3,59E-03 | ENSG00000267078 |
| B3GALNT1   | -2,81 | 5,39 | 3,62E-03 | ENSG00000169255 |
| WNT5A      | -3,32 | 4,24 | 3,64E-03 | ENSG00000114251 |
| OCSTAMP    | 6,10  | 1,78 | 3,64E-03 | ENSG00000149635 |
| DHRS3      | 2,79  | 6,02 | 3,67E-03 | ENSG00000162496 |
| TLR7       | 3,81  | 3,30 | 3,67E-03 | ENSG00000196664 |
| GOLGA6L9   | -3,57 | 5,03 | 3,68E-03 | ENSG00000197978 |
| CCDC144B   | -4,29 | 1,77 | 3,70E-03 | ENSG00000154874 |
| SCML2      | -4,63 | 2,61 | 3,70E-03 | ENSG00000102098 |
| AL024497.2 | -6,51 | 3,46 | 3,71E-03 | ENSG00000234567 |
| ADAP1      | 3,48  | 3,63 | 3,72E-03 | ENSG00000105963 |
| XKR8       | -3,34 | 5,96 | 3,73E-03 | ENSG00000158156 |
| KLHL30     | 4,59  | 2,13 | 3,75E-03 | ENSG00000168427 |
| LINC02452  | 4,83  | 2,29 | 3,78E-03 | ENSG00000283422 |

|            |       |       |          |                 |
|------------|-------|-------|----------|-----------------|
| OCLN       | 4,67  | 1,67  | 3,80E-03 | ENSG00000197822 |
| HS3ST1     | -3,12 | 5,38  | 3,80E-03 | ENSG00000002587 |
| TIMP3      | 3,16  | 9,58  | 3,80E-03 | ENSG00000100234 |
| AL035446.1 | -5,43 | 1,74  | 3,86E-03 | ENSG00000234147 |
| PCSK7      | 2,71  | 9,36  | 3,86E-03 | ENSG00000160613 |
| PDK3       | -3,02 | 4,74  | 3,86E-03 | ENSG00000067992 |
| COL9A1     | -5,07 | 5,01  | 3,86E-03 | ENSG00000112280 |
| RALGPS2    | 3,24  | 3,91  | 3,87E-03 | ENSG00000116191 |
| RASSF2     | 2,71  | 5,62  | 3,88E-03 | ENSG00000101265 |
| BANCR      | 5,62  | 1,24  | 3,89E-03 | ENSG00000278910 |
| CNN2       | 2,58  | 6,46  | 3,89E-03 | ENSG00000064666 |
| C5AR2      | -4,99 | 5,56  | 3,91E-03 | ENSG00000134830 |
| RPRM       | -6,00 | 3,25  | 3,92E-03 | ENSG00000177519 |
| AC084816.1 | -6,59 | 3,50  | 3,94E-03 | ENSG00000256995 |
| PGAP1      | -2,91 | 6,59  | 3,97E-03 | ENSG00000197121 |
| AC254629.1 | 4,37  | 2,38  | 3,98E-03 | ENSG00000274993 |
| AC009902.2 | 3,58  | 3,07  | 4,08E-03 | ENSG00000254027 |
| PTH2R      | -5,77 | 3,52  | 4,09E-03 | ENSG00000144407 |
| OR51E1     | 4,21  | 1,66  | 4,10E-03 | ENSG00000180785 |
| PLIN4      | 3,83  | 3,54  | 4,12E-03 | ENSG00000167676 |
| SLFN5      | 2,89  | 6,18  | 4,14E-03 | ENSG00000166750 |
| STAB2      | -3,76 | 2,70  | 4,14E-03 | ENSG00000136011 |
| AC068700.1 | 7,05  | 0,44  | 4,14E-03 | ENSG00000260398 |
| SLC27A6    | -6,19 | 5,39  | 4,16E-03 | ENSG00000113396 |
| GRPR       | -5,85 | 2,54  | 4,19E-03 | ENSG00000126010 |
| DCHS2      | -4,52 | 3,72  | 4,21E-03 | ENSG00000197410 |
| PHKA2-AS1  | -2,53 | 5,90  | 4,23E-03 | ENSG00000237836 |
| ASS1       | -3,74 | 8,75  | 4,23E-03 | ENSG00000130707 |
| CSRP1      | 2,86  | 9,14  | 4,24E-03 | ENSG00000159176 |
| PGR        | -4,60 | 4,62  | 4,24E-03 | ENSG00000082175 |
| LY86       | 3,65  | 3,44  | 4,27E-03 | ENSG00000112799 |
| ASIC2      | -4,93 | 1,31  | 4,27E-03 | ENSG00000108684 |
| AL109615.3 | -4,57 | 2,15  | 4,27E-03 | ENSG00000237686 |
| MAMDC4     | -3,01 | 6,88  | 4,32E-03 | ENSG00000177943 |
| LAMC3      | -3,18 | 5,29  | 4,33E-03 | ENSG00000050555 |
| IGF2BP1    | 5,21  | 2,46  | 4,34E-03 | ENSG00000159217 |
| FCER1A     | 3,55  | 2,88  | 4,36E-03 | ENSG00000179639 |
| ARHGAP19   | 2,96  | 5,35  | 4,36E-03 | ENSG00000213390 |
| LINC0001   | 4,61  | 4,21  | 4,36E-03 | ENSG00000253641 |
| OPN3       | 3,39  | 4,15  | 4,38E-03 | ENSG00000054277 |
| LINC02285  | 5,54  | 1,16  | 4,41E-03 | ENSG00000259004 |
| ARFGEF3    | -4,08 | 4,76  | 4,42E-03 | ENSG00000112379 |
| GSG1L      | -6,29 | 4,76  | 4,45E-03 | ENSG00000169181 |
| AC022706.1 | 4,49  | 3,39  | 4,46E-03 | ENSG00000267364 |
| SMTN       | 2,71  | 7,56  | 4,48E-03 | ENSG00000183963 |
| SPARC      | 2,68  | 11,40 | 4,51E-03 | ENSG00000113140 |
| PLEKHN1    | -3,36 | 3,63  | 4,52E-03 | ENSG00000187583 |
| ZBTB42     | 3,42  | 3,88  | 4,53E-03 | ENSG00000179627 |
| PHKA2      | -2,58 | 7,07  | 4,54E-03 | ENSG00000044446 |
| SEMA3A     | 3,98  | 2,80  | 4,54E-03 | ENSG00000075213 |
| HLA-DRB5   | 2,83  | 5,77  | 4,55E-03 | ENSG00000198502 |
| C1orf226   | -3,19 | 4,01  | 4,56E-03 | ENSG00000239887 |
| VWCE       | 2,90  | 4,53  | 4,57E-03 | ENSG00000167992 |
| SYN3       | 4,30  | 1,68  | 4,59E-03 | ENSG00000185666 |
| C1orf61    | 4,11  | 3,01  | 4,60E-03 | ENSG00000125462 |
| TRDC       | -5,41 | 4,66  | 4,60E-03 | ENSG00000211829 |
| SLC24A4    | -4,45 | 3,91  | 4,63E-03 | ENSG00000140090 |
| C8orf34    | -7,43 | 0,87  | 4,64E-03 | ENSG00000165084 |
| F2RL2      | -3,05 | 5,19  | 4,69E-03 | ENSG00000164220 |
| KLHL23     | 3,36  | 5,87  | 4,73E-03 | ENSG00000213160 |
| RNF133     | -7,75 | 1,13  | 4,76E-03 | ENSG00000188050 |
| FNDC10     | 3,31  | 3,60  | 4,76E-03 | ENSG00000228594 |
| ADAMTSL4   | -2,81 | 5,65  | 4,77E-03 | ENSG00000143382 |
| RPL23AP25  | -7,25 | 0,71  | 4,78E-03 | ENSG00000233084 |

|              |       |      |          |                 |
|--------------|-------|------|----------|-----------------|
| AC073133.1   | -6,87 | 0,40 | 4,79E-03 | ENSG00000228569 |
| XDH          | -5,02 | 1,82 | 4,81E-03 | ENSG00000158125 |
| SLC6A4       | -5,21 | 4,58 | 4,82E-03 | ENSG00000108576 |
| AC005220.1   | 4,51  | 0,94 | 4,84E-03 | ENSG00000236352 |
| GPM6A        | -5,57 | 5,10 | 4,84E-03 | ENSG00000150625 |
| RASGRF1      | 5,05  | 4,19 | 4,85E-03 | ENSG00000058335 |
| AL590652.1   | -4,51 | 0,98 | 4,87E-03 | ENSG00000227885 |
| HHEX         | 3,11  | 4,02 | 4,88E-03 | ENSG00000152804 |
| NKD2         | -3,45 | 6,72 | 4,89E-03 | ENSG00000145506 |
| HMOX1        | 2,91  | 4,54 | 4,94E-03 | ENSG00000100292 |
| INHBA        | -2,65 | 6,47 | 4,94E-03 | ENSG00000122641 |
| FEZF1        | -7,70 | 1,09 | 4,95E-03 | ENSG00000128610 |
| SCN9A        | 3,99  | 4,02 | 4,96E-03 | ENSG00000169432 |
| LAMP5-AS1    | -6,18 | 3,10 | 4,96E-03 | ENSG00000225988 |
| VIPR2        | 4,23  | 5,11 | 4,99E-03 | ENSG00000106018 |
| AL157955.1   | 5,32  | 0,96 | 4,99E-03 | ENSG00000258407 |
| AC016735.1   | 6,90  | 0,32 | 5,00E-03 | ENSG00000224739 |
| AL136379.1   | -5,91 | 1,47 | 5,00E-03 | ENSG00000276255 |
| PCSK2        | -5,49 | 2,38 | 5,04E-03 | ENSG00000125851 |
| CAMKK1       | 2,82  | 6,67 | 5,05E-03 | ENSG00000004660 |
| AC008074.2   | 3,93  | 2,97 | 5,06E-03 | ENSG00000260101 |
| SRD5A2       | -5,92 | 1,47 | 5,07E-03 | ENSG00000277893 |
| MCAM         | 2,71  | 8,13 | 5,09E-03 | ENSG00000007606 |
| FILIP1L      | 2,47  | 5,75 | 5,14E-03 | ENSG00000168386 |
| IRS4         | -7,26 | 3,71 | 5,17E-03 | ENSG00000133124 |
| UNC13C       | -5,01 | 2,79 | 5,21E-03 | ENSG00000137766 |
| PLXNA3       | -2,84 | 7,67 | 5,25E-03 | ENSG00000130827 |
| GLCCI1       | -2,64 | 5,14 | 5,26E-03 | ENSG00000106415 |
| TPX2         | -2,72 | 4,85 | 5,28E-03 | ENSG00000088325 |
| RPP25        | 3,14  | 4,19 | 5,30E-03 | ENSG00000178718 |
| RASSF10      | -5,45 | 2,19 | 5,30E-03 | ENSG00000189431 |
| KIF5C        | -4,17 | 5,15 | 5,34E-03 | ENSG00000168280 |
| SLC9B2       | -3,13 | 4,86 | 5,34E-03 | ENSG00000164038 |
| RGS1         | 2,94  | 7,05 | 5,36E-03 | ENSG00000090104 |
| DOC2B        | -3,24 | 6,73 | 5,37E-03 | ENSG00000272636 |
| GPR137B      | 2,87  | 4,93 | 5,38E-03 | ENSG00000077585 |
| SLC5A8       | -7,22 | 3,67 | 5,39E-03 | ENSG00000256870 |
| GIMAP4       | 2,62  | 5,16 | 5,39E-03 | ENSG00000133574 |
| KRT81        | 6,85  | 3,24 | 5,42E-03 | ENSG00000205426 |
| SPINT1       | 3,56  | 4,18 | 5,45E-03 | ENSG00000166145 |
| DMRT2        | -5,28 | 5,22 | 5,46E-03 | ENSG00000173253 |
| A1CF         | -6,29 | 1,80 | 5,46E-03 | ENSG00000148584 |
| HAMP         | 4,72  | 1,81 | 5,46E-03 | ENSG00000105697 |
| SLFN1L       | -3,88 | 2,64 | 5,46E-03 | ENSG00000171790 |
| PROX1        | -4,83 | 4,02 | 5,49E-03 | ENSG00000117707 |
| AC005392.3   | 5,28  | 0,91 | 5,50E-03 | ENSG00000272396 |
| PBX3         | -2,92 | 7,13 | 5,51E-03 | ENSG00000167081 |
| TLR10        | 4,18  | 1,92 | 5,52E-03 | ENSG00000174123 |
| AMZ1         | 4,48  | 2,39 | 5,52E-03 | ENSG00000174945 |
| GFRA3        | 4,04  | 2,53 | 5,54E-03 | ENSG00000146013 |
| NAP1L3       | 3,39  | 3,99 | 5,54E-03 | ENSG00000186310 |
| MAPK4        | 5,79  | 3,03 | 5,57E-03 | ENSG00000141639 |
| VASN         | -2,92 | 7,11 | 5,58E-03 | ENSG00000168140 |
| LINC02091    | -7,13 | 0,60 | 5,59E-03 | ENSG00000273172 |
| CST4         | 6,05  | 3,34 | 5,65E-03 | ENSG00000101441 |
| AL449403.1   | 6,21  | 3,09 | 5,69E-03 | ENSG00000237212 |
| CTB-178M22.2 | -6,18 | 1,68 | 5,72E-03 | ENSG00000253978 |
| INTU         | -2,79 | 6,00 | 5,77E-03 | ENSG00000164066 |
| NOS1AP       | -5,15 | 2,05 | 5,80E-03 | ENSG00000198929 |
| ADCY2        | -3,39 | 5,90 | 5,81E-03 | ENSG00000078295 |
| P2RY13       | 3,66  | 3,33 | 5,82E-03 | ENSG00000181631 |
| HLA-DQA1     | 2,60  | 5,91 | 5,85E-03 | ENSG00000196735 |
| CHTF18       | -2,85 | 6,54 | 5,87E-03 | ENSG00000127586 |
| AC007639.1   | 7,18  | 0,60 | 5,89E-03 | ENSG00000263680 |

|            |       |      |          |                 |
|------------|-------|------|----------|-----------------|
| CNKSRI     | -4,26 | 5,00 | 5,90E-03 | ENSG00000142675 |
| PCSK1N     | 4,09  | 2,12 | 5,90E-03 | ENSG00000102109 |
| STEAP4     | 2,74  | 5,18 | 5,91E-03 | ENSG00000127954 |
| AC093607.1 | -6,73 | 0,30 | 5,92E-03 | ENSG00000250137 |
| AC090921.1 | -4,74 | 1,86 | 5,95E-03 | ENSG00000214803 |
| ISL1       | -6,46 | 4,11 | 5,96E-03 | ENSG00000016082 |
| PTH1R      | -2,88 | 5,53 | 5,97E-03 | ENSG00000160801 |
| CCDC141    | -5,42 | 3,39 | 5,98E-03 | ENSG00000163492 |
| PHF24      | 4,35  | 2,59 | 5,98E-03 | ENSG00000122733 |
| AC112721.2 | 5,43  | 1,16 | 6,03E-03 | ENSG00000222032 |
| SPTLC3     | -2,88 | 4,61 | 6,07E-03 | ENSG00000172296 |
| LRTM2      | 6,14  | 3,49 | 6,07E-03 | ENSG00000166159 |
| FCGR3A     | 2,72  | 5,25 | 6,08E-03 | ENSG00000203747 |
| SOBP       | -2,56 | 5,58 | 6,10E-03 | ENSG00000112320 |
| FZD10-DT   | -3,34 | 5,07 | 6,11E-03 | ENSG00000250208 |
| SLCO5A1    | -4,35 | 4,59 | 6,12E-03 | ENSG00000137571 |
| ATF3       | 2,56  | 6,88 | 6,13E-03 | ENSG00000162772 |
| GREM1      | -4,82 | 4,59 | 6,13E-03 | ENSG00000166923 |
| CELSR1     | -2,84 | 5,69 | 6,13E-03 | ENSG00000075275 |
| PRRT1      | -3,64 | 6,26 | 6,13E-03 | ENSG00000204314 |
| LINC00689  | 4,03  | 4,74 | 6,16E-03 | ENSG00000231419 |
| SFRP4      | 2,81  | 7,91 | 6,17E-03 | ENSG00000106483 |
| SLCO1B3    | -6,83 | 0,38 | 6,18E-03 | ENSG00000111700 |
| GPC1       | 2,82  | 7,71 | 6,20E-03 | ENSG00000063660 |
| WDR97      | -3,26 | 4,01 | 6,20E-03 | ENSG00000179698 |
| LINC02593  | -4,07 | 5,63 | 6,20E-03 | ENSG00000223764 |
| ELFN1-AS1  | -5,68 | 1,89 | 6,21E-03 | ENSG00000236081 |
| MYL9       | 2,52  | 9,00 | 6,23E-03 | ENSG00000101335 |
| MXRA7      | 2,62  | 7,18 | 6,24E-03 | ENSG00000182534 |
| TP53I3     | 2,54  | 7,30 | 6,24E-03 | ENSG00000115129 |
| DDX11      | -2,53 | 5,38 | 6,26E-03 | ENSG00000013573 |
| AC133065.1 | 5,30  | 1,79 | 6,29E-03 | ENSG00000262151 |
| MLIP       | 7,13  | 0,56 | 6,31E-03 | ENSG00000146147 |
| MYOC       | -6,24 | 6,80 | 6,32E-03 | ENSG00000034971 |
| IL33       | 3,45  | 6,19 | 6,34E-03 | ENSG00000137033 |
| PKP3       | 5,18  | 2,21 | 6,35E-03 | ENSG00000184363 |
| DRP2       | 3,75  | 2,72 | 6,41E-03 | ENSG00000102385 |
| GREB1L     | -7,05 | 3,51 | 6,46E-03 | ENSG00000141449 |
| KLHL26     | 2,88  | 5,39 | 6,46E-03 | ENSG00000167487 |
| RNF128     | 4,97  | 1,43 | 6,46E-03 | ENSG00000133135 |
| C4orf3     | 2,44  | 7,37 | 6,49E-03 | ENSG00000164096 |
| ETV4       | -2,48 | 5,45 | 6,49E-03 | ENSG00000175832 |
| FAM107A    | 3,72  | 6,21 | 6,50E-03 | ENSG00000168309 |
| RDH8       | 5,13  | 1,70 | 6,52E-03 | ENSG00000080511 |
| LINC02253  | -5,34 | 1,65 | 6,54E-03 | ENSG00000259485 |
| RF01888    | -7,23 | 0,70 | 6,60E-03 | ENSG00000277124 |
| AC002398.2 | 2,80  | 5,15 | 6,61E-03 | ENSG00000267328 |
| SV2C       | -5,41 | 3,44 | 6,62E-03 | ENSG00000122012 |
| PXDN       | -2,58 | 8,33 | 6,62E-03 | ENSG00000130508 |
| REEP2      | 3,05  | 5,75 | 6,62E-03 | ENSG00000132563 |
| AP002800.1 | -5,91 | 2,83 | 6,63E-03 | ENSG00000280032 |
| NPHP4      | -3,19 | 6,85 | 6,63E-03 | ENSG00000131697 |
| SERPINA1   | 3,08  | 3,72 | 6,65E-03 | ENSG00000197249 |
| TNFSF10    | 2,71  | 4,87 | 6,66E-03 | ENSG00000121858 |
| HTN3       | 6,71  | 5,83 | 6,69E-03 | ENSG00000205649 |
| AC244021.1 | 3,95  | 2,62 | 6,69E-03 | ENSG00000227082 |
| OBSCN      | -2,79 | 7,63 | 6,71E-03 | ENSG00000154358 |
| CD48       | 3,39  | 3,00 | 6,72E-03 | ENSG00000117091 |
| AC106872.5 | 7,10  | 0,54 | 6,73E-03 | ENSG00000248632 |
| RHOXF1-AS1 | -3,85 | 1,58 | 6,73E-03 | ENSG00000258545 |
| CEP126     | -2,73 | 5,44 | 6,77E-03 | ENSG00000110318 |
| AL139351.1 | -7,56 | 0,96 | 6,79E-03 | ENSG00000276923 |
| APOBEC3B   | 4,46  | 1,76 | 6,83E-03 | ENSG00000179750 |
| JPH2       | 3,11  | 3,50 | 6,84E-03 | ENSG00000149596 |

|            |       |      |          |                  |
|------------|-------|------|----------|------------------|
| FAXC       | 4,15  | 2,97 | 6,84E-03 | ENSG00000146267  |
| MAST1      | 4,37  | 1,34 | 6,85E-03 | ENSG00000105613  |
| AC063960.2 | -5,04 | 3,50 | 6,85E-03 | ENSG00000285973  |
| PTPRN      | 4,64  | 2,87 | 6,86E-03 | ENSG000000054356 |
| RGS11      | -2,59 | 7,31 | 6,90E-03 | ENSG000000076344 |
| HES6       | 3,36  | 2,98 | 6,91E-03 | ENSG00000144485  |
| DNER       | -5,14 | 2,92 | 6,95E-03 | ENSG00000187957  |
| SELE       | 5,57  | 2,52 | 6,96E-03 | ENSG000000007908 |
| MTTP       | -4,16 | 2,77 | 6,98E-03 | ENSG00000138823  |
| CLDN5      | 2,71  | 5,42 | 6,98E-03 | ENSG00000184113  |
| TCEAL7     | 3,79  | 4,01 | 7,00E-03 | ENSG00000182916  |
| PYGB       | 2,72  | 8,25 | 7,02E-03 | ENSG00000100994  |
| SPINK5     | -4,27 | 1,20 | 7,04E-03 | ENSG00000133710  |
| LINC01605  | 4,26  | 1,93 | 7,05E-03 | ENSG00000253161  |
| FBN2       | -3,89 | 5,66 | 7,05E-03 | ENSG00000138829  |
| SLFN1-AS1  | -2,74 | 4,55 | 7,06E-03 | ENSG00000281207  |
| ICAM5      | 3,76  | 2,54 | 7,06E-03 | ENSG00000105376  |
| POLE       | -2,80 | 6,97 | 7,07E-03 | ENSG00000177084  |
| FLJ16779   | 5,37  | 1,03 | 7,08E-03 | ENSG00000275620  |
| FGL1       | -3,80 | 1,85 | 7,08E-03 | ENSG00000104760  |
| GPIHBP1    | 3,36  | 3,28 | 7,12E-03 | ENSG00000277494  |
| PRAME      | -4,94 | 7,18 | 7,15E-03 | ENSG00000185686  |
| AGPAT4     | -2,65 | 6,62 | 7,16E-03 | ENSG000000026652 |
| CD74       | 2,62  | 9,99 | 7,16E-03 | ENSG000000019582 |
| TAGAP      | 3,31  | 3,44 | 7,19E-03 | ENSG00000164691  |
| MAEL       | 4,89  | 1,47 | 7,22E-03 | ENSG00000143194  |
| DNAH8      | -5,08 | 3,11 | 7,26E-03 | ENSG00000124721  |
| AF001548.1 | 2,93  | 3,85 | 7,39E-03 | ENSG00000263065  |
| PPL        | 3,21  | 4,22 | 7,40E-03 | ENSG00000118898  |
| WDR86-AS1  | 5,36  | 1,68 | 7,46E-03 | ENSG00000243836  |
| SFRP1      | 2,58  | 6,21 | 7,47E-03 | ENSG00000104332  |
| SEMA5A     | -2,92 | 5,96 | 7,48E-03 | ENSG00000112902  |
| UBXN10-AS1 | 4,73  | 1,26 | 7,48E-03 | ENSG00000225986  |
| AC036108.2 | 2,90  | 4,12 | 7,50E-03 | ENSG00000261054  |
| NKX2-5     | -6,01 | 1,56 | 7,57E-03 | ENSG00000183072  |
| RORC       | 5,04  | 0,71 | 7,58E-03 | ENSG00000143365  |
| L1CAM      | 3,70  | 3,21 | 7,58E-03 | ENSG00000198910  |
| ACP7       | 4,17  | 1,29 | 7,60E-03 | ENSG00000183760  |
| JAKMIP3    | -3,10 | 3,51 | 7,64E-03 | ENSG00000188385  |
| P3H3       | -2,47 | 6,71 | 7,64E-03 | ENSG00000110811  |
| STOX1      | -5,76 | 3,68 | 7,69E-03 | ENSG00000165730  |
| TMEM52B    | 6,97  | 0,43 | 7,71E-03 | ENSG00000165685  |
| PIK3C2G    | -5,65 | 5,24 | 7,72E-03 | ENSG00000139144  |
| HTR2A      | -4,55 | 1,71 | 7,74E-03 | ENSG00000102468  |
| GPR65      | 3,63  | 2,61 | 7,75E-03 | ENSG00000140030  |
| MUC4       | -5,17 | 5,15 | 7,78E-03 | ENSG00000145113  |
| TEPP       | 4,07  | 1,18 | 7,81E-03 | ENSG00000159648  |
| KCNT2      | -3,59 | 5,48 | 7,81E-03 | ENSG00000162687  |
| PKN2-AS1   | -4,45 | 0,93 | 7,83E-03 | ENSG00000237505  |
| AC233266.2 | -4,21 | 1,68 | 7,84E-03 | ENSG00000261600  |
| PTPN14     | -2,58 | 7,11 | 7,85E-03 | ENSG00000152104  |
| AL391845.2 | 4,58  | 2,50 | 7,85E-03 | ENSG00000233542  |
| ITIH5      | -4,49 | 8,34 | 7,89E-03 | ENSG00000123243  |
| HMGN2P15   | -4,60 | 3,86 | 7,89E-03 | ENSG00000214578  |
| LINC02587  | -5,25 | 2,81 | 7,90E-03 | ENSG00000229108  |
| ROBO1      | -2,51 | 6,29 | 7,91E-03 | ENSG00000169855  |
| MSX2       | -5,19 | 4,19 | 7,91E-03 | ENSG00000120149  |
| ABCC1      | -2,61 | 7,05 | 7,91E-03 | ENSG00000103222  |
| AC024267.6 | -2,90 | 3,97 | 7,93E-03 | ENSG00000266642  |
| COL11A1    | 4,21  | 8,42 | 7,96E-03 | ENSG00000060718  |
| PTK2B      | 2,63  | 5,89 | 8,01E-03 | ENSG00000120899  |
| INHBB      | 2,61  | 4,75 | 8,02E-03 | ENSG00000163083  |
| FTH1P10    | 4,76  | 1,24 | 8,05E-03 | ENSG00000223361  |
| IRX4       | 6,30  | 5,09 | 8,05E-03 | ENSG00000113430  |

|            |       |       |          |                 |
|------------|-------|-------|----------|-----------------|
| ARHGEF26   | -3,10 | 4,39  | 8,05E-03 | ENSG00000114790 |
| HSPB6      | 2,61  | 5,40  | 8,06E-03 | ENSG00000004776 |
| SVIP       | 3,15  | 5,72  | 8,06E-03 | ENSG00000198168 |
| AL450405.1 | 2,97  | 3,71  | 8,11E-03 | ENSG00000230202 |
| TCF7       | 2,81  | 5,33  | 8,12E-03 | ENSG00000081059 |
| MAMDC2     | -2,65 | 4,73  | 8,18E-03 | ENSG00000165072 |
| TMEM163    | -3,87 | 4,24  | 8,22E-03 | ENSG00000152128 |
| AC112255.1 | 5,28  | 0,95  | 8,24E-03 | ENSG00000279024 |
| FMOD       | -3,14 | 8,45  | 8,27E-03 | ENSG00000122176 |
| TGM2       | -4,08 | 9,72  | 8,28E-03 | ENSG00000198959 |
| CTXN1      | 3,42  | 4,13  | 8,37E-03 | ENSG00000178531 |
| AL590617.2 | -3,41 | 5,88  | 8,37E-03 | ENSG00000225177 |
| CAVIN1     | 2,40  | 9,19  | 8,38E-03 | ENSG00000177469 |
| EGFR       | -2,31 | 5,84  | 8,39E-03 | ENSG00000146648 |
| GLCE       | 2,68  | 5,73  | 8,46E-03 | ENSG00000138604 |
| SRGAP2C    | 2,65  | 5,10  | 8,47E-03 | ENSG00000171943 |
| LIF        | 2,77  | 4,63  | 8,48E-03 | ENSG00000128342 |
| MADCAM1    | -3,74 | 2,59  | 8,50E-03 | ENSG00000099866 |
| HOXC13     | -5,19 | 2,25  | 8,51E-03 | ENSG00000123364 |
| PHACTR1    | -2,42 | 5,34  | 8,54E-03 | ENSG00000112137 |
| HOXD10     | -4,03 | 2,71  | 8,55E-03 | ENSG00000128710 |
| RGS18      | 3,57  | 1,74  | 8,58E-03 | ENSG00000150681 |
| COL4A5     | -2,92 | 5,79  | 8,75E-03 | ENSG00000188153 |
| INAFM2     | 2,61  | 4,82  | 8,75E-03 | ENSG00000259330 |
| AC110048.2 | -7,34 | 0,77  | 8,76E-03 | ENSG00000277152 |
| ASIC3      | -2,96 | 3,99  | 8,78E-03 | ENSG00000213199 |
| HES2       | 5,23  | 4,31  | 8,79E-03 | ENSG00000069812 |
| DNAJC6     | 3,84  | 4,30  | 8,80E-03 | ENSG00000116675 |
| TDRD6      | -4,50 | 3,42  | 8,80E-03 | ENSG00000180113 |
| SNTB2      | 2,49  | 6,76  | 8,80E-03 | ENSG00000168807 |
| TENM1      | -3,35 | 4,65  | 8,82E-03 | ENSG00000009694 |
| AL121929.2 | -4,73 | 2,71  | 8,82E-03 | ENSG00000273108 |
| KCNH8      | 4,46  | 0,96  | 8,83E-03 | ENSG00000183960 |
| FTH1       | 2,42  | 10,68 | 8,84E-03 | ENSG00000167996 |
| SMC1B      | -5,68 | 1,27  | 8,86E-03 | ENSG00000077935 |
| SMR3B      | 6,66  | 6,27  | 8,90E-03 | ENSG00000171201 |
| HLA-DOA    | 2,99  | 4,37  | 8,91E-03 | ENSG00000204252 |
| CHST3      | 2,75  | 7,41  | 8,93E-03 | ENSG00000122863 |
| AC245060.5 | -3,32 | 3,05  | 8,94E-03 | ENSG00000274422 |
| SPRY2      | 2,43  | 5,40  | 8,98E-03 | ENSG00000136158 |
| LINC00623  | 3,54  | 2,53  | 9,03E-03 | ENSG00000226067 |
| ZNF219     | 2,53  | 6,21  | 9,03E-03 | ENSG00000165804 |
| KANK1      | -2,63 | 5,93  | 9,04E-03 | ENSG00000107104 |
| AL355974.3 | 6,83  | 0,31  | 9,05E-03 | ENSG00000276269 |
| TTN-AS1    | -2,53 | 6,19  | 9,05E-03 | ENSG00000237298 |
| GAS2L2     | -5,21 | 4,26  | 9,09E-03 | ENSG00000270765 |
| CARMN      | 2,81  | 5,21  | 9,12E-03 | ENSG00000249669 |
| UBE2U      | -6,74 | 3,21  | 9,14E-03 | ENSG00000177414 |
| ARSE       | 4,20  | 2,00  | 9,21E-03 | ENSG00000157399 |
| COL8A2     | -2,43 | 5,93  | 9,21E-03 | ENSG00000171812 |
| MS4A2      | -6,42 | 0,06  | 9,24E-03 | ENSG00000149534 |
| NPY1R      | -4,53 | 6,38  | 9,26E-03 | ENSG00000164128 |
| CCL3       | 3,03  | 4,66  | 9,29E-03 | ENSG00000277632 |
| PLEKHH1    | 2,54  | 5,03  | 9,33E-03 | ENSG00000054690 |
| MTND4P12   | 4,34  | 3,59  | 9,36E-03 | ENSG00000247627 |
| TAS2R64P   | -6,79 | 0,35  | 9,37E-03 | ENSG00000256274 |
| DIO3       | 2,95  | 3,68  | 9,38E-03 | ENSG00000197406 |
| AC006504.1 | -3,78 | 2,00  | 9,43E-03 | ENSG00000261770 |
| AC008738.5 | 4,83  | 0,60  | 9,44E-03 | ENSG00000267727 |
| PIFO       | 3,40  | 2,72  | 9,45E-03 | ENSG00000173947 |
| RTP4       | 3,36  | 3,01  | 9,47E-03 | ENSG00000136514 |
| TUBB2A     | 2,52  | 6,32  | 9,50E-03 | ENSG00000137267 |
| BAGE2      | -6,84 | 0,39  | 9,51E-03 | ENSG00000187172 |
| MED28P7    | -6,84 | 0,39  | 9,52E-03 | ENSG00000236542 |

|            |       |       |          |                 |
|------------|-------|-------|----------|-----------------|
| CLMAT3     | 2,54  | 6,38  | 9,53E-03 | ENSG00000249035 |
| SCN3A      | -5,32 | 5,28  | 9,54E-03 | ENSG00000153253 |
| LINC02268  | -6,45 | 0,08  | 9,57E-03 | ENSG00000248174 |
| NR4A3      | 3,42  | 4,20  | 9,62E-03 | ENSG00000119508 |
| ANKEF1     | -4,32 | 2,34  | 9,64E-03 | ENSG00000132623 |
| CERCAM     | -2,48 | 8,37  | 9,68E-03 | ENSG00000167123 |
| LINC00869  | 3,64  | 2,81  | 9,69E-03 | ENSG00000277147 |
| RARRES1    | 3,18  | 4,14  | 9,76E-03 | ENSG00000118849 |
| AATK       | 2,73  | 5,23  | 9,77E-03 | ENSG00000181409 |
| CHL1-AS2   | 6,80  | 0,29  | 9,80E-03 | ENSG00000224318 |
| AC004080.2 | -5,01 | 1,37  | 9,87E-03 | ENSG00000253508 |
| AP003064.1 | 3,44  | 1,80  | 9,87E-03 | ENSG00000255126 |
| UBE2Q2P2   | -3,82 | 1,36  | 9,88E-03 | ENSG00000259429 |
| FAM218A    | 3,98  | 1,12  | 9,89E-03 | ENSG00000250486 |
| AC239868.1 | -2,88 | 4,09  | 9,91E-03 | ENSG00000261716 |
| PNMA2      | 3,27  | 2,32  | 9,91E-03 | ENSG00000240694 |
| DBNDD1     | 3,26  | 2,73  | 9,94E-03 | ENSG00000003249 |
| DEPP1      | 2,45  | 7,49  | 1,01E-02 | ENSG00000165507 |
| SFXN4      | -2,38 | 5,22  | 1,01E-02 | ENSG00000183605 |
| GBP1P1     | 3,43  | 1,80  | 1,01E-02 | ENSG00000225492 |
| OR2L13     | -4,97 | 1,33  | 1,02E-02 | ENSG00000196071 |
| AL589935.1 | 3,26  | 2,71  | 1,02E-02 | ENSG00000232295 |
| HERC2P9    | -2,39 | 6,99  | 1,02E-02 | ENSG00000206149 |
| AL627309.6 | -4,04 | 4,49  | 1,02E-02 | ENSG00000268903 |
| AC022509.1 | 3,54  | 2,03  | 1,02E-02 | ENSG00000255750 |
| CAMK2A     | 3,92  | 3,05  | 1,03E-02 | ENSG00000070808 |
| DPP10      | -5,35 | 4,63  | 1,03E-02 | ENSG00000175497 |
| COL6A6     | -4,93 | 3,15  | 1,03E-02 | ENSG00000206384 |
| GABRA3     | -5,56 | 1,17  | 1,03E-02 | ENSG00000011677 |
| EYA1       | -5,59 | 2,55  | 1,03E-02 | ENSG00000104313 |
| SLK        | -2,84 | 8,06  | 1,03E-02 | ENSG00000065613 |
| BEST1      | 2,35  | 10,47 | 1,03E-02 | ENSG00000167995 |
| AC098613.1 | 4,81  | 0,58  | 1,03E-02 | ENSG00000223552 |
| AP003774.1 | 4,81  | 0,58  | 1,03E-02 | ENSG00000181908 |
| DNM3OS     | -2,48 | 5,67  | 1,04E-02 | ENSG00000230630 |
| AQP5       | 4,22  | 1,89  | 1,04E-02 | ENSG00000161798 |
| AC004492.1 | -5,07 | 0,77  | 1,04E-02 | ENSG00000272072 |
| ZDHHC11    | -3,19 | 3,28  | 1,04E-02 | ENSG00000188818 |
| C1QTNF2    | -3,88 | 5,06  | 1,05E-02 | ENSG00000145861 |
| LINC01833  | -6,60 | 3,09  | 1,05E-02 | ENSG00000259439 |
| TTYH1      | 4,05  | 4,01  | 1,05E-02 | ENSG00000167614 |
| LINC01268  | 4,01  | 2,60  | 1,05E-02 | ENSG00000227502 |
| GIMAP7     | 2,83  | 4,26  | 1,05E-02 | ENSG00000179144 |
| NEXMIF     | -5,00 | 1,95  | 1,05E-02 | ENSG00000050030 |
| SLC5A9     | 3,49  | 4,90  | 1,05E-02 | ENSG00000117834 |
| AL157904.1 | -5,43 | 2,14  | 1,05E-02 | ENSG00000272715 |
| AC009041.1 | 4,85  | 0,63  | 1,05E-02 | ENSG00000260496 |
| SLC6A3     | 4,89  | 2,79  | 1,05E-02 | ENSG00000142319 |
| SOX11      | -3,67 | 5,22  | 1,05E-02 | ENSG00000176887 |
| FSIP1      | 2,68  | 4,54  | 1,05E-02 | ENSG00000150667 |
| SVOP       | 6,74  | 0,23  | 1,06E-02 | ENSG00000166111 |
| CARNS1     | 2,77  | 4,62  | 1,06E-02 | ENSG00000172508 |
| AC055876.2 | -5,19 | 0,87  | 1,07E-02 | ENSG00000254398 |
| TP63       | 4,05  | 1,86  | 1,07E-02 | ENSG00000073282 |
| ALOXE3     | -5,69 | 3,58  | 1,08E-02 | ENSG00000179148 |
| HTRA3      | 2,59  | 6,38  | 1,08E-02 | ENSG00000170801 |
| EPHA8      | -4,85 | 0,60  | 1,08E-02 | ENSG00000070886 |
| CEBPA      | 3,29  | 4,11  | 1,09E-02 | ENSG00000245848 |
| DOK5       | 3,23  | 3,01  | 1,09E-02 | ENSG00000101134 |
| IGHG4      | -5,36 | 8,04  | 1,10E-02 | ENSG00000211892 |
| CRTAM      | 3,75  | 1,44  | 1,10E-02 | ENSG00000109943 |
| ALCAM      | -2,53 | 6,98  | 1,11E-02 | ENSG00000170017 |
| GBX1       | -6,09 | 2,53  | 1,11E-02 | ENSG00000164900 |
| STK10      | 2,50  | 6,77  | 1,11E-02 | ENSG00000072786 |



|            |       |      |          |                 |
|------------|-------|------|----------|-----------------|
| GOLGA6L10  | -3,31 | 2,64 | 1,11E-02 | ENSG00000278662 |
| CCL4       | 3,19  | 3,65 | 1,11E-02 | ENSG00000275302 |
| USP32P3    | -3,17 | 4,47 | 1,11E-02 | ENSG00000189423 |
| AC000032.1 | 3,88  | 2,51 | 1,11E-02 | ENSG00000260246 |
| AC005481.1 | -6,99 | 0,51 | 1,11E-02 | ENSG00000222012 |
| SLC25A24   | 2,74  | 4,05 | 1,11E-02 | ENSG00000085491 |
| RASL12     | 2,47  | 4,83 | 1,11E-02 | ENSG00000103710 |
| AL355922.2 | 6,64  | 0,15 | 1,12E-02 | ENSG00000258599 |
| C10orf67   | 4,95  | 0,74 | 1,12E-02 | ENSG00000179133 |
| RINT1      | -2,35 | 6,47 | 1,12E-02 | ENSG00000135249 |
| HLA-DRB1   | 2,40  | 7,83 | 1,12E-02 | ENSG00000196126 |
| MILR1      | 3,18  | 2,45 | 1,12E-02 | ENSG00000271605 |
| SYT14      | 4,72  | 1,33 | 1,12E-02 | ENSG00000143469 |
| LILRA2     | 4,03  | 2,32 | 1,12E-02 | ENSG00000239998 |
| AC003973.3 | -3,55 | 4,01 | 1,12E-02 | ENSG00000279377 |
| RGS7       | 4,88  | 0,58 | 1,13E-02 | ENSG00000182901 |
| C6orf118   | -5,73 | 2,70 | 1,13E-02 | ENSG00000112539 |
| HMGA1      | 2,54  | 5,52 | 1,13E-02 | ENSG00000137309 |
| CD163L1    | -3,42 | 4,56 | 1,13E-02 | ENSG00000177675 |
| PPP1R14A   | 2,41  | 4,89 | 1,14E-02 | ENSG00000167641 |
| ZNF692     | -2,35 | 7,80 | 1,15E-02 | ENSG00000171163 |
| SLC38A1    | -2,40 | 5,69 | 1,15E-02 | ENSG00000111371 |
| PLA2R1     | -2,26 | 5,63 | 1,15E-02 | ENSG00000153246 |
| FRK        | -3,40 | 4,92 | 1,15E-02 | ENSG00000111816 |
| RHEX       | -6,49 | 0,11 | 1,15E-02 | ENSG00000263961 |
| CDKN2B     | 3,10  | 3,75 | 1,15E-02 | ENSG00000147883 |
| EFCAB10    | -2,25 | 5,70 | 1,15E-02 | ENSG00000185055 |
| ACACA      | -2,55 | 6,63 | 1,15E-02 | ENSG00000278540 |
| FAM110C    | -3,55 | 1,94 | 1,15E-02 | ENSG00000184731 |
| LAYN       | 2,44  | 5,13 | 1,15E-02 | ENSG00000204381 |
| AC016825.1 | 3,28  | 4,23 | 1,16E-02 | ENSG00000232767 |
| TFPI2      | 4,19  | 3,06 | 1,16E-02 | ENSG00000105825 |
| SCARF2     | -2,45 | 6,52 | 1,16E-02 | ENSG00000244486 |
| SIGLEC10   | 3,28  | 3,74 | 1,17E-02 | ENSG00000142512 |
| INHBA-AS1  | -5,01 | 0,71 | 1,18E-02 | ENSG00000224116 |
| APLN       | 2,98  | 5,07 | 1,18E-02 | ENSG00000134817 |
| AP005131.2 | -6,58 | 0,17 | 1,18E-02 | ENSG00000267366 |
| NID1       | 2,77  | 7,83 | 1,18E-02 | ENSG00000116962 |
| POTEKP     | -6,91 | 0,44 | 1,19E-02 | ENSG00000204434 |
| HSPA12A    | 2,56  | 6,82 | 1,19E-02 | ENSG00000165868 |
| INPP5E     | -2,25 | 6,90 | 1,19E-02 | ENSG00000148384 |
| SIGLEC8    | 3,79  | 2,55 | 1,19E-02 | ENSG00000105366 |
| SCX        | -2,60 | 4,67 | 1,19E-02 | ENSG00000260428 |
| SNORC      | 4,00  | 4,58 | 1,19E-02 | ENSG00000182600 |
| SLPI       | -6,30 | 8,30 | 1,19E-02 | ENSG00000124107 |
| NMB        | 2,85  | 4,27 | 1,20E-02 | ENSG00000197696 |
| AC006305.1 | -3,91 | 2,65 | 1,20E-02 | ENSG00000206129 |
| C7orf57    | 4,54  | 1,11 | 1,21E-02 | ENSG00000164746 |
| SPAG4      | -3,06 | 3,02 | 1,21E-02 | ENSG00000061656 |
| AL513217.1 | 2,80  | 4,35 | 1,21E-02 | ENSG00000223774 |
| SPAG6      | -3,72 | 2,26 | 1,21E-02 | ENSG00000077327 |
| DDAH1      | 2,41  | 4,90 | 1,22E-02 | ENSG00000153904 |
| AC100793.4 | -4,82 | 2,79 | 1,22E-02 | ENSG00000273650 |
| GPR37      | -4,27 | 5,77 | 1,22E-02 | ENSG00000170775 |
| AL807752.3 | 4,06  | 1,08 | 1,22E-02 | ENSG00000231864 |
| SGPP2      | -4,23 | 2,07 | 1,22E-02 | ENSG00000163082 |
| AL049552.1 | -3,87 | 1,40 | 1,22E-02 | ENSG00000234084 |
| AL031282.1 | -2,99 | 3,44 | 1,22E-02 | ENSG00000227775 |
| LYPD6      | -3,73 | 3,87 | 1,22E-02 | ENSG00000187123 |
| TCAF1      | -3,10 | 6,66 | 1,22E-02 | ENSG00000198420 |
| EBLN1      | -6,42 | 0,06 | 1,23E-02 | ENSG00000223601 |
| GPRIN2     | -6,42 | 0,06 | 1,23E-02 | ENSG00000204175 |
| CNTN3      | -3,82 | 2,75 | 1,23E-02 | ENSG00000113805 |
| ACY3       | 5,16  | 0,95 | 1,23E-02 | ENSG00000132744 |

|             |       |       |          |                  |
|-------------|-------|-------|----------|------------------|
| AC003991.1  | 3,25  | 3,37  | 1,23E-02 | ENSG00000228113  |
| PEG10       | 3,45  | 5,37  | 1,23E-02 | ENSG00000242265  |
| GCNT4       | -3,78 | 4,35  | 1,24E-02 | ENSG00000176928  |
| ATL1        | 2,63  | 4,84  | 1,25E-02 | ENSG00000198513  |
| FGFBP3      | 3,27  | 2,94  | 1,26E-02 | ENSG00000174721  |
| RPL10P9     | 3,41  | 1,75  | 1,26E-02 | ENSG00000233913  |
| PTGS2       | 3,09  | 2,89  | 1,26E-02 | ENSG00000073756  |
| C2CD4B      | 4,57  | 1,06  | 1,27E-02 | ENSG00000205502  |
| EFNB1       | 2,40  | 5,05  | 1,27E-02 | ENSG00000090776  |
| MYOZ1       | 3,97  | 1,67  | 1,27E-02 | ENSG00000177791  |
| LRRC10B     | 3,64  | 1,15  | 1,27E-02 | ENSG00000204950  |
| RNF165      | 4,08  | 2,86  | 1,27E-02 | ENSG00000141622  |
| AP000697.1  | -6,30 | -0,02 | 1,28E-02 | ENSG00000224269  |
| PPM1H       | -3,20 | 4,90  | 1,28E-02 | ENSG00000111110  |
| ANKRD20A17P | -4,76 | 1,16  | 1,29E-02 | ENSG00000251056  |
| LINC02323   | 4,77  | 0,50  | 1,29E-02 | ENSG00000259230  |
| KMO         | 3,15  | 4,07  | 1,30E-02 | ENSG00000117009  |
| CDSN        | -4,15 | 1,79  | 1,30E-02 | ENSG00000204539  |
| SRP68P3     | -3,78 | 1,82  | 1,30E-02 | ENSG00000237911  |
| SLC6A6      | 2,57  | 6,26  | 1,30E-02 | ENSG00000131389  |
| BST2        | 2,31  | 5,33  | 1,30E-02 | ENSG00000130303  |
| ZEB2        | 2,29  | 7,01  | 1,30E-02 | ENSG00000169554  |
| SEPT5       | -3,75 | 1,30  | 1,30E-02 | ENSG00000184702  |
| DCN         | 2,26  | 8,78  | 1,30E-02 | ENSG00000011465  |
| MAPT        | -3,34 | 5,27  | 1,31E-02 | ENSG00000186868  |
| VASH1       | 2,38  | 6,22  | 1,31E-02 | ENSG00000071246  |
| IGFL4       | 3,47  | 1,71  | 1,32E-02 | ENSG00000204869  |
| GIMAP8      | 2,59  | 4,67  | 1,32E-02 | ENSG00000171115  |
| MKRN3       | -5,57 | 2,90  | 1,32E-02 | ENSG00000179455  |
| MROH7       | -3,88 | 2,40  | 1,32E-02 | ENSG00000184313  |
| AC015909.3  | 7,05  | 0,23  | 1,33E-02 | ENSG00000261959  |
| WT1         | 7,05  | 0,23  | 1,33E-02 | ENSG00000184937  |
| FTH1P16     | 4,72  | 0,41  | 1,33E-02 | ENSG00000227376  |
| IGFBP5      | 2,37  | 8,55  | 1,33E-02 | ENSG00000115461  |
| AL691432.1  | -4,09 | 1,04  | 1,33E-02 | ENSG00000269737  |
| AL138781.1  | 4,14  | 2,94  | 1,33E-02 | ENSG00000260193  |
| SLC35F2     | -3,03 | 5,12  | 1,34E-02 | ENSG00000110660  |
| NEK6        | 2,40  | 6,43  | 1,34E-02 | ENSG00000119408  |
| MSC         | 2,92  | 3,19  | 1,34E-02 | ENSG00000178860  |
| AC148477.1  | 6,53  | 0,07  | 1,34E-02 | ENSG00000255916  |
| BPIFA2      | 3,55  | 3,42  | 1,34E-02 | ENSG00000131050  |
| RUSC1       | -2,18 | 7,25  | 1,34E-02 | ENSG00000160753  |
| LZTS1       | 2,47  | 5,55  | 1,34E-02 | ENSG000000061337 |
| BVES-AS1    | 3,95  | 1,70  | 1,35E-02 | ENSG00000203808  |
| DNAH5       | -4,36 | 4,02  | 1,35E-02 | ENSG00000039139  |
| IRX1        | 5,42  | 0,95  | 1,35E-02 | ENSG00000170549  |
| ITGB2       | 2,31  | 5,60  | 1,35E-02 | ENSG00000160255  |
| SYT16       | -6,04 | 2,44  | 1,36E-02 | ENSG00000139973  |
| AP001099.1  | -4,14 | 1,08  | 1,36E-02 | ENSG00000265728  |
| MPIG6B      | -4,75 | 3,24  | 1,36E-02 | ENSG00000204420  |
| IGF2BP2     | -2,96 | 4,68  | 1,36E-02 | ENSG00000073792  |
| AC079298.1  | -5,06 | 0,76  | 1,36E-02 | ENSG00000278981  |
| FUT1        | 3,35  | 3,86  | 1,37E-02 | ENSG00000174951  |
| MEIS3       | 2,64  | 5,11  | 1,37E-02 | ENSG00000105419  |
| ZNF273      | -2,35 | 5,17  | 1,37E-02 | ENSG00000198039  |
| EML6        | -3,46 | 4,98  | 1,37E-02 | ENSG00000214595  |
| PMP22       | 2,42  | 8,24  | 1,37E-02 | ENSG00000109099  |
| AC007637.1  | -6,35 | 0,00  | 1,38E-02 | ENSG00000256139  |
| SDS         | 3,60  | 1,14  | 1,38E-02 | ENSG00000135094  |
| IGLV2-14    | 4,33  | 1,54  | 1,38E-02 | ENSG00000211666  |
| AL031733.2  | 3,69  | 0,81  | 1,38E-02 | ENSG00000241666  |
| AC026785.2  | 4,49  | 0,92  | 1,38E-02 | ENSG00000248223  |
| POF1B       | -4,53 | 2,38  | 1,38E-02 | ENSG00000124429  |
| LINC00561   | -6,82 | 0,37  | 1,38E-02 | ENSG00000261206  |

|            |       |       |          |                 |
|------------|-------|-------|----------|-----------------|
| KLK2       | -6,31 | -0,01 | 1,39E-02 | ENSG00000167751 |
| GIMAP6     | 2,59  | 4,46  | 1,39E-02 | ENSG00000133561 |
| HAS2       | 2,83  | 3,42  | 1,39E-02 | ENSG00000170961 |
| LINGO1     | 2,68  | 4,43  | 1,39E-02 | ENSG00000169783 |
| MRC2       | -2,46 | 7,77  | 1,39E-02 | ENSG00000011028 |
| AL365273.1 | -2,83 | 3,77  | 1,39E-02 | ENSG00000240527 |
| AC011239.2 | -4,44 | 3,68  | 1,39E-02 | ENSG00000279526 |
| FGF7       | 2,98  | 4,64  | 1,40E-02 | ENSG00000140285 |
| NPM2       | 3,71  | 1,69  | 1,40E-02 | ENSG00000158806 |
| AC018467.1 | 6,21  | -0,22 | 1,40E-02 | ENSG00000232451 |
| MOG        | 4,17  | 0,73  | 1,40E-02 | ENSG00000204655 |
| LILRA1     | 3,67  | 1,96  | 1,41E-02 | ENSG00000104974 |
| GFPT2      | 2,45  | 6,07  | 1,41E-02 | ENSG00000131459 |
| FOLR1      | 6,28  | -0,19 | 1,41E-02 | ENSG00000110195 |
| ALDH3B1    | 2,60  | 4,97  | 1,41E-02 | ENSG00000006534 |
| SLC30A3    | 3,89  | 2,36  | 1,42E-02 | ENSG00000115194 |
| BRDT       | -4,41 | 3,14  | 1,42E-02 | ENSG00000137948 |
| CLEC7A     | 3,30  | 4,65  | 1,42E-02 | ENSG00000172243 |
| EPHB6      | -3,29 | 6,30  | 1,42E-02 | ENSG00000106123 |
| RAP1A      | 2,17  | 6,60  | 1,42E-02 | ENSG00000116473 |
| AC026316.4 | 6,26  | -0,18 | 1,42E-02 | ENSG00000285051 |
| FTH1P2     | 6,26  | -0,18 | 1,43E-02 | ENSG00000234975 |
| PLCH1      | -4,47 | 4,58  | 1,43E-02 | ENSG00000114805 |
| GPR88      | -5,47 | 3,56  | 1,43E-02 | ENSG00000181656 |
| AFDN-DT    | -3,55 | 1,63  | 1,43E-02 | ENSG00000198221 |
| GATA3-AS1  | -6,19 | -0,10 | 1,43E-02 | ENSG00000197308 |
| CRABP2     | -2,90 | 8,33  | 1,43E-02 | ENSG00000143320 |
| EPHX4      | 3,23  | 4,15  | 1,43E-02 | ENSG00000172031 |
| BCL2       | 2,72  | 3,94  | 1,44E-02 | ENSG00000171791 |
| VIM-AS1    | 2,48  | 8,44  | 1,44E-02 | ENSG00000229124 |
| FSTL3      | 2,51  | 7,63  | 1,44E-02 | ENSG00000070404 |
| SOX18      | 2,77  | 5,07  | 1,44E-02 | ENSG00000203883 |
| RAVER2     | -2,74 | 5,40  | 1,45E-02 | ENSG00000162437 |
| FOXF2      | -3,43 | 4,95  | 1,45E-02 | ENSG00000137273 |
| CFAP100    | -3,93 | 0,51  | 1,45E-02 | ENSG00000163885 |
| SF3B4      | -2,35 | 7,27  | 1,45E-02 | ENSG00000143368 |
| CYSTM1     | 2,17  | 5,40  | 1,45E-02 | ENSG00000120306 |
| BNC1       | -4,16 | 4,76  | 1,46E-02 | ENSG00000169594 |
| FGF18      | -4,33 | 6,53  | 1,46E-02 | ENSG00000156427 |
| ADGRV1     | -3,81 | 2,17  | 1,46E-02 | ENSG00000164199 |
| LINC02468  | -6,72 | 0,30  | 1,47E-02 | ENSG00000256499 |
| LINC00517  | 6,59  | -0,08 | 1,48E-02 | ENSG00000259091 |
| AP3B2      | 4,31  | 1,84  | 1,48E-02 | ENSG00000103723 |
| PLS3-AS1   | -3,76 | 1,66  | 1,48E-02 | ENSG00000271826 |
| BARX1-DT   | -6,52 | 0,14  | 1,48E-02 | ENSG00000235601 |
| SLC25A4    | 2,45  | 6,17  | 1,49E-02 | ENSG00000151729 |
| AC108474.1 | -3,68 | 3,44  | 1,49E-02 | ENSG00000250971 |
| AL034397.3 | 3,48  | 2,43  | 1,49E-02 | ENSG00000274536 |
| AC025271.4 | -6,26 | -0,06 | 1,50E-02 | ENSG00000276772 |
| CDAN1      | -2,51 | 6,18  | 1,50E-02 | ENSG00000140326 |
| SBSPON     | 2,44  | 5,37  | 1,51E-02 | ENSG00000164764 |
| ATP10A     | -3,27 | 6,78  | 1,51E-02 | ENSG00000206190 |
| PDLIM3     | 2,17  | 6,49  | 1,51E-02 | ENSG00000154553 |
| AC103564.3 | -5,51 | 2,20  | 1,52E-02 | ENSG00000274353 |
| TBX18      | -2,76 | 6,42  | 1,52E-02 | ENSG00000112837 |
| SFTPD-AS1  | -4,03 | 1,69  | 1,52E-02 | ENSG00000273372 |
| MNDA       | 2,87  | 3,18  | 1,52E-02 | ENSG00000163563 |
| RASGRP2    | 2,41  | 4,66  | 1,52E-02 | ENSG00000068831 |
| AL049557.2 | 3,27  | 1,48  | 1,52E-02 | ENSG00000284830 |
| CSRP2      | -3,08 | 6,59  | 1,53E-02 | ENSG00000175183 |
| IL13RA2    | -4,45 | 4,19  | 1,53E-02 | ENSG00000123496 |
| NOMO1      | -2,27 | 6,40  | 1,53E-02 | ENSG00000103512 |
| TMEM132E   | 3,78  | 2,74  | 1,53E-02 | ENSG00000181291 |
| FLVCR2     | 3,12  | 3,79  | 1,53E-02 | ENSG00000119686 |

|              |       |       |          |                 |
|--------------|-------|-------|----------|-----------------|
| SAMD12       | -4,02 | 5,26  | 1,53E-02 | ENSG00000177570 |
| SLC4A2       | -2,16 | 7,72  | 1,54E-02 | ENSG00000164889 |
| SORBS1       | 2,67  | 7,82  | 1,54E-02 | ENSG00000095637 |
| LINC00923    | -4,37 | 4,08  | 1,54E-02 | ENSG00000251209 |
| LIMA1        | 2,19  | 7,60  | 1,54E-02 | ENSG00000050405 |
| AL451064.2   | -5,49 | 1,09  | 1,55E-02 | ENSG00000279659 |
| CD180        | 3,54  | 1,77  | 1,55E-02 | ENSG00000134061 |
| FSIP2        | -3,40 | 3,58  | 1,56E-02 | ENSG00000188738 |
| VIM          | 2,21  | 10,84 | 1,56E-02 | ENSG00000026025 |
| TNXB         | -3,40 | 7,70  | 1,57E-02 | ENSG00000168477 |
| MMP25-AS1    | -2,47 | 4,89  | 1,57E-02 | ENSG00000261971 |
| FLNC         | 2,54  | 7,52  | 1,57E-02 | ENSG00000128591 |
| GBAP1        | -2,61 | 4,05  | 1,57E-02 | ENSG00000160766 |
| PRCD         | 2,64  | 4,41  | 1,58E-02 | ENSG00000214140 |
| RF02179      | -4,66 | 0,45  | 1,58E-02 | ENSG00000275359 |
| COL6A5       | -6,45 | 0,08  | 1,59E-02 | ENSG00000172752 |
| RNF112       | -3,52 | 3,80  | 1,59E-02 | ENSG00000128482 |
| SLC16A10     | -3,91 | 0,50  | 1,59E-02 | ENSG00000112394 |
| AL596223.2   | 6,10  | -0,30 | 1,59E-02 | ENSG00000231748 |
| PKD1P6       | -2,82 | 5,10  | 1,60E-02 | ENSG00000250251 |
| ITGA10       | -4,02 | 9,16  | 1,60E-02 | ENSG00000143127 |
| ZBTB20-AS1   | -6,61 | 0,19  | 1,60E-02 | ENSG00000241560 |
| AFAP1L2      | 2,53  | 7,25  | 1,60E-02 | ENSG00000169129 |
| AC105046.1   | 3,63  | 1,18  | 1,61E-02 | ENSG00000261026 |
| AC116351.2   | -6,46 | 0,10  | 1,61E-02 | ENSG00000272347 |
| AC148477.7   | 6,33  | -0,09 | 1,61E-02 | ENSG00000279113 |
| APOBEC3B-AS1 | 3,82  | 0,87  | 1,61E-02 | ENSG00000249310 |
| PHYHIP       | 2,86  | 3,68  | 1,61E-02 | ENSG00000168490 |
| PTGES3L      | 4,32  | 0,96  | 1,62E-02 | ENSG00000267060 |
| SLC12A8      | 3,01  | 5,31  | 1,62E-02 | ENSG00000221955 |
| BMPR1B       | -2,34 | 4,79  | 1,62E-02 | ENSG00000138696 |
| CEP83        | -2,17 | 5,53  | 1,62E-02 | ENSG00000173588 |
| CLEC12A      | 3,50  | 2,29  | 1,63E-02 | ENSG00000172322 |
| MAMLD1       | 2,92  | 5,15  | 1,63E-02 | ENSG00000013619 |
| MAP7         | -2,86 | 3,98  | 1,63E-02 | ENSG00000135525 |
| AC022784.1   | -3,79 | 2,33  | 1,63E-02 | ENSG00000248538 |
| AC099489.1   | -2,57 | 4,24  | 1,64E-02 | ENSG00000188897 |
| PTPRC        | 2,37  | 4,77  | 1,64E-02 | ENSG00000081237 |
| ADRB1        | -4,09 | 2,28  | 1,64E-02 | ENSG00000043591 |
| AC004233.3   | 6,37  | -0,06 | 1,64E-02 | ENSG00000272079 |
| LINC01705    | 6,37  | -0,06 | 1,64E-02 | ENSG00000232679 |
| TMC7         | 2,77  | 3,37  | 1,65E-02 | ENSG00000170537 |
| PCP4         | -4,67 | 2,56  | 1,65E-02 | ENSG00000183036 |
| TCEAL8       | 2,20  | 6,10  | 1,65E-02 | ENSG00000180964 |
| AC148477.2   | -4,42 | 3,85  | 1,65E-02 | ENSG00000256542 |
| AL133415.1   | 2,45  | 8,78  | 1,65E-02 | ENSG00000234961 |
| PPP1R15A     | 2,21  | 6,83  | 1,66E-02 | ENSG00000087074 |
| TTYH3        | -2,22 | 7,43  | 1,67E-02 | ENSG00000136295 |
| HTR7         | 4,74  | 0,49  | 1,67E-02 | ENSG00000148680 |
| IRS2         | 2,94  | 5,96  | 1,67E-02 | ENSG00000185950 |
| RBM38        | 2,50  | 5,14  | 1,67E-02 | ENSG00000132819 |
| BMS1P10      | -4,46 | 3,20  | 1,67E-02 | ENSG00000237238 |
| FTH1P11      | 3,61  | 1,09  | 1,67E-02 | ENSG00000237264 |
| AC021088.1   | -3,78 | 1,31  | 1,68E-02 | ENSG00000250619 |
| TNFAIP8L1    | 2,28  | 4,89  | 1,68E-02 | ENSG00000185361 |
| RABGAP1L     | -2,48 | 7,19  | 1,68E-02 | ENSG00000152061 |
| DSP          | -4,05 | 5,11  | 1,68E-02 | ENSG00000096696 |
| CADPS2       | -2,37 | 6,09  | 1,68E-02 | ENSG00000081803 |
| WDPCP        | -2,61 | 4,47  | 1,71E-02 | ENSG00000143951 |
| TNFSF14      | 3,49  | 1,34  | 1,71E-02 | ENSG00000125735 |
| PRDM16       | -3,06 | 5,42  | 1,71E-02 | ENSG00000142611 |
| CHST11       | 2,39  | 5,52  | 1,71E-02 | ENSG00000171310 |
| BCL11A       | 3,64  | 1,40  | 1,71E-02 | ENSG00000119866 |
| SELPLG       | 2,54  | 4,64  | 1,72E-02 | ENSG00000110876 |

|             |       |       |          |                 |
|-------------|-------|-------|----------|-----------------|
| ATF5        | 2,31  | 4,88  | 1,72E-02 | ENSG00000169136 |
| PTAFR       | 2,91  | 3,30  | 1,73E-02 | ENSG00000169403 |
| CAV1        | 2,23  | 8,19  | 1,73E-02 | ENSG00000105974 |
| AOC3        | 2,15  | 5,71  | 1,73E-02 | ENSG00000131471 |
| AC009779.3  | 3,56  | 2,00  | 1,73E-02 | ENSG00000258311 |
| FENDRR      | -4,03 | 3,80  | 1,74E-02 | ENSG00000268388 |
| TMEM26      | -3,41 | 3,77  | 1,75E-02 | ENSG00000196932 |
| SMC2-AS1    | -4,41 | 2,46  | 1,75E-02 | ENSG00000270332 |
| GRIA3       | -3,24 | 3,17  | 1,76E-02 | ENSG00000125675 |
| VWA7        | -3,82 | 1,72  | 1,76E-02 | ENSG00000204396 |
| CNKSR2      | -3,53 | 5,91  | 1,76E-02 | ENSG00000149970 |
| ERG         | -2,58 | 7,08  | 1,76E-02 | ENSG00000157554 |
| HAS2-AS1    | 3,82  | 1,18  | 1,76E-02 | ENSG00000248690 |
| MINPP1      | -3,09 | 6,85  | 1,76E-02 | ENSG00000107789 |
| FUT8-AS1    | 3,52  | 1,31  | 1,76E-02 | ENSG00000276116 |
| ADCY9       | -2,68 | 6,51  | 1,76E-02 | ENSG00000162104 |
| PPFIA4      | -3,15 | 5,85  | 1,77E-02 | ENSG00000143847 |
| AC148477.5  | -4,51 | 3,58  | 1,78E-02 | ENSG00000278872 |
| MFSD2A      | 3,22  | 2,95  | 1,78E-02 | ENSG00000168389 |
| AC027288.3  | 4,05  | 0,64  | 1,79E-02 | ENSG00000257894 |
| EVI2B       | 2,80  | 3,88  | 1,80E-02 | ENSG00000185862 |
| KRT18       | -3,65 | 8,85  | 1,80E-02 | ENSG00000111057 |
| DKK3        | -2,39 | 8,17  | 1,81E-02 | ENSG00000050165 |
| ASH2LP3     | -6,51 | 0,13  | 1,81E-02 | ENSG00000225724 |
| ST8SIA2     | -3,62 | 4,61  | 1,81E-02 | ENSG00000140557 |
| MAPK8IP3    | -2,15 | 8,88  | 1,81E-02 | ENSG00000138834 |
| AF111169.3  | 2,76  | 3,83  | 1,81E-02 | ENSG00000259081 |
| LINC02594   | 5,68  | 2,06  | 1,82E-02 | ENSG00000267440 |
| AC129492.1  | -4,70 | 1,50  | 1,82E-02 | ENSG00000214999 |
| GRIA2       | 6,86  | 0,06  | 1,82E-02 | ENSG00000120251 |
| CACNA1H     | 2,47  | 4,97  | 1,82E-02 | ENSG00000196557 |
| NR2F2       | 2,46  | 7,05  | 1,83E-02 | ENSG00000185551 |
| P2RY12      | 3,93  | 1,43  | 1,83E-02 | ENSG00000169313 |
| MGST1       | -3,75 | 4,41  | 1,83E-02 | ENSG00000008394 |
| AC073410.1  | -3,79 | 0,41  | 1,83E-02 | ENSG00000236047 |
| JPH1        | 3,63  | 3,17  | 1,83E-02 | ENSG00000104369 |
| AC145124.1  | 4,80  | 0,64  | 1,84E-02 | ENSG00000255495 |
| RN7SKP23    | -2,82 | 3,05  | 1,84E-02 | ENSG00000280039 |
| IQCA1       | -2,82 | 3,68  | 1,84E-02 | ENSG00000132321 |
| DCDC1       | -5,28 | 2,62  | 1,84E-02 | ENSG00000170959 |
| FTL         | 2,25  | 10,22 | 1,84E-02 | ENSG00000087086 |
| CRHBP       | -3,68 | 4,47  | 1,84E-02 | ENSG00000145708 |
| FBLN7       | -2,58 | 3,74  | 1,85E-02 | ENSG00000144152 |
| SYNPO2      | 2,14  | 6,15  | 1,85E-02 | ENSG00000172403 |
| TRPC1       | -2,07 | 5,62  | 1,86E-02 | ENSG00000144935 |
| LXN         | 2,39  | 4,83  | 1,86E-02 | ENSG00000079257 |
| SELL        | 2,79  | 2,88  | 1,86E-02 | ENSG00000188404 |
| TPM1-AS     | 2,76  | 4,23  | 1,86E-02 | ENSG00000259498 |
| PHF21B      | 3,79  | 2,29  | 1,86E-02 | ENSG00000056487 |
| BMS1P22     | -6,56 | 0,18  | 1,86E-02 | ENSG00000232775 |
| ADORA2B     | 3,39  | 4,12  | 1,87E-02 | ENSG00000170425 |
| LGR6        | 3,54  | 5,02  | 1,87E-02 | ENSG00000133067 |
| FAM102B     | 2,42  | 4,70  | 1,87E-02 | ENSG00000162636 |
| AKAP9       | -2,09 | 7,38  | 1,87E-02 | ENSG00000127914 |
| PAMR1       | -3,81 | 7,47  | 1,87E-02 | ENSG00000149090 |
| LOH12CR2    | 3,25  | 1,68  | 1,87E-02 | ENSG00000205791 |
| SASH3       | 2,91  | 3,08  | 1,87E-02 | ENSG00000122122 |
| KLHL17      | -2,05 | 5,72  | 1,88E-02 | ENSG00000187961 |
| MLXIPL      | 3,46  | 2,78  | 1,89E-02 | ENSG00000009950 |
| LINC01684   | -3,89 | 3,16  | 1,89E-02 | ENSG00000237484 |
| C22orf31    | -3,80 | 0,41  | 1,89E-02 | ENSG00000100249 |
| AC244517.11 | -4,02 | 0,98  | 1,90E-02 | ENSG00000280029 |
| SHF         | 2,54  | 4,55  | 1,90E-02 | ENSG00000138606 |
| AC034238.1  | 3,03  | 2,20  | 1,90E-02 | ENSG00000240535 |

|            |       |       |          |                 |
|------------|-------|-------|----------|-----------------|
| CCDC25     | 2,29  | 6,70  | 1,90E-02 | ENSG00000147419 |
| MAGEA1     | -6,01 | 2,53  | 1,91E-02 | ENSG00000198681 |
| ISL2       | -5,21 | 0,87  | 1,91E-02 | ENSG00000159556 |
| AP005131.6 | -3,83 | 0,83  | 1,92E-02 | ENSG00000267702 |
| DIO2       | 2,35  | 6,68  | 1,92E-02 | ENSG00000211448 |
| PLA2G2A    | 3,35  | 5,64  | 1,92E-02 | ENSG00000188257 |
| MFAP2      | -3,16 | 7,04  | 1,92E-02 | ENSG00000117122 |
| LINC01001  | -3,17 | 2,03  | 1,93E-02 | ENSG00000230724 |
| EIF3L      | 2,37  | 5,97  | 1,93E-02 | ENSG00000100129 |
| AL133325.3 | -3,18 | 3,55  | 1,93E-02 | ENSG00000278041 |
| MPP6       | -2,62 | 4,68  | 1,93E-02 | ENSG00000105926 |
| OCLM       | -6,27 | -0,04 | 1,94E-02 | ENSG00000262180 |
| PPFIA2     | -2,65 | 4,72  | 1,94E-02 | ENSG00000139220 |
| NHSL1      | -2,89 | 6,12  | 1,94E-02 | ENSG00000135540 |
| SH3KBP1    | 2,17  | 6,21  | 1,94E-02 | ENSG00000147010 |
| CLEC4GP1   | -5,95 | -0,27 | 1,94E-02 | ENSG00000268297 |
| PRAM1      | 3,28  | 3,04  | 1,95E-02 | ENSG00000133246 |
| AC018804.1 | -5,95 | -0,27 | 1,95E-02 | ENSG00000227632 |
| DPF3       | 3,30  | 2,44  | 1,95E-02 | ENSG00000205683 |
| CHRNA1     | 3,41  | 1,27  | 1,96E-02 | ENSG00000138435 |
| MAP4       | 2,18  | 8,38  | 1,97E-02 | ENSG00000047849 |
| ADM        | -2,77 | 5,83  | 1,97E-02 | ENSG00000148926 |
| ADRA1B     | -4,53 | 2,88  | 1,98E-02 | ENSG00000170214 |
| OR2M3      | -6,45 | 0,09  | 1,98E-02 | ENSG00000228198 |
| AC084855.1 | -3,10 | 2,27  | 1,98E-02 | ENSG00000254744 |
| NAV2       | -2,36 | 6,09  | 1,99E-02 | ENSG00000166833 |
| BCAT1      | 2,45  | 3,99  | 1,99E-02 | ENSG00000060982 |
| SLC29A1    | -3,01 | 8,19  | 1,99E-02 | ENSG00000112759 |
| AC145423.3 | -3,72 | 0,35  | 1,99E-02 | ENSG00000278112 |
| AC092338.2 | -3,72 | 0,35  | 1,99E-02 | ENSG00000260790 |
| CTHRC1     | 2,20  | 5,76  | 2,00E-02 | ENSG00000164932 |
| TREM1      | 6,14  | -0,24 | 2,00E-02 | ENSG00000124731 |
| NUP62CL    | -4,17 | 2,37  | 2,01E-02 | ENSG00000198088 |
| MAGI2      | -2,75 | 4,88  | 2,01E-02 | ENSG00000187391 |
| MYO3A      | 4,36  | 1,68  | 2,01E-02 | ENSG00000095777 |
| AL512622.1 | -3,53 | 1,79  | 2,01E-02 | ENSG00000235010 |
| AC025259.3 | 2,42  | 8,50  | 2,02E-02 | ENSG00000259884 |
| HILS1      | 4,04  | 1,13  | 2,02E-02 | ENSG00000188662 |
| TBX1       | -3,09 | 5,18  | 2,02E-02 | ENSG00000184058 |
| CLDN23     | -3,43 | 3,37  | 2,03E-02 | ENSG00000253958 |
| CCDC160    | -4,72 | 1,53  | 2,03E-02 | ENSG00000203952 |
| SLC6A1     | 2,53  | 4,08  | 2,03E-02 | ENSG00000157103 |
| AL136164.4 | 3,23  | 2,01  | 2,03E-02 | ENSG00000279312 |
| IGBP1      | 2,06  | 5,56  | 2,03E-02 | ENSG00000089289 |
| RARRES2    | 2,25  | 5,07  | 2,03E-02 | ENSG00000106538 |
| CELF5      | 3,40  | 1,17  | 2,04E-02 | ENSG00000161082 |
| NEB        | -2,50 | 4,04  | 2,04E-02 | ENSG00000183091 |
| AL023284.4 | -3,70 | 0,74  | 2,04E-02 | ENSG00000260418 |
| AC116345.1 | 3,31  | 2,59  | 2,04E-02 | ENSG00000249743 |
| KIAA1841   | -2,18 | 4,94  | 2,05E-02 | ENSG00000162929 |
| AL589880.1 | 6,05  | -0,37 | 2,05E-02 | ENSG00000229939 |
| ALOX12B    | -5,09 | 2,76  | 2,05E-02 | ENSG00000179477 |
| CCDC144A   | -3,53 | 2,32  | 2,05E-02 | ENSG00000170160 |
| DPYSL2     | 2,24  | 7,72  | 2,05E-02 | ENSG00000092964 |
| LINC01597  | -3,84 | 1,53  | 2,06E-02 | ENSG00000205611 |
| IQCA1L     | -6,07 | -0,19 | 2,06E-02 | ENSG00000278685 |
| APOL3      | 2,37  | 5,36  | 2,06E-02 | ENSG00000128284 |
| SCCPDH     | 2,44  | 6,42  | 2,06E-02 | ENSG00000143653 |
| AC010719.1 | -3,21 | 1,36  | 2,07E-02 | ENSG00000270933 |
| LMX1A      | -3,84 | 0,45  | 2,07E-02 | ENSG00000162761 |
| WISP1      | -3,01 | 6,63  | 2,07E-02 | ENSG00000104415 |
| FAM3C      | -2,04 | 6,92  | 2,07E-02 | ENSG00000196937 |
| ITGA3      | 2,53  | 7,10  | 2,08E-02 | ENSG00000005884 |
| GBP4       | 2,36  | 4,33  | 2,08E-02 | ENSG00000162654 |

|            |       |       |          |                 |
|------------|-------|-------|----------|-----------------|
| ANGPTL7    | 3,95  | 2,45  | 2,08E-02 | ENSG00000171819 |
| TFAP2A-AS2 | 3,51  | 2,16  | 2,08E-02 | ENSG00000285278 |
| ALDH1L2    | 2,49  | 4,53  | 2,08E-02 | ENSG00000136010 |
| AC098869.2 | 6,19  | -0,20 | 2,08E-02 | ENSG00000250893 |
| MPPED2     | -3,01 | 4,25  | 2,09E-02 | ENSG00000066382 |
| PRSS35     | -3,35 | 3,56  | 2,09E-02 | ENSG00000146250 |
| AP005131.7 | -3,80 | 0,42  | 2,10E-02 | ENSG00000272746 |
| ATP4B      | -6,10 | -0,17 | 2,10E-02 | ENSG00000186009 |
| CYP26B1    | -2,43 | 4,36  | 2,10E-02 | ENSG00000003137 |
| MYCT1      | 2,77  | 4,42  | 2,10E-02 | ENSG00000120279 |
| SEC14L5    | 3,52  | 1,62  | 2,10E-02 | ENSG00000103184 |
| CD24       | 3,05  | 2,64  | 2,10E-02 | ENSG00000272398 |
| C14orf132  | 2,13  | 5,34  | 2,11E-02 | ENSG00000227051 |
| PI4KAP1    | -2,13 | 5,51  | 2,11E-02 | ENSG00000274602 |
| AC025280.3 | -3,72 | 1,95  | 2,11E-02 | ENSG00000285848 |
| AC093525.6 | 3,86  | 1,26  | 2,11E-02 | ENSG00000261613 |
| TMEM156    | 3,89  | 1,07  | 2,12E-02 | ENSG00000121895 |
| AC139256.1 | -2,57 | 3,91  | 2,12E-02 | ENSG00000260735 |
| AC105052.2 | -3,28 | 1,11  | 2,13E-02 | ENSG00000213385 |
| CCDC184    | 3,33  | 1,10  | 2,13E-02 | ENSG00000177875 |
| MSC-AS1    | 2,74  | 3,09  | 2,13E-02 | ENSG00000235531 |
| SLC9A5     | 2,55  | 5,17  | 2,14E-02 | ENSG00000135740 |
| ITGB5      | -2,03 | 7,96  | 2,14E-02 | ENSG00000082781 |
| B3GALT5    | 4,10  | 2,62  | 2,15E-02 | ENSG00000183778 |
| FRMD5      | 2,43  | 5,08  | 2,16E-02 | ENSG00000171877 |
| MCHR1      | 4,47  | 0,33  | 2,16E-02 | ENSG00000128285 |
| CYBB       | 2,27  | 5,01  | 2,16E-02 | ENSG00000165168 |
| HIST1H2BH  | -5,05 | 2,05  | 2,16E-02 | ENSG00000275713 |
| TTC39A     | -3,22 | 1,67  | 2,16E-02 | ENSG00000085831 |
| HSPB7      | 2,77  | 5,33  | 2,16E-02 | ENSG00000173641 |
| ATP1B1     | -2,08 | 6,31  | 2,18E-02 | ENSG00000143153 |
| SLC1A5     | 2,01  | 5,51  | 2,18E-02 | ENSG00000105281 |
| AL133346.1 | 2,86  | 3,32  | 2,18E-02 | ENSG00000227220 |
| LINC01088  | 2,97  | 2,72  | 2,19E-02 | ENSG00000249307 |
| COBLL1     | -2,38 | 6,37  | 2,19E-02 | ENSG00000082438 |
| PABPC1P4   | 3,33  | 1,92  | 2,19E-02 | ENSG00000255642 |
| ETNK2      | -2,67 | 5,77  | 2,19E-02 | ENSG00000143845 |
| ANXA1      | 2,05  | 8,06  | 2,20E-02 | ENSG00000135046 |
| PCOLCE     | -2,54 | 8,90  | 2,20E-02 | ENSG00000106333 |
| PRKAB2     | 2,26  | 6,20  | 2,21E-02 | ENSG00000131791 |
| MEIOC      | 2,64  | 4,04  | 2,21E-02 | ENSG00000180336 |
| MICE       | -4,42 | 0,27  | 2,21E-02 | ENSG00000273340 |
| YJEFN3     | -2,45 | 4,53  | 2,22E-02 | ENSG00000250067 |
| PCSK5      | -2,44 | 5,46  | 2,23E-02 | ENSG00000099139 |
| AP001189.1 | 2,87  | 2,36  | 2,23E-02 | ENSG00000236304 |
| NDST3      | -3,96 | 2,40  | 2,23E-02 | ENSG00000164100 |
| CD207      | 3,36  | 0,58  | 2,24E-02 | ENSG00000116031 |
| PLPPR5     | 3,86  | 1,44  | 2,24E-02 | ENSG00000117598 |
| AC011558.1 | 2,13  | 5,04  | 2,24E-02 | ENSG00000279753 |
| TGFB2      | -2,72 | 3,78  | 2,24E-02 | ENSG00000092969 |
| AL390729.1 | 4,67  | 0,54  | 2,24E-02 | ENSG00000224167 |
| TAF13      | 2,32  | 4,56  | 2,24E-02 | ENSG00000197780 |
| LINC01563  | 4,33  | 0,20  | 2,25E-02 | ENSG00000236819 |
| CDC20P1    | -4,13 | 1,75  | 2,25E-02 | ENSG00000231007 |
| AL008729.2 | -2,51 | 4,16  | 2,25E-02 | ENSG00000272379 |
| GDPD2      | 4,61  | 1,92  | 2,25E-02 | ENSG00000130055 |
| TMEM158    | 2,76  | 3,33  | 2,25E-02 | ENSG00000249992 |
| ZNF575     | 2,49  | 4,24  | 2,26E-02 | ENSG00000176472 |
| ITGAX      | 2,68  | 5,90  | 2,26E-02 | ENSG00000140678 |
| CBX6       | 2,05  | 6,53  | 2,26E-02 | ENSG00000183741 |
| RPLP0P2    | 2,97  | 4,03  | 2,26E-02 | ENSG00000243742 |
| LINC01310  | 3,13  | 1,53  | 2,27E-02 | ENSG00000205632 |
| LINC01748  | 4,66  | 1,76  | 2,27E-02 | ENSG00000226476 |
| INTS4P1    | -2,80 | 3,36  | 2,27E-02 | ENSG00000164669 |

|            |       |       |          |                 |
|------------|-------|-------|----------|-----------------|
| SCUBE1     | -3,25 | 3,26  | 2,28E-02 | ENSG00000159307 |
| AP001330.5 | 3,64  | 1,51  | 2,28E-02 | ENSG00000271882 |
| AC010973.2 | -2,01 | 6,88  | 2,29E-02 | ENSG00000244151 |
| LINC02551  | -4,01 | 1,22  | 2,29E-02 | ENSG00000254842 |
| AC112721.1 | 4,32  | 0,94  | 2,29E-02 | ENSG00000222022 |
| MRAS       | 2,18  | 7,16  | 2,30E-02 | ENSG00000158186 |
| LIPH       | -4,77 | 2,58  | 2,30E-02 | ENSG00000163898 |
| GPRC5D     | -3,67 | 0,32  | 2,30E-02 | ENSG00000111291 |
| KCNIP1     | 3,78  | 1,89  | 2,30E-02 | ENSG00000182132 |
| KCNQ2      | 4,22  | 2,26  | 2,31E-02 | ENSG00000075043 |
| RORA-AS1   | -2,96 | 4,35  | 2,31E-02 | ENSG00000245534 |
| PKP1       | -3,87 | 4,00  | 2,32E-02 | ENSG00000081277 |
| CFAP47     | -4,50 | 3,75  | 2,32E-02 | ENSG00000165164 |
| AL121985.1 | 2,82  | 2,71  | 2,32E-02 | ENSG00000228863 |
| OR7E38P    | -5,98 | -0,24 | 2,32E-02 | ENSG00000183444 |
| GFRA1      | 3,43  | 8,89  | 2,32E-02 | ENSG00000151892 |
| KIAA0040   | -2,15 | 6,20  | 2,33E-02 | ENSG00000235750 |
| ZNF300     | -2,01 | 5,46  | 2,33E-02 | ENSG00000145908 |
| ERC2       | -3,37 | 0,99  | 2,33E-02 | ENSG00000187672 |
| IL6        | 3,83  | 3,07  | 2,33E-02 | ENSG00000136244 |
| AL445437.1 | -6,25 | -0,05 | 2,34E-02 | ENSG00000279778 |
| AL627309.7 | -5,07 | 1,80  | 2,34E-02 | ENSG00000269981 |
| CHEK2P2    | -6,25 | -0,05 | 2,34E-02 | ENSG00000259156 |
| AC019197.1 | -4,20 | 2,56  | 2,34E-02 | ENSG00000236283 |
| DHCR7      | -2,51 | 3,84  | 2,34E-02 | ENSG00000172893 |
| SLC2A10    | -2,04 | 5,39  | 2,34E-02 | ENSG00000197496 |
| TFEC       | 2,87  | 3,21  | 2,35E-02 | ENSG00000105967 |
| LINP1      | 6,08  | -0,28 | 2,35E-02 | ENSG00000223784 |
| UNC13A     | 3,09  | 2,38  | 2,35E-02 | ENSG00000130477 |
| HGF        | 2,91  | 3,31  | 2,35E-02 | ENSG00000019991 |
| KIT        | -2,38 | 4,99  | 2,35E-02 | ENSG00000157404 |
| PRRG3      | 3,04  | 3,09  | 2,35E-02 | ENSG00000130032 |
| TM6SF2     | -4,61 | 2,74  | 2,36E-02 | ENSG00000213996 |
| AC137056.1 | 3,36  | 2,39  | 2,36E-02 | ENSG00000262995 |
| AC141557.2 | -6,05 | -0,20 | 2,36E-02 | ENSG00000278635 |
| IGBP1-AS2  | 2,57  | 3,45  | 2,37E-02 | ENSG00000220925 |
| MPPED1     | 4,36  | 1,16  | 2,37E-02 | ENSG00000186732 |
| IGFBP7-AS1 | 2,14  | 6,47  | 2,37E-02 | ENSG00000245067 |
| LAPTM5     | 2,15  | 6,67  | 2,38E-02 | ENSG00000162511 |
| AC004918.3 | -3,96 | 0,92  | 2,38E-02 | ENSG00000270157 |
| SMIM5      | 2,98  | 3,23  | 2,38E-02 | ENSG00000204323 |
| DNAH2      | -3,44 | 3,19  | 2,38E-02 | ENSG00000183914 |
| MT1X       | -2,59 | 3,78  | 2,38E-02 | ENSG00000187193 |
| EMB        | -2,90 | 6,58  | 2,38E-02 | ENSG00000170571 |
| TMEM98     | 2,14  | 6,01  | 2,39E-02 | ENSG00000006042 |
| FHL2       | 2,45  | 6,05  | 2,40E-02 | ENSG00000115641 |
| DUSP6      | 2,25  | 7,18  | 2,41E-02 | ENSG00000139318 |
| B3GLCT     | -2,02 | 5,44  | 2,41E-02 | ENSG00000187676 |
| RAET1L     | -4,84 | 0,56  | 2,41E-02 | ENSG00000155918 |
| DAPP1      | 3,12  | 1,90  | 2,41E-02 | ENSG00000070190 |
| CSF2RB     | 2,78  | 3,31  | 2,41E-02 | ENSG00000100368 |
| TCN2       | 2,38  | 4,84  | 2,41E-02 | ENSG00000185339 |
| AC114296.1 | 4,58  | 2,74  | 2,41E-02 | ENSG00000250378 |
| MBOAT1     | -2,15 | 4,87  | 2,42E-02 | ENSG00000172197 |
| PCDH7      | 3,08  | 4,43  | 2,43E-02 | ENSG00000169851 |
| CTSK       | -2,36 | 8,17  | 2,43E-02 | ENSG00000143387 |
| RRN3P3     | -2,38 | 4,56  | 2,43E-02 | ENSG00000257122 |
| ACSBG2     | -3,55 | 2,05  | 2,43E-02 | ENSG00000130377 |
| RCSD1      | 2,30  | 4,25  | 2,44E-02 | ENSG00000198771 |
| LINC01115  | -6,13 | -0,14 | 2,44E-02 | ENSG00000237667 |
| SPDY2      | -6,13 | -0,14 | 2,44E-02 | ENSG00000205238 |
| PARAL1     | -6,32 | 0,00  | 2,45E-02 | ENSG00000243961 |
| RFTN1      | 2,04  | 5,10  | 2,46E-02 | ENSG00000131378 |
| SEMA5B     | -2,91 | 6,30  | 2,46E-02 | ENSG00000082684 |



|            |       |       |          |                 |
|------------|-------|-------|----------|-----------------|
| AC106820.4 | -3,49 | 3,06  | 2,47E-02 | ENSG00000260293 |
| SLAMF9     | -5,75 | 2,29  | 2,47E-02 | ENSG00000162723 |
| AC015909.2 | 4,70  | 1,59  | 2,47E-02 | ENSG00000253730 |
| SLC52A1    | -3,44 | 2,65  | 2,47E-02 | ENSG00000132517 |
| KCND3      | 3,15  | 2,43  | 2,47E-02 | ENSG00000171385 |
| SIX4       | -2,75 | 3,71  | 2,48E-02 | ENSG00000100625 |
| C11orf96   | 2,22  | 5,67  | 2,49E-02 | ENSG00000187479 |
| FGF22      | 3,48  | 0,66  | 2,49E-02 | ENSG00000070388 |
| AC103564.2 | -4,71 | 3,22  | 2,49E-02 | ENSG00000232760 |
| TGFB2-AS1  | -3,57 | 0,25  | 2,50E-02 | ENSG00000232480 |
| RPL13AP7   | -3,57 | 0,25  | 2,50E-02 | ENSG00000213885 |
| HOXC10     | -2,23 | 5,98  | 2,50E-02 | ENSG00000180818 |
| ATXN7L1    | -2,52 | 5,12  | 2,51E-02 | ENSG00000146776 |
| TREM2      | 3,14  | 3,92  | 2,51E-02 | ENSG00000095970 |
| FEV        | 3,89  | 0,54  | 2,52E-02 | ENSG00000163497 |
| PLIN3      | 2,12  | 6,63  | 2,52E-02 | ENSG00000105355 |
| CACNB1     | -2,09 | 5,49  | 2,52E-02 | ENSG00000067191 |
| AC092490.1 | 6,47  | -0,20 | 2,52E-02 | ENSG00000249790 |
| CSAG1      | -5,40 | 3,17  | 2,52E-02 | ENSG00000198930 |
| CMYA5      | 2,42  | 5,81  | 2,52E-02 | ENSG00000164309 |
| COG7       | -1,96 | 6,29  | 2,52E-02 | ENSG00000168434 |
| SCO2       | 4,30  | 0,17  | 2,53E-02 | ENSG00000130489 |
| AC025884.1 | -3,96 | 0,53  | 2,53E-02 | ENSG00000258732 |
| WNK2       | -2,87 | 4,23  | 2,53E-02 | ENSG00000165238 |
| LRRIQ1     | 5,99  | -0,41 | 2,55E-02 | ENSG00000133640 |
| PTPRF      | -2,31 | 7,56  | 2,56E-02 | ENSG00000142949 |
| CABP1      | 2,91  | 2,45  | 2,56E-02 | ENSG00000157782 |
| GSTM3P1    | -3,88 | 0,47  | 2,56E-02 | ENSG00000227693 |
| PTCH1      | 2,40  | 5,88  | 2,56E-02 | ENSG00000185920 |
| GJA3       | -4,61 | 3,37  | 2,57E-02 | ENSG00000121743 |
| SCUBE3     | 2,69  | 4,06  | 2,57E-02 | ENSG00000146197 |
| DNAH12     | 3,33  | 4,32  | 2,57E-02 | ENSG00000174844 |
| COL5A3     | 2,05  | 6,82  | 2,57E-02 | ENSG00000080573 |
| GEM        | 2,06  | 6,48  | 2,58E-02 | ENSG00000164949 |
| TNNC1      | 3,22  | 2,33  | 2,58E-02 | ENSG00000114854 |
| SSC5D      | -2,25 | 5,31  | 2,59E-02 | ENSG00000179954 |
| NPIPP1     | -2,04 | 5,32  | 2,60E-02 | ENSG00000188599 |
| OGFRL1     | 2,14  | 5,37  | 2,60E-02 | ENSG00000119900 |
| DPY19L2    | -2,43 | 6,97  | 2,61E-02 | ENSG00000177990 |
| NKILA      | 2,94  | 2,33  | 2,61E-02 | ENSG00000278709 |
| ZDHHC2     | -2,14 | 5,20  | 2,61E-02 | ENSG00000104219 |
| GNX7       | 2,71  | 3,61  | 2,61E-02 | ENSG00000176533 |
| CALCRL     | 2,19  | 4,97  | 2,61E-02 | ENSG00000064989 |
| AC106786.1 | -4,96 | 1,32  | 2,62E-02 | ENSG00000223652 |
| PGM5P4     | 3,61  | 0,20  | 2,62E-02 | ENSG00000225398 |
| SLC10A4    | -3,74 | 5,22  | 2,62E-02 | ENSG00000145248 |
| CASP1      | 2,50  | 3,83  | 2,63E-02 | ENSG00000137752 |
| ZFPM2      | -2,92 | 5,24  | 2,63E-02 | ENSG00000169946 |
| ITIH6      | -4,83 | 3,38  | 2,63E-02 | ENSG00000102313 |
| DRD1       | -4,22 | 3,40  | 2,63E-02 | ENSG00000184845 |
| FAM157A    | -3,25 | 1,25  | 2,63E-02 | ENSG00000236438 |
| SDCBP2-AS1 | -2,67 | 2,92  | 2,63E-02 | ENSG00000234684 |
| B3GALT1    | -3,64 | 3,52  | 2,64E-02 | ENSG00000172318 |
| AC116407.2 | -3,75 | 3,58  | 2,66E-02 | ENSG00000277511 |
| CADM4      | 2,55  | 5,34  | 2,66E-02 | ENSG00000105767 |
| SLC11A1    | 2,50  | 4,32  | 2,66E-02 | ENSG00000018280 |
| CPSF1P1    | -4,43 | 0,28  | 2,67E-02 | ENSG00000214076 |
| AC073133.2 | -3,65 | 0,30  | 2,67E-02 | ENSG00000233878 |
| GPSM1      | -2,11 | 7,47  | 2,68E-02 | ENSG00000160360 |
| LRP10      | 2,21  | 8,14  | 2,68E-02 | ENSG00000197324 |
| OSGIN2     | 2,61  | 4,08  | 2,68E-02 | ENSG00000164823 |
| CDCA7      | -3,51 | 4,81  | 2,69E-02 | ENSG00000144354 |
| PAQR5      | 3,15  | 2,16  | 2,69E-02 | ENSG00000137819 |
| PCBP3      | 2,99  | 2,85  | 2,69E-02 | ENSG00000183570 |

|            |       |       |          |                 |
|------------|-------|-------|----------|-----------------|
| KLK1       | -4,38 | 4,58  | 2,69E-02 | ENSG00000167748 |
| AGAP2      | 2,28  | 4,78  | 2,69E-02 | ENSG00000135439 |
| CLCNKA     | -3,38 | 1,66  | 2,69E-02 | ENSG00000186510 |
| GOLGA2P10  | -2,45 | 3,76  | 2,69E-02 | ENSG00000255769 |
| FAM41C     | -4,94 | 1,68  | 2,69E-02 | ENSG00000230368 |
| MSRB3      | 2,03  | 7,42  | 2,70E-02 | ENSG00000174099 |
| PLEK2      | 3,20  | 1,03  | 2,70E-02 | ENSG00000100558 |
| STK26      | -3,12 | 5,49  | 2,71E-02 | ENSG00000134602 |
| AC091059.1 | 2,88  | 2,21  | 2,71E-02 | ENSG00000266002 |
| AC108865.2 | -4,86 | 0,59  | 2,71E-02 | ENSG00000272218 |
| DACH1      | -3,40 | 4,17  | 2,72E-02 | ENSG00000276644 |
| LRP5       | -2,02 | 5,46  | 2,72E-02 | ENSG00000162337 |
| PERM1      | -2,67 | 3,09  | 2,72E-02 | ENSG00000187642 |
| TNFRSF8    | 3,25  | 1,94  | 2,73E-02 | ENSG00000120949 |
| ZNF503     | -2,56 | 5,88  | 2,73E-02 | ENSG00000165655 |
| HOXA10     | -2,33 | 4,80  | 2,74E-02 | ENSG00000253293 |
| FCGR2C     | 3,49  | 4,16  | 2,74E-02 | ENSG00000244682 |
| MYBPHL     | 4,22  | 0,11  | 2,74E-02 | ENSG00000221986 |
| LINC01060  | 4,22  | 0,11  | 2,74E-02 | ENSG00000249378 |
| C16orf82   | 4,22  | 0,11  | 2,75E-02 | ENSG00000234186 |
| GPR143     | -3,90 | 2,42  | 2,75E-02 | ENSG00000101850 |
| DDR1       | 2,05  | 6,76  | 2,75E-02 | ENSG00000204580 |
| AL162591.2 | 3,21  | 1,83  | 2,75E-02 | ENSG00000273110 |
| HCG22      | 3,86  | 0,51  | 2,75E-02 | ENSG00000228789 |
| SNHG18     | -2,56 | 4,65  | 2,75E-02 | ENSG00000250786 |
| CACHD1     | -2,21 | 4,93  | 2,76E-02 | ENSG00000158966 |
| SLC5A3     | 2,31  | 6,99  | 2,77E-02 | ENSG00000198743 |
| AC105446.1 | 3,33  | 1,39  | 2,78E-02 | ENSG00000227053 |
| CES5AP1    | 4,55  | 1,86  | 2,78E-02 | ENSG00000215478 |
| SYNDIG1    | -3,04 | 3,64  | 2,78E-02 | ENSG00000101463 |
| AP003396.5 | 1,91  | 5,71  | 2,78E-02 | ENSG00000263873 |
| EDN2       | -3,41 | 0,77  | 2,78E-02 | ENSG00000127129 |
| AC009542.2 | -5,48 | 1,93  | 2,78E-02 | ENSG00000276067 |
| SH3D21     | -2,08 | 6,32  | 2,78E-02 | ENSG00000214193 |
| PECAM1     | 2,08  | 7,77  | 2,79E-02 | ENSG00000261371 |
| FAM155B    | 4,14  | 0,61  | 2,79E-02 | ENSG00000130054 |
| MT-TY      | 2,87  | 5,72  | 2,79E-02 | ENSG00000210144 |
| GGTA1P     | 2,18  | 4,82  | 2,79E-02 | ENSG00000204136 |
| AL592146.1 | -2,88 | 4,85  | 2,80E-02 | ENSG00000261065 |
| GPC6       | -2,23 | 4,58  | 2,80E-02 | ENSG00000183098 |
| IL18R1     | -2,89 | 3,82  | 2,80E-02 | ENSG00000115604 |
| FTH1P7     | 3,23  | 0,76  | 2,80E-02 | ENSG00000232187 |
| AC018638.5 | -1,99 | 5,81  | 2,81E-02 | ENSG00000243679 |
| AC023794.3 | 3,30  | 1,42  | 2,82E-02 | ENSG00000250654 |
| AL359881.2 | -4,28 | 0,16  | 2,82E-02 | ENSG00000270035 |
| MYLK3      | 3,18  | 1,05  | 2,83E-02 | ENSG00000140795 |
| IL6R       | 2,63  | 4,75  | 2,83E-02 | ENSG00000160712 |
| ARHGAP15   | 2,49  | 3,40  | 2,83E-02 | ENSG00000075884 |
| SYTL5      | -4,35 | 1,73  | 2,83E-02 | ENSG00000147041 |
| CDHR3      | -2,72 | 4,64  | 2,84E-02 | ENSG00000128536 |
| ARHGAP6    | -2,23 | 5,64  | 2,84E-02 | ENSG00000047648 |
| PTP4A2P2   | 3,98  | 1,15  | 2,84E-02 | ENSG00000254481 |
| CASC8      | -4,14 | 0,63  | 2,84E-02 | ENSG00000246228 |
| FTLP3      | 2,93  | 2,10  | 2,85E-02 | ENSG00000226608 |
| AC112198.2 | 5,77  | -0,53 | 2,85E-02 | ENSG00000232517 |
| GREB1      | 2,96  | 4,63  | 2,86E-02 | ENSG00000196208 |
| THSD4      | -1,94 | 5,55  | 2,86E-02 | ENSG00000187720 |
| AL035252.3 | 3,45  | 1,88  | 2,86E-02 | ENSG00000277938 |
| WNT10B     | 3,23  | 4,39  | 2,87E-02 | ENSG00000169884 |
| TRAF1      | 2,20  | 7,12  | 2,87E-02 | ENSG00000056558 |
| CYFIP2     | 2,11  | 4,92  | 2,87E-02 | ENSG00000055163 |
| GLIS1      | -3,18 | 2,82  | 2,87E-02 | ENSG00000174332 |
| AC245884.1 | 4,65  | 0,89  | 2,88E-02 | ENSG00000227407 |
| LRRC8B     | 2,73  | 6,86  | 2,88E-02 | ENSG00000197147 |

|            |       |       |          |                 |
|------------|-------|-------|----------|-----------------|
| FOXF1      | -2,56 | 4,49  | 2,89E-02 | ENSG00000103241 |
| AC080038.3 | -2,92 | 3,97  | 2,90E-02 | ENSG00000279713 |
| SOCS3      | 2,12  | 7,30  | 2,90E-02 | ENSG00000184557 |
| AC004080.1 | -5,28 | 1,72  | 2,90E-02 | ENSG00000253308 |
| AC079684.1 | -3,45 | 0,54  | 2,90E-02 | ENSG00000274943 |
| MALAT1     | -2,18 | 10,30 | 2,91E-02 | ENSG00000251562 |
| AC091588.3 | -2,74 | 3,20  | 2,91E-02 | ENSG00000266283 |
| AC092354.2 | -4,12 | 2,30  | 2,91E-02 | ENSG00000272370 |
| DPH3       | 2,06  | 4,82  | 2,92E-02 | ENSG00000154813 |
| RSPO4      | -3,36 | 2,35  | 2,92E-02 | ENSG00000101282 |
| MAN1C1     | 2,14  | 4,75  | 2,92E-02 | ENSG00000117643 |
| AC241377.3 | 3,96  | 0,68  | 2,94E-02 | ENSG00000281741 |
| OR51E2     | 3,83  | 0,53  | 2,94E-02 | ENSG00000167332 |
| AL117190.2 | -2,23 | 7,36  | 2,94E-02 | ENSG00000258663 |
| GRIK3      | 2,97  | 3,74  | 2,95E-02 | ENSG00000163873 |
| PENK       | -4,27 | 4,34  | 2,95E-02 | ENSG00000181195 |
| AC009495.3 | -3,49 | 0,19  | 2,95E-02 | ENSG00000235192 |
| TUBE1      | -2,04 | 5,93  | 2,96E-02 | ENSG00000074935 |
| SLX4       | -2,03 | 4,93  | 2,96E-02 | ENSG00000188827 |
| ITGBL1     | 2,59  | 4,18  | 2,97E-02 | ENSG00000198542 |
| RPS6KA6    | -2,52 | 3,26  | 2,97E-02 | ENSG00000072133 |
| DUXAP8     | -2,89 | 3,44  | 2,97E-02 | ENSG00000206195 |
| RSU1       | 2,21  | 6,98  | 2,97E-02 | ENSG00000148484 |
| PLSCR3     | -5,77 | -0,39 | 2,97E-02 | ENSG00000187838 |
| HEYL       | 2,06  | 4,88  | 2,99E-02 | ENSG00000163909 |
| AP000696.1 | -4,98 | 1,37  | 2,99E-02 | ENSG00000231324 |
| CCNI2      | 2,69  | 3,37  | 3,00E-02 | ENSG00000205089 |
| DHRS13     | -2,43 | 3,97  | 3,01E-02 | ENSG00000167536 |
| TGFBR2     | 1,91  | 6,76  | 3,01E-02 | ENSG00000163513 |
| BCL6B      | 2,23  | 4,54  | 3,01E-02 | ENSG00000161940 |
| PCDHB11    | -3,04 | 2,72  | 3,01E-02 | ENSG00000197479 |
| LHX9       | -3,20 | 3,90  | 3,01E-02 | ENSG00000143355 |
| KIAA1324L  | -2,54 | 5,13  | 3,02E-02 | ENSG00000164659 |
| FOXL2      | -5,33 | 1,79  | 3,02E-02 | ENSG00000183770 |
| MAPK8IP1   | 2,22  | 5,63  | 3,02E-02 | ENSG00000121653 |
| TRAPPC3L   | 3,15  | 0,77  | 3,03E-02 | ENSG00000173626 |
| IGHV3-73   | -5,54 | 2,10  | 3,03E-02 | ENSG00000211976 |
| AC092384.2 | -3,20 | 1,33  | 3,03E-02 | ENSG00000259881 |
| AP000356.3 | -3,35 | 1,89  | 3,04E-02 | ENSG00000284128 |
| TTC28-AS1  | -2,07 | 5,83  | 3,04E-02 | ENSG00000235954 |
| PLOD2      | -2,42 | 7,22  | 3,04E-02 | ENSG00000152952 |
| PVT1       | -2,08 | 4,75  | 3,04E-02 | ENSG00000249859 |
| RAB40B     | 2,19  | 6,02  | 3,04E-02 | ENSG00000141542 |
| PMEPA1     | 2,05  | 7,68  | 3,04E-02 | ENSG00000124225 |
| BTG2       | 1,96  | 6,79  | 3,04E-02 | ENSG00000159388 |
| UCP1       | 4,39  | 0,31  | 3,04E-02 | ENSG00000109424 |
| HOXA13     | -4,08 | 4,46  | 3,05E-02 | ENSG00000106031 |
| AC093724.1 | -3,81 | 2,04  | 3,05E-02 | ENSG00000213222 |
| TST        | 2,37  | 4,08  | 3,05E-02 | ENSG00000128311 |
| FILIP1     | 2,50  | 3,46  | 3,05E-02 | ENSG00000118407 |
| ANXA9      | 2,82  | 2,82  | 3,06E-02 | ENSG00000143412 |
| VPS13B     | -1,94 | 6,35  | 3,06E-02 | ENSG00000132549 |
| CCNO       | -3,07 | 2,84  | 3,07E-02 | ENSG00000152669 |
| RAC2       | 2,25  | 4,30  | 3,07E-02 | ENSG00000128340 |
| EGFR-AS1   | -4,24 | 0,14  | 3,07E-02 | ENSG00000224057 |
| FKBP1C     | 4,21  | 0,04  | 3,08E-02 | ENSG00000198225 |
| AC020909.2 | 3,09  | 2,28  | 3,08E-02 | ENSG00000268518 |
| WDR91      | -2,00 | 6,67  | 3,09E-02 | ENSG00000105875 |
| CR381670.1 | -3,87 | 2,65  | 3,09E-02 | ENSG00000278931 |
| CHD7       | 2,14  | 4,75  | 3,10E-02 | ENSG00000171316 |
| AC007620.2 | 2,36  | 3,81  | 3,10E-02 | ENSG00000242539 |
| GTF2IP20   | -2,07 | 5,05  | 3,10E-02 | ENSG00000272645 |
| MDFI       | -2,14 | 6,05  | 3,10E-02 | ENSG00000112559 |
| L3MBTL1    | -2,16 | 5,18  | 3,11E-02 | ENSG00000185513 |

|            |       |       |          |                 |
|------------|-------|-------|----------|-----------------|
| IL1RL2     | -3,06 | 1,75  | 3,11E-02 | ENSG00000115598 |
| HERC2      | -2,33 | 8,19  | 3,11E-02 | ENSG00000128731 |
| AL591428.1 | -5,71 | -0,43 | 3,11E-02 | ENSG00000285652 |
| AC060780.1 | -2,03 | 5,13  | 3,12E-02 | ENSG00000267002 |
| ITGA9      | -2,03 | 5,79  | 3,13E-02 | ENSG00000144668 |
| HCN3       | -2,36 | 3,82  | 3,13E-02 | ENSG00000143630 |
| PLPP2      | -2,64 | 6,23  | 3,14E-02 | ENSG00000141934 |
| ADAM12     | -2,04 | 4,84  | 3,14E-02 | ENSG00000148848 |
| MMP11      | -2,08 | 7,00  | 3,14E-02 | ENSG00000099953 |
| PCA3       | 2,85  | 3,08  | 3,15E-02 | ENSG00000225937 |
| SLC25A27   | -2,91 | 6,64  | 3,15E-02 | ENSG00000153291 |
| EML4       | -2,12 | 7,42  | 3,15E-02 | ENSG00000143924 |
| SRCIN1     | -2,53 | 5,01  | 3,16E-02 | ENSG00000277363 |
| AC005703.6 | 2,59  | 3,81  | 3,16E-02 | ENSG00000279660 |
| NALCN      | 3,64  | 1,79  | 3,17E-02 | ENSG00000102452 |
| FRRS1L     | -3,16 | 2,09  | 3,17E-02 | ENSG00000260230 |
| TYRO3      | 2,34  | 4,86  | 3,17E-02 | ENSG00000092445 |
| AL021026.1 | 5,78  | -0,49 | 3,18E-02 | ENSG00000225243 |
| IL34       | 2,45  | 5,25  | 3,18E-02 | ENSG00000157368 |
| HECW1      | -4,19 | 1,80  | 3,18E-02 | ENSG00000002746 |
| P3H4       | -1,96 | 6,52  | 3,18E-02 | ENSG00000141696 |
| ADH6       | -3,08 | 2,17  | 3,18E-02 | ENSG00000172955 |
| TRNP1      | 2,33  | 4,43  | 3,18E-02 | ENSG00000253368 |
| HYMAI      | -3,21 | 1,53  | 3,19E-02 | ENSG00000283122 |
| CBX7       | 1,89  | 5,77  | 3,19E-02 | ENSG00000100307 |
| LFNG       | 2,25  | 4,77  | 3,19E-02 | ENSG00000106003 |
| CYP4F11    | -5,48 | 2,04  | 3,19E-02 | ENSG00000171903 |
| AL645608.7 | 3,23  | 1,83  | 3,19E-02 | ENSG00000272512 |
| HRCT1      | 2,85  | 2,58  | 3,19E-02 | ENSG00000196196 |
| MTCO1P12   | 2,58  | 6,83  | 3,20E-02 | ENSG00000237973 |
| ACTR3B     | 2,42  | 5,72  | 3,20E-02 | ENSG00000133627 |
| C6orf223   | -5,81 | -0,36 | 3,20E-02 | ENSG00000181577 |
| MID1IP1    | 2,17  | 5,39  | 3,20E-02 | ENSG00000165175 |
| PACSN3     | 2,29  | 5,98  | 3,21E-02 | ENSG00000165912 |
| AC090510.3 | -2,56 | 4,50  | 3,21E-02 | ENSG00000278769 |
| SIX2       | 3,05  | 2,10  | 3,21E-02 | ENSG00000170577 |
| PRTG       | -2,84 | 3,43  | 3,22E-02 | ENSG00000166450 |
| LRRC2      | 3,09  | 0,92  | 3,22E-02 | ENSG00000163827 |
| PANX3      | -5,95 | -0,26 | 3,22E-02 | ENSG00000154143 |
| Z98259.1   | -5,95 | -0,26 | 3,23E-02 | ENSG00000260972 |
| TPTE2P2    | -5,95 | -0,26 | 3,23E-02 | ENSG00000272281 |
| CPLANE1    | -1,87 | 5,52  | 3,23E-02 | ENSG00000197603 |
| LCP1       | 1,92  | 5,16  | 3,23E-02 | ENSG00000136167 |
| AC087521.1 | 2,36  | 4,78  | 3,24E-02 | ENSG00000244953 |
| EGR2       | 2,72  | 6,00  | 3,24E-02 | ENSG00000122877 |
| ARFGEF2    | -2,19 | 6,87  | 3,25E-02 | ENSG00000124198 |
| GMFG       | 2,24  | 4,81  | 3,26E-02 | ENSG00000130755 |
| MT1F       | 2,53  | 4,43  | 3,26E-02 | ENSG00000198417 |
| UBXN10     | 2,78  | 2,03  | 3,27E-02 | ENSG00000162543 |
| KDM5B      | -1,99 | 7,06  | 3,27E-02 | ENSG00000117139 |
| LINC01105  | -5,11 | 1,64  | 3,27E-02 | ENSG00000232044 |
| CSRNP3     | -2,23 | 5,06  | 3,28E-02 | ENSG00000178662 |
| EIF5       | 1,88  | 6,85  | 3,28E-02 | ENSG00000100664 |
| NRN1       | 2,38  | 4,58  | 3,29E-02 | ENSG00000124785 |
| MDGA2      | -4,88 | 4,21  | 3,29E-02 | ENSG00000139915 |
| IFI27L2    | 2,30  | 5,62  | 3,30E-02 | ENSG00000119632 |
| AC079089.1 | -4,72 | 1,51  | 3,31E-02 | ENSG00000246528 |
| AL445649.1 | -3,89 | 1,35  | 3,31E-02 | ENSG00000276740 |
| DAB2       | 1,96  | 6,81  | 3,31E-02 | ENSG00000153071 |
| NUP210     | 2,22  | 4,27  | 3,31E-02 | ENSG00000132182 |
| TMEM178B   | 3,38  | 4,34  | 3,31E-02 | ENSG00000261115 |
| GPSM3      | 2,30  | 5,09  | 3,32E-02 | ENSG00000213654 |
| NLRP3      | 2,82  | 2,76  | 3,33E-02 | ENSG00000162711 |
| C11orf87   | -3,86 | 1,77  | 3,33E-02 | ENSG00000185742 |

|            |       |       |          |                 |
|------------|-------|-------|----------|-----------------|
| SLC17A7    | 2,80  | 2,12  | 3,34E-02 | ENSG00000104888 |
| USP32P1    | -3,19 | 2,35  | 3,35E-02 | ENSG00000188933 |
| AC005339.1 | 2,41  | 3,53  | 3,35E-02 | ENSG00000268565 |
| PIM1       | 2,07  | 4,70  | 3,36E-02 | ENSG00000137193 |
| AL512662.2 | -4,32 | 1,37  | 3,36E-02 | ENSG00000283913 |
| BOC        | -2,20 | 7,92  | 3,36E-02 | ENSG00000144857 |
| KLHL2      | 1,99  | 5,26  | 3,36E-02 | ENSG00000109466 |
| AL021707.5 | 2,22  | 4,61  | 3,36E-02 | ENSG00000244491 |
| HES4       | 2,20  | 5,55  | 3,36E-02 | ENSG00000188290 |
| FOXI2      | -5,05 | 4,33  | 3,38E-02 | ENSG00000186766 |
| LPIN3      | -2,18 | 6,97  | 3,38E-02 | ENSG00000132793 |
| AC026369.1 | -3,99 | 0,91  | 3,38E-02 | ENSG00000249695 |
| AL031595.1 | 2,53  | 3,42  | 3,38E-02 | ENSG00000279933 |
| SYNM       | 2,28  | 6,90  | 3,39E-02 | ENSG00000182253 |
| LINC00622  | 2,99  | 1,48  | 3,39E-02 | ENSG00000260941 |
| GAL        | 3,29  | 0,93  | 3,40E-02 | ENSG00000069482 |
| TMEM63C    | 3,27  | 1,96  | 3,40E-02 | ENSG00000165548 |
| IFI44L     | 2,09  | 5,25  | 3,40E-02 | ENSG00000137959 |
| ALB        | -3,16 | 1,34  | 3,40E-02 | ENSG00000163631 |
| ZNF208     | -2,89 | 2,80  | 3,40E-02 | ENSG00000160321 |
| HYAL1      | -2,27 | 4,67  | 3,41E-02 | ENSG00000114378 |
| AL031600.1 | -3,53 | 1,66  | 3,41E-02 | ENSG00000260051 |
| UVSSA      | -1,89 | 6,39  | 3,41E-02 | ENSG00000163945 |
| AF181450.1 | -3,73 | 0,35  | 3,41E-02 | ENSG00000253576 |
| GDF15      | 2,09  | 5,11  | 3,41E-02 | ENSG00000130513 |
| PLCB2      | 2,41  | 6,15  | 3,42E-02 | ENSG00000137841 |
| AP001636.3 | 3,86  | 1,06  | 3,42E-02 | ENSG00000255240 |
| AC004765.1 | -5,83 | -0,36 | 3,43E-02 | ENSG00000285704 |
| SLC7A7     | 2,42  | 3,72  | 3,43E-02 | ENSG00000155465 |
| RARRES3    | 2,17  | 4,28  | 3,43E-02 | ENSG00000133321 |
| ANKRD29    | 2,37  | 4,24  | 3,43E-02 | ENSG00000154065 |
| CSTA       | 2,90  | 2,46  | 3,44E-02 | ENSG00000121552 |
| SYNGR3     | -3,65 | 2,47  | 3,44E-02 | ENSG00000127561 |
| SH3BP5     | 1,99  | 6,71  | 3,44E-02 | ENSG00000131370 |
| DLEU7      | 3,58  | 0,29  | 3,44E-02 | ENSG00000186047 |
| LINC02458  | 3,44  | 0,66  | 3,44E-02 | ENSG00000246363 |
| AC004585.1 | 5,77  | -0,57 | 3,45E-02 | ENSG00000266088 |
| AC008780.2 | 5,77  | -0,57 | 3,45E-02 | ENSG00000249436 |
| CERKL      | -2,70 | 5,46  | 3,45E-02 | ENSG00000188452 |
| RASAL1     | 4,20  | 2,74  | 3,45E-02 | ENSG00000111344 |
| AC016026.1 | -5,68 | -0,45 | 3,45E-02 | ENSG00000093100 |
| AL355377.2 | 4,08  | -0,06 | 3,45E-02 | ENSG00000279489 |
| PCDHB5     | -2,68 | 2,61  | 3,46E-02 | ENSG00000113209 |
| HIST2H2BD  | -2,25 | 3,94  | 3,46E-02 | ENSG00000220323 |
| HIST1H2BJ  | 3,12  | 0,73  | 3,46E-02 | ENSG00000124635 |
| UBASH3A    | 2,82  | 1,31  | 3,48E-02 | ENSG00000160185 |
| PLPPR4     | 2,53  | 3,98  | 3,48E-02 | ENSG00000117600 |
| AC092375.2 | 3,21  | 0,95  | 3,49E-02 | ENSG00000260306 |
| BAIAP2L1   | -2,31 | 5,24  | 3,49E-02 | ENSG00000006453 |
| N4BP3      | 2,81  | 1,84  | 3,49E-02 | ENSG00000145911 |
| LINC00920  | 4,12  | -0,03 | 3,49E-02 | ENSG00000246898 |
| AL031666.1 | 4,12  | -0,03 | 3,50E-02 | ENSG00000231119 |
| TRIML2     | -3,99 | 4,08  | 3,50E-02 | ENSG00000179046 |
| AGGF1P2    | 4,38  | 0,22  | 3,51E-02 | ENSG00000233435 |
| CCDC43     | 2,08  | 5,39  | 3,51E-02 | ENSG00000180329 |
| GZMK       | 2,74  | 2,34  | 3,52E-02 | ENSG00000113088 |
| ST6GAL2    | 2,67  | 5,15  | 3,52E-02 | ENSG00000144057 |
| AC243962.1 | 4,26  | 0,20  | 3,52E-02 | ENSG00000225370 |
| ITLN1      | 4,89  | 2,57  | 3,52E-02 | ENSG00000179914 |
| CCR5       | 2,57  | 2,54  | 3,52E-02 | ENSG00000160791 |
| NYAP1      | -4,07 | 3,65  | 3,53E-02 | ENSG00000166924 |
| ACAN       | -2,78 | 6,68  | 3,53E-02 | ENSG00000157766 |
| FAM84B     | -2,62 | 5,90  | 3,53E-02 | ENSG00000168672 |
| NUP210L    | -3,38 | 0,11  | 3,53E-02 | ENSG00000143552 |

|            |       |       |          |                 |
|------------|-------|-------|----------|-----------------|
| ZIC2       | -5,04 | 1,58  | 3,54E-02 | ENSG00000043355 |
| MDGA1      | 2,25  | 6,75  | 3,54E-02 | ENSG00000112139 |
| MPP3       | 2,91  | 5,81  | 3,54E-02 | ENSG00000161647 |
| AC015922.3 | 2,55  | 2,83  | 3,54E-02 | ENSG00000276855 |
| GOLGA8A    | -2,07 | 8,97  | 3,55E-02 | ENSG00000175265 |
| NPR1       | 2,52  | 4,03  | 3,55E-02 | ENSG00000169418 |
| AC243829.4 | 2,46  | 4,38  | 3,55E-02 | ENSG00000277089 |
| PTGER1     | -3,89 | 1,35  | 3,55E-02 | ENSG00000160951 |
| AC026471.3 | -3,54 | 0,60  | 3,56E-02 | ENSG00000260740 |
| AC007906.2 | 3,02  | 1,81  | 3,56E-02 | ENSG00000277639 |
| TRAF3IP3   | 2,46  | 3,58  | 3,56E-02 | ENSG00000009790 |
| LINC01736  | 4,29  | 0,23  | 3,56E-02 | ENSG00000228058 |
| TMEM100    | 2,73  | 2,37  | 3,56E-02 | ENSG00000166292 |
| AL138963.3 | 1,97  | 9,89  | 3,57E-02 | ENSG00000273149 |
| AL354811.1 | -3,55 | 0,22  | 3,57E-02 | ENSG00000278177 |
| FOXL1      | 2,70  | 2,82  | 3,57E-02 | ENSG00000176678 |
| OR2W3      | -5,81 | -0,37 | 3,57E-02 | ENSG00000238243 |
| POPDC3     | 3,33  | 4,16  | 3,57E-02 | ENSG00000132429 |
| KCNC3      | 2,80  | 2,91  | 3,57E-02 | ENSG00000131398 |
| CNTNAP1    | -2,20 | 6,04  | 3,58E-02 | ENSG00000108797 |
| SLC4A4     | 3,26  | 1,73  | 3,58E-02 | ENSG00000080493 |
| C10orf55   | 2,53  | 3,31  | 3,59E-02 | ENSG00000222047 |
| AC016597.1 | -5,79 | -0,37 | 3,59E-02 | ENSG00000261329 |
| GOLGA7B    | 2,70  | 2,58  | 3,60E-02 | ENSG00000155265 |
| INKA2-AS1  | 2,96  | 1,25  | 3,61E-02 | ENSG00000227811 |
| FRMD1      | 4,86  | 2,80  | 3,62E-02 | ENSG00000153303 |
| SIX1       | -2,72 | 4,64  | 3,62E-02 | ENSG00000126778 |
| RERG       | 2,09  | 4,73  | 3,63E-02 | ENSG00000134533 |
| KLHDC9     | -2,61 | 2,66  | 3,63E-02 | ENSG00000162755 |
| ST6GALNAC5 | 3,03  | 3,90  | 3,63E-02 | ENSG00000117069 |
| LRGUK      | -3,00 | 2,95  | 3,63E-02 | ENSG00000155530 |
| FAM9B      | -4,15 | 0,07  | 3,63E-02 | ENSG00000177138 |
| STK39      | -2,15 | 4,99  | 3,63E-02 | ENSG00000198648 |
| GOLM1      | -1,85 | 7,34  | 3,64E-02 | ENSG00000135052 |
| CIPC       | 2,32  | 4,12  | 3,64E-02 | ENSG00000198894 |
| DCAF12L2   | -3,85 | 1,10  | 3,64E-02 | ENSG00000198354 |
| ZG16B      | 3,49  | 3,45  | 3,65E-02 | ENSG00000162078 |
| GPR34      | 2,42  | 3,74  | 3,65E-02 | ENSG00000171659 |
| GPR83      | 5,61  | -0,64 | 3,65E-02 | ENSG00000123901 |
| ARL4D      | 2,56  | 3,65  | 3,65E-02 | ENSG00000175906 |
| ROR2       | -1,81 | 5,69  | 3,65E-02 | ENSG00000169071 |
| ASTN2      | 2,20  | 4,51  | 3,66E-02 | ENSG00000148219 |
| SLC35E2A   | -1,92 | 5,55  | 3,66E-02 | ENSG00000215790 |
| ADCY1      | 2,61  | 2,52  | 3,67E-02 | ENSG00000164742 |
| ALDH1A2    | -3,74 | 4,82  | 3,67E-02 | ENSG00000128918 |
| Z84488.1   | 2,75  | 2,13  | 3,67E-02 | ENSG00000244158 |
| OLFM4      | 4,10  | -0,02 | 3,67E-02 | ENSG00000102837 |
| ALDH1A1    | 2,25  | 3,82  | 3,68E-02 | ENSG00000165092 |
| AL390728.3 | -3,41 | 0,13  | 3,68E-02 | ENSG00000224014 |
| AC099548.2 | -3,41 | 0,13  | 3,68E-02 | ENSG00000253882 |
| METRNL     | 1,96  | 5,30  | 3,68E-02 | ENSG00000103260 |
| MAGEA4     | -5,86 | -0,32 | 3,68E-02 | ENSG00000147381 |
| SUN2       | 2,04  | 7,79  | 3,69E-02 | ENSG00000100242 |
| SCD5       | 2,06  | 5,93  | 3,69E-02 | ENSG00000145284 |
| MYL12A     | 1,86  | 7,85  | 3,70E-02 | ENSG00000101608 |
| CCR2       | 2,89  | 1,97  | 3,70E-02 | ENSG00000121807 |
| FRMD8      | 1,96  | 6,38  | 3,70E-02 | ENSG00000126391 |
| QPCT       | 2,55  | 2,58  | 3,70E-02 | ENSG00000115828 |
| TRIM58     | -3,68 | 0,32  | 3,71E-02 | ENSG00000162722 |
| SLC28A3    | 3,94  | 1,30  | 3,71E-02 | ENSG00000197506 |
| RGS5       | 1,84  | 7,10  | 3,72E-02 | ENSG00000143248 |
| TPM1       | 1,89  | 8,68  | 3,73E-02 | ENSG00000140416 |
| AC068385.1 | 2,25  | 4,14  | 3,73E-02 | ENSG00000255498 |
| ZNF608     | 2,09  | 4,77  | 3,74E-02 | ENSG00000168916 |

|            |       |       |          |                  |
|------------|-------|-------|----------|------------------|
| GIN3       | 2,53  | 3,57  | 3,74E-02 | ENSG00000181938  |
| AL359091.4 | -2,90 | 1,10  | 3,74E-02 | ENSG00000272696  |
| WARS       | 1,95  | 7,22  | 3,75E-02 | ENSG00000140105  |
| AC008676.3 | 2,82  | 2,38  | 3,75E-02 | ENSG00000285868  |
| SLC38A8    | 4,03  | -0,01 | 3,75E-02 | ENSG00000166558  |
| AC011495.3 | 3,52  | 1,17  | 3,76E-02 | ENSG00000268677  |
| SYT5       | 3,08  | 1,64  | 3,76E-02 | ENSG00000129990  |
| ZSWIM5     | -2,38 | 4,20  | 3,77E-02 | ENSG00000162415  |
| MYL1       | 5,63  | -0,59 | 3,77E-02 | ENSG00000168530  |
| ZNF99      | -3,52 | 0,21  | 3,78E-02 | ENSG00000213973  |
| PMEL       | -2,16 | 4,44  | 3,78E-02 | ENSG00000185664  |
| AC005005.3 | 2,50  | 3,07  | 3,78E-02 | ENSG00000273387  |
| MAGEH1     | -2,43 | 6,63  | 3,79E-02 | ENSG00000187601  |
| SLC6A17    | 3,21  | 1,32  | 3,79E-02 | ENSG00000197106  |
| LUARIS     | -4,05 | 1,12  | 3,80E-02 | ENSG00000231638  |
| AP005131.1 | -4,14 | 0,07  | 3,80E-02 | ENSG00000267136  |
| LINC02102  | -4,14 | 0,07  | 3,80E-02 | ENSG00000248677  |
| MIR210HG   | -2,33 | 4,22  | 3,80E-02 | ENSG00000247095  |
| MFSD13B    | -3,50 | 0,18  | 3,81E-02 | ENSG00000230872  |
| CSPG4P10   | -2,56 | 3,23  | 3,81E-02 | ENSG00000276710  |
| MIOX       | 4,65  | 3,52  | 3,81E-02 | ENSG00000100253  |
| DUSP5      | 1,88  | 5,13  | 3,81E-02 | ENSG00000138166  |
| ELOVL5     | 1,99  | 6,57  | 3,82E-02 | ENSG000000012660 |
| AC097493.4 | 4,19  | 0,15  | 3,82E-02 | ENSG00000284648  |
| TCF15      | 2,79  | 1,71  | 3,82E-02 | ENSG00000125878  |
| KCNG2      | 3,06  | 2,08  | 3,82E-02 | ENSG00000178342  |
| SIRPB2     | 2,91  | 2,03  | 3,82E-02 | ENSG00000196209  |
| ASCL2      | 3,19  | 1,54  | 3,82E-02 | ENSG00000183734  |
| BX119927.1 | 6,17  | -0,43 | 3,83E-02 | ENSG00000283178  |
| USHBP1     | 2,71  | 3,88  | 3,84E-02 | ENSG00000130307  |
| AL591845.1 | -2,24 | 4,10  | 3,84E-02 | ENSG00000116883  |
| NSA2       | 1,85  | 6,10  | 3,85E-02 | ENSG00000164346  |
| TMEM132B   | 2,79  | 2,83  | 3,85E-02 | ENSG00000139364  |
| SELP       | 3,39  | 3,97  | 3,85E-02 | ENSG00000174175  |
| AC241644.1 | 5,71  | -0,54 | 3,86E-02 | ENSG00000227139  |
| LINC00706  | 5,71  | -0,54 | 3,86E-02 | ENSG00000281186  |
| MIR5689HG  | 5,71  | -0,54 | 3,87E-02 | ENSG00000229401  |
| CDH5       | 1,96  | 6,40  | 3,87E-02 | ENSG00000179776  |
| MGAT5B     | -3,10 | 2,66  | 3,87E-02 | ENSG00000167889  |
| PLPBP      | 2,00  | 4,65  | 3,87E-02 | ENSG00000147471  |
| EMILIN1    | -2,45 | 7,70  | 3,88E-02 | ENSG00000138080  |
| PCOLCE-AS1 | -2,86 | 6,73  | 3,88E-02 | ENSG00000224729  |
| NRL        | 2,89  | 1,37  | 3,89E-02 | ENSG00000129535  |
| BIRC6-AS2  | -5,66 | -0,46 | 3,90E-02 | ENSG00000279897  |
| ARRB1      | 2,15  | 4,17  | 3,90E-02 | ENSG00000137486  |
| FSIP2-AS1  | -3,26 | 1,26  | 3,91E-02 | ENSG00000231646  |
| LINC01945  | -4,22 | 1,38  | 3,91E-02 | ENSG00000236485  |
| HOXC11     | -2,41 | 3,18  | 3,91E-02 | ENSG00000123388  |
| ANOS1      | -2,36 | 5,12  | 3,92E-02 | ENSG00000011201  |
| SLC9A7     | 2,31  | 5,16  | 3,92E-02 | ENSG00000065923  |
| MIR1184-1  | -3,16 | 1,34  | 3,93E-02 | ENSG00000221533  |
| LINC01778  | 3,70  | 1,15  | 3,93E-02 | ENSG00000223382  |
| C12orf56   | -3,98 | 3,27  | 3,93E-02 | ENSG00000185306  |
| DLX6-AS1   | -3,69 | 3,37  | 3,93E-02 | ENSG00000231764  |
| TFF3       | 4,16  | 0,00  | 3,93E-02 | ENSG00000160180  |
| TREML1     | 4,36  | 1,56  | 3,93E-02 | ENSG00000161911  |
| TFDP1      | 1,88  | 5,58  | 3,94E-02 | ENSG00000198176  |
| ADGRD1     | 2,31  | 4,79  | 3,94E-02 | ENSG00000111452  |
| UGT2B7     | 4,23  | 1,08  | 3,94E-02 | ENSG00000171234  |
| FASLG      | 3,15  | 0,41  | 3,95E-02 | ENSG00000117560  |
| CDH4       | -2,28 | 6,22  | 3,95E-02 | ENSG00000179242  |
| RPL3       | 1,91  | 10,12 | 3,95E-02 | ENSG00000100316  |
| AL590369.1 | -2,74 | 1,51  | 3,96E-02 | ENSG00000234789  |
| BCORL1     | -1,91 | 5,16  | 3,97E-02 | ENSG00000085185  |

|            |       |       |          |                 |
|------------|-------|-------|----------|-----------------|
| ITIH2      | 2,97  | 1,34  | 3,97E-02 | ENSG00000151655 |
| TMEM273    | 2,38  | 4,54  | 3,97E-02 | ENSG00000204161 |
| ELOVL4     | 2,76  | 2,45  | 3,98E-02 | ENSG00000118402 |
| EFNA3      | -2,77 | 3,17  | 3,98E-02 | ENSG00000143590 |
| PPP1R1B    | 3,48  | 1,75  | 3,98E-02 | ENSG00000131771 |
| LUM        | 1,84  | 8,21  | 3,99E-02 | ENSG00000139329 |
| CR381653.2 | -2,26 | 3,78  | 3,99E-02 | ENSG00000279208 |
| MFNG       | 2,29  | 3,89  | 4,00E-02 | ENSG00000100060 |
| SLC16A4    | 2,46  | 3,65  | 4,00E-02 | ENSG00000168679 |
| FAAH       | -2,02 | 4,82  | 4,00E-02 | ENSG00000117480 |
| PLAU       | 1,99  | 5,45  | 4,00E-02 | ENSG00000122861 |
| CASK       | -1,87 | 6,10  | 4,00E-02 | ENSG00000147044 |
| WDR19      | -1,83 | 5,63  | 4,00E-02 | ENSG00000157796 |
| SLC45A3    | -2,30 | 4,34  | 4,01E-02 | ENSG00000158715 |
| IGSF21     | -3,07 | 4,88  | 4,01E-02 | ENSG00000117154 |
| ANKRD36    | -2,13 | 4,19  | 4,03E-02 | ENSG00000135976 |
| HLA-DPB1   | 2,20  | 7,89  | 4,03E-02 | ENSG00000223865 |
| HEY1       | 2,14  | 4,99  | 4,04E-02 | ENSG00000164683 |
| ABHD11-AS1 | 2,57  | 4,37  | 4,05E-02 | ENSG00000225969 |
| AC245140.2 | 1,94  | 7,15  | 4,05E-02 | ENSG00000280195 |
| BOK-AS1    | 2,74  | 1,05  | 4,05E-02 | ENSG00000234235 |
| DUSP1      | 1,85  | 8,68  | 4,06E-02 | ENSG00000120129 |
| IGSF8      | -2,38 | 6,59  | 4,06E-02 | ENSG00000162729 |
| AC211476.2 | -5,55 | -0,53 | 4,06E-02 | ENSG00000272843 |
| LINC00894  | -2,28 | 3,69  | 4,07E-02 | ENSG00000235703 |
| CBR3       | 2,17  | 3,97  | 4,07E-02 | ENSG00000159231 |
| AC009495.1 | -4,02 | -0,02 | 4,07E-02 | ENSG00000229195 |
| DNM1       | -2,03 | 7,54  | 4,07E-02 | ENSG00000106976 |
| STAG3L5P   | -2,53 | 3,40  | 4,07E-02 | ENSG00000242294 |
| AL139241.1 | 2,87  | 1,95  | 4,07E-02 | ENSG00000230928 |
| GNB4       | 1,84  | 5,20  | 4,08E-02 | ENSG00000114450 |
| BEST4      | -3,07 | 3,16  | 4,08E-02 | ENSG00000142959 |
| RORA       | -2,22 | 6,44  | 4,08E-02 | ENSG00000069667 |
| MSTN       | -2,89 | 2,83  | 4,09E-02 | ENSG00000138379 |
| TMEM116    | -2,29 | 4,74  | 4,09E-02 | ENSG00000198270 |
| NR4A1      | 2,01  | 8,97  | 4,09E-02 | ENSG00000123358 |
| AC104083.1 | 2,23  | 3,89  | 4,09E-02 | ENSG00000260244 |
| DTX1       | 2,61  | 4,98  | 4,11E-02 | ENSG00000135144 |
| C22orf46   | 2,15  | 4,52  | 4,11E-02 | ENSG00000184208 |
| ARPN       | 1,91  | 5,01  | 4,12E-02 | ENSG00000242498 |
| ENPP4      | 2,19  | 4,24  | 4,12E-02 | ENSG00000001561 |
| AMER2      | -5,21 | 1,80  | 4,12E-02 | ENSG00000165566 |
| KATNAL2    | -2,20 | 4,46  | 4,12E-02 | ENSG00000167216 |
| AL391832.2 | -3,42 | 0,13  | 4,13E-02 | ENSG00000238005 |
| MTFP1      | -3,68 | 0,29  | 4,13E-02 | ENSG00000242114 |
| KLK6       | 3,94  | -0,08 | 4,13E-02 | ENSG00000167755 |
| RN7SL356P  | 3,94  | -0,08 | 4,13E-02 | ENSG00000266553 |
| AC016738.1 | -2,61 | 3,70  | 4,14E-02 | ENSG00000223947 |
| S100A14    | 4,64  | 0,26  | 4,14E-02 | ENSG00000189334 |
| PROS1      | 1,82  | 5,84  | 4,14E-02 | ENSG00000184500 |
| AC092171.5 | -2,94 | 1,57  | 4,15E-02 | ENSG00000273084 |
| PRSS33     | 4,18  | 1,83  | 4,15E-02 | ENSG00000103355 |
| VAT1       | 1,99  | 7,44  | 4,16E-02 | ENSG00000108828 |
| GJB3       | 3,70  | 0,47  | 4,16E-02 | ENSG00000188910 |
| CAMK2D     | 1,92  | 6,32  | 4,16E-02 | ENSG00000145349 |
| KCNC1      | 3,92  | 3,17  | 4,17E-02 | ENSG00000129159 |
| NR1H3      | 1,88  | 5,36  | 4,17E-02 | ENSG00000025434 |
| ARRDC4     | 1,88  | 4,98  | 4,17E-02 | ENSG00000140450 |
| AL033379.1 | -3,35 | 1,13  | 4,18E-02 | ENSG00000224384 |
| ANXA13     | -3,83 | 1,76  | 4,18E-02 | ENSG00000104537 |
| GDAP1      | 2,62  | 2,83  | 4,18E-02 | ENSG00000104381 |
| EIF1AXP1   | 4,33  | 0,02  | 4,18E-02 | ENSG00000236698 |
| ZNF560     | -5,58 | -0,51 | 4,19E-02 | ENSG00000198028 |
| AGAP14P    | -2,87 | 1,08  | 4,19E-02 | ENSG00000279058 |



|            |       |       |          |                 |
|------------|-------|-------|----------|-----------------|
| SLC13A4    | -2,45 | 3,54  | 4,19E-02 | ENSG00000164707 |
| FABP7      | 4,73  | 1,69  | 4,20E-02 | ENSG00000164434 |
| LBX2-AS1   | 2,35  | 3,58  | 4,21E-02 | ENSG00000257702 |
| SKIV2L     | -1,88 | 6,49  | 4,21E-02 | ENSG00000204351 |
| SDR42E1    | -3,29 | 2,48  | 4,21E-02 | ENSG00000184860 |
| FAM228B    | 1,90  | 5,53  | 4,22E-02 | ENSG00000219626 |
| KRT19      | 4,04  | 2,89  | 4,22E-02 | ENSG00000171345 |
| PDLIM4     | 1,96  | 6,60  | 4,22E-02 | ENSG00000131435 |
| LNX1       | -2,01 | 5,42  | 4,22E-02 | ENSG00000072201 |
| RASSF9     | -2,43 | 3,96  | 4,23E-02 | ENSG00000198774 |
| CD53       | 2,16  | 4,92  | 4,24E-02 | ENSG00000143119 |
| MMD        | 2,23  | 4,94  | 4,24E-02 | ENSG00000108960 |
| AC008750.1 | 3,66  | 0,92  | 4,24E-02 | ENSG00000254760 |
| AC009065.2 | -1,90 | 5,12  | 4,24E-02 | ENSG00000259933 |
| HOXC-AS3   | -2,76 | 2,61  | 4,24E-02 | ENSG00000251151 |
| AL592430.2 | -4,30 | 0,16  | 4,25E-02 | ENSG00000282121 |
| AC016582.1 | -2,96 | 1,28  | 4,25E-02 | ENSG00000225868 |
| CHST9      | -5,76 | -0,39 | 4,25E-02 | ENSG00000154080 |
| AC010913.1 | -3,50 | 0,55  | 4,26E-02 | ENSG00000272702 |
| AC055733.4 | -5,17 | 1,77  | 4,26E-02 | ENSG00000284095 |
| TPSAB1     | -2,65 | 2,22  | 4,27E-02 | ENSG00000172236 |
| KIF6       | 2,87  | 1,39  | 4,28E-02 | ENSG00000164627 |
| ACSS1      | 1,89  | 5,04  | 4,28E-02 | ENSG00000154930 |
| PRR5L      | 2,36  | 3,62  | 4,28E-02 | ENSG00000135362 |
| TMOD2      | 1,98  | 4,58  | 4,29E-02 | ENSG00000128872 |
| SIGLEC7    | 3,00  | 1,56  | 4,29E-02 | ENSG00000168995 |
| IGSF10     | -2,42 | 4,29  | 4,29E-02 | ENSG00000152580 |
| AL669831.1 | -2,48 | 2,43  | 4,29E-02 | ENSG00000228327 |
| LINC02202  | 3,09  | 1,08  | 4,29E-02 | ENSG00000245812 |
| CFAP44     | -1,82 | 7,03  | 4,29E-02 | ENSG00000206530 |
| GLT8D2     | -1,90 | 6,08  | 4,30E-02 | ENSG00000120820 |
| C1QTNF3    | -2,62 | 4,90  | 4,30E-02 | ENSG00000082196 |
| OAS2       | 2,03  | 4,52  | 4,30E-02 | ENSG00000111335 |
| IGFBP7     | 1,80  | 9,13  | 4,31E-02 | ENSG00000163453 |
| EVI2A      | 2,49  | 3,21  | 4,31E-02 | ENSG00000126860 |
| LILRB4     | 2,50  | 3,83  | 4,31E-02 | ENSG00000186818 |
| APCDD1L    | 3,28  | 2,39  | 4,31E-02 | ENSG00000198768 |
| AC020663.3 | -5,69 | -0,44 | 4,31E-02 | ENSG00000275056 |
| WLS        | -1,89 | 6,39  | 4,31E-02 | ENSG00000116729 |
| DIPK2B     | 1,92  | 5,52  | 4,32E-02 | ENSG00000147113 |
| ANO5       | -2,36 | 4,47  | 4,33E-02 | ENSG00000171714 |
| AC008738.3 | 2,69  | 3,65  | 4,33E-02 | ENSG00000267580 |
| TIE1       | 2,37  | 7,64  | 4,34E-02 | ENSG00000066056 |
| ZNF436     | 1,82  | 5,44  | 4,35E-02 | ENSG00000125945 |
| AC008750.2 | 3,82  | 0,52  | 4,35E-02 | ENSG00000255441 |
| BIN1       | 2,00  | 6,14  | 4,35E-02 | ENSG00000136717 |
| PPP1R13L   | -2,00 | 5,70  | 4,35E-02 | ENSG00000104881 |
| RAB11FIP5  | -1,85 | 6,06  | 4,36E-02 | ENSG00000135631 |
| AJ239328.1 | 3,38  | 0,84  | 4,36E-02 | ENSG00000280604 |
| TPPP3      | 2,05  | 5,64  | 4,36E-02 | ENSG00000159713 |
| LINC02615  | -2,28 | 3,74  | 4,37E-02 | ENSG00000251432 |
| AC091182.2 | 3,36  | 0,12  | 4,37E-02 | ENSG00000253746 |
| GPR141     | -3,20 | 2,04  | 4,37E-02 | ENSG00000187037 |
| POFUT2     | -1,75 | 7,22  | 4,39E-02 | ENSG00000186866 |
| AC016738.2 | -3,25 | 0,39  | 4,40E-02 | ENSG00000230140 |
| FCMR       | 2,59  | 1,84  | 4,40E-02 | ENSG00000162894 |
| ENPP2      | -1,87 | 5,98  | 4,40E-02 | ENSG00000136960 |
| MEI1       | -2,50 | 3,09  | 4,41E-02 | ENSG00000167077 |
| NECTIN3    | 2,40  | 3,52  | 4,41E-02 | ENSG00000177707 |
| AL450326.1 | 3,18  | -0,04 | 4,42E-02 | ENSG00000230555 |
| NR3C2      | -2,55 | 4,28  | 4,42E-02 | ENSG00000151623 |
| GLDN       | 2,21  | 5,57  | 4,42E-02 | ENSG00000186417 |
| PGF        | 1,76  | 5,65  | 4,42E-02 | ENSG00000119630 |
| SCARNA7    | -3,43 | 2,24  | 4,43E-02 | ENSG00000238741 |

|             |       |       |          |                 |
|-------------|-------|-------|----------|-----------------|
| PPFIA2-AS1  | -5,14 | 1,75  | 4,43E-02 | ENSG00000257467 |
| SEMA3C      | 2,78  | 6,14  | 4,45E-02 | ENSG00000075223 |
| CR392039.4  | -3,79 | 0,78  | 4,46E-02 | ENSG00000279720 |
| GMFB        | 1,87  | 5,95  | 4,46E-02 | ENSG00000197045 |
| BX470102.2  | 2,92  | 1,49  | 4,46E-02 | ENSG00000285867 |
| AFDN        | -1,88 | 7,44  | 4,46E-02 | ENSG00000130396 |
| AC090559.1  | 3,08  | 0,76  | 4,47E-02 | ENSG00000255197 |
| MFAP3L      | 2,45  | 3,05  | 4,47E-02 | ENSG00000198948 |
| KNDC1       | 3,52  | 6,91  | 4,48E-02 | ENSG00000171798 |
| CABIN1      | -1,99 | 7,83  | 4,50E-02 | ENSG00000099991 |
| LINC02577   | 3,19  | 2,11  | 4,51E-02 | ENSG00000228742 |
| AP005329.1  | 1,88  | 6,48  | 4,51E-02 | ENSG00000264235 |
| GATA3       | -2,62 | 4,27  | 4,51E-02 | ENSG00000107485 |
| GLT1D1      | -3,39 | 2,01  | 4,52E-02 | ENSG00000151948 |
| TRPV4       | 2,35  | 4,83  | 4,53E-02 | ENSG00000111199 |
| BHMT        | 2,85  | 3,44  | 4,53E-02 | ENSG00000145692 |
| FRG1DP      | -3,49 | 2,40  | 4,54E-02 | ENSG00000282870 |
| SLAMF7      | 2,41  | 2,79  | 4,54E-02 | ENSG00000026751 |
| PKP2        | -3,05 | 5,19  | 4,54E-02 | ENSG00000057294 |
| CLIC4       | 1,86  | 8,48  | 4,54E-02 | ENSG00000169504 |
| NPAS2       | -2,14 | 5,65  | 4,55E-02 | ENSG00000170485 |
| TFPI        | 1,87  | 4,92  | 4,55E-02 | ENSG00000003436 |
| ADAMTS19    | -4,75 | 1,21  | 4,56E-02 | ENSG00000145808 |
| UNC80       | 3,30  | 1,77  | 4,56E-02 | ENSG00000144406 |
| CUL7        | -1,76 | 6,78  | 4,58E-02 | ENSG00000044090 |
| AC099568.2  | 3,93  | -0,14 | 4,58E-02 | ENSG00000272931 |
| RGS16       | 1,77  | 5,54  | 4,58E-02 | ENSG00000143333 |
| PNMA6A      | -2,76 | 1,69  | 4,58E-02 | ENSG00000235961 |
| TTC17       | -1,77 | 7,47  | 4,58E-02 | ENSG00000052841 |
| AP000688.2  | 4,03  | 0,03  | 4,58E-02 | ENSG00000233393 |
| TP53I11     | 1,87  | 5,14  | 4,58E-02 | ENSG00000175274 |
| PRKG2       | -3,72 | 2,65  | 4,60E-02 | ENSG00000138669 |
| GOLGA7      | 1,76  | 6,11  | 4,61E-02 | ENSG00000147533 |
| SLC14A1     | 2,91  | 1,63  | 4,61E-02 | ENSG00000141469 |
| AC009237.15 | -3,53 | 0,59  | 4,62E-02 | ENSG00000273305 |
| AMIGO2      | 2,54  | 2,65  | 4,63E-02 | ENSG00000139211 |
| GFOD1-AS1   | 3,91  | -0,16 | 4,63E-02 | ENSG00000237786 |
| PHLDA1      | 1,83  | 7,36  | 4,63E-02 | ENSG00000139289 |
| EME2        | -1,75 | 7,93  | 4,63E-02 | ENSG00000197774 |
| APBB1IP     | 2,45  | 3,62  | 4,64E-02 | ENSG00000077420 |
| AC005277.1  | 3,98  | -0,14 | 4,64E-02 | ENSG00000263707 |
| CHGB        | 3,98  | -0,14 | 4,64E-02 | ENSG00000089199 |
| APOBEC3G    | 2,20  | 4,03  | 4,64E-02 | ENSG00000239713 |
| AL157871.1  | 1,87  | 6,14  | 4,64E-02 | ENSG00000258504 |
| DOCK5       | -1,96 | 7,20  | 4,64E-02 | ENSG00000147459 |
| E2F8        | 2,79  | 2,40  | 4,64E-02 | ENSG00000129173 |
| IGFBP2      | 1,75  | 5,66  | 4,65E-02 | ENSG00000115457 |
| AC083855.2  | 2,84  | 1,79  | 4,65E-02 | ENSG00000285906 |
| AC092364.2  | -5,49 | -0,56 | 4,65E-02 | ENSG00000269845 |
| SPATS2      | -1,74 | 6,23  | 4,66E-02 | ENSG00000123352 |
| IGFBP4      | 1,74  | 8,50  | 4,66E-02 | ENSG00000141753 |
| MFSD6       | 2,05  | 5,45  | 4,66E-02 | ENSG00000151690 |
| IRF8        | 2,33  | 4,43  | 4,67E-02 | ENSG00000140968 |
| ITGA4       | -2,87 | 5,29  | 4,67E-02 | ENSG00000115232 |
| GRIK5       | 2,59  | 3,10  | 4,67E-02 | ENSG00000105737 |
| FAM138E     | 5,46  | -0,70 | 4,67E-02 | ENSG00000248893 |
| AP001107.5  | 2,73  | 1,06  | 4,67E-02 | ENSG00000254510 |
| RALGPS1     | -2,07 | 4,09  | 4,68E-02 | ENSG00000136828 |
| LINC02398   | -4,04 | 1,14  | 4,68E-02 | ENSG00000256287 |
| TMCC3       | 1,98  | 4,36  | 4,69E-02 | ENSG00000057704 |
| RFX2        | -2,21 | 5,68  | 4,70E-02 | ENSG00000087903 |
| TDRD9       | -3,00 | 3,65  | 4,70E-02 | ENSG00000156414 |
| LRSAM1      | -1,74 | 5,91  | 4,71E-02 | ENSG00000148356 |
| UPP1        | 1,80  | 5,82  | 4,71E-02 | ENSG00000183696 |

|            |       |       |          |                 |
|------------|-------|-------|----------|-----------------|
| ST8SIA1    | -3,29 | 3,71  | 4,71E-02 | ENSG00000111728 |
| SFTPA2     | -4,40 | 0,24  | 4,71E-02 | ENSG00000185303 |
| SCAMP5     | 2,26  | 4,07  | 4,71E-02 | ENSG00000198794 |
| ACOT11     | -2,38 | 3,46  | 4,72E-02 | ENSG00000162390 |
| PDHB       | 1,79  | 6,28  | 4,72E-02 | ENSG00000168291 |
| DNASE1     | -1,74 | 7,29  | 4,72E-02 | ENSG00000213918 |
| AADAT      | -2,24 | 4,67  | 4,73E-02 | ENSG00000109576 |
| CAMSAP2    | -1,83 | 6,87  | 4,73E-02 | ENSG00000118200 |
| ENO2       | -1,96 | 7,38  | 4,74E-02 | ENSG00000111674 |
| LINC00924  | 3,13  | 2,06  | 4,74E-02 | ENSG00000259134 |
| RFLNA      | -2,84 | 4,85  | 4,74E-02 | ENSG00000178882 |
| HSD11B2    | 2,81  | 1,68  | 4,74E-02 | ENSG00000176387 |
| FBXW4P1    | -2,47 | 3,37  | 4,74E-02 | ENSG00000230701 |
| CTBP2P8    | -5,73 | -0,42 | 4,75E-02 | ENSG00000234383 |
| ZNF727     | -5,53 | -0,54 | 4,75E-02 | ENSG00000214652 |
| AOC1       | -5,73 | -0,42 | 4,75E-02 | ENSG00000002726 |
| C3orf22    | -5,53 | -0,54 | 4,75E-02 | ENSG00000180697 |
| AL445183.2 | -5,73 | -0,42 | 4,75E-02 | ENSG00000235563 |
| CCDC106    | 1,94  | 4,98  | 4,75E-02 | ENSG00000173581 |
| SYT6       | 2,92  | 1,11  | 4,75E-02 | ENSG00000134207 |
| ZNF106     | 1,72  | 5,97  | 4,75E-02 | ENSG00000103994 |
| MIR6730    | 5,55  | -0,64 | 4,75E-02 | ENSG00000276830 |
| ANKFN1     | -4,73 | 2,56  | 4,76E-02 | ENSG00000153930 |
| MYPN       | 3,89  | -0,11 | 4,77E-02 | ENSG00000138347 |
| EML2       | 1,97  | 4,76  | 4,77E-02 | ENSG00000125746 |
| ELFN1      | -2,28 | 3,84  | 4,77E-02 | ENSG00000225968 |
| C3orf33    | -2,65 | 1,83  | 4,77E-02 | ENSG00000174928 |
| MAN1A1     | -2,35 | 6,98  | 4,78E-02 | ENSG00000111885 |
| AC009065.3 | -3,14 | -0,04 | 4,78E-02 | ENSG00000260447 |
| VSTM5      | -2,67 | 1,37  | 4,78E-02 | ENSG00000214376 |
| LINC02210  | -1,94 | 4,88  | 4,80E-02 | ENSG00000204650 |
| SRF        | 1,99  | 6,98  | 4,80E-02 | ENSG00000112658 |
| RPL5       | 1,78  | 9,14  | 4,80E-02 | ENSG00000122406 |
| MRC1       | -2,44 | 4,36  | 4,80E-02 | ENSG00000260314 |
| ANOS2P     | -5,06 | 1,68  | 4,80E-02 | ENSG00000241859 |
| NME7       | -1,88 | 5,36  | 4,82E-02 | ENSG00000143156 |
| AC015921.1 | 3,56  | 0,31  | 4,82E-02 | ENSG00000262884 |
| AC004754.1 | -2,11 | 3,89  | 4,82E-02 | ENSG00000269881 |
| LRP1B      | -3,41 | 3,33  | 4,83E-02 | ENSG00000168702 |
| SCAT2      | -2,74 | 1,49  | 4,83E-02 | ENSG00000257596 |
| SLC7A5     | 1,84  | 6,05  | 4,83E-02 | ENSG00000103257 |
| AC105206.2 | 3,18  | -0,09 | 4,83E-02 | ENSG00000254064 |
| TMEM159    | 1,90  | 5,37  | 4,84E-02 | ENSG00000011638 |
| HMG2P3     | 3,43  | 0,15  | 4,85E-02 | ENSG00000230330 |
| FRMD4A     | 1,96  | 7,22  | 4,85E-02 | ENSG00000151474 |
| MED15P8    | -5,56 | -0,52 | 4,85E-02 | ENSG00000248796 |
| ARRDC3-AS1 | -3,13 | -0,06 | 4,86E-02 | ENSG00000281357 |
| C11orf21   | 2,59  | 3,16  | 4,86E-02 | ENSG00000110665 |
| CCDC144CP  | -2,69 | 2,36  | 4,86E-02 | ENSG00000154898 |
| CHI3L2     | 3,29  | 1,39  | 4,86E-02 | ENSG00000064886 |
| FLT3       | 3,26  | 1,38  | 4,86E-02 | ENSG00000122025 |
| MEIS3P1    | 2,61  | 1,12  | 4,86E-02 | ENSG00000179277 |
| TIAM2      | -1,83 | 5,52  | 4,86E-02 | ENSG00000146426 |
| HTRA1      | -1,74 | 8,13  | 4,87E-02 | ENSG00000166033 |
| OSGIN1     | 2,17  | 4,71  | 4,87E-02 | ENSG00000140961 |
| AC027237.3 | 2,94  | 0,84  | 4,88E-02 | ENSG00000259426 |
| PLK2       | 1,78  | 6,93  | 4,89E-02 | ENSG00000145632 |
| AL359697.1 | -3,34 | 1,84  | 4,89E-02 | ENSG00000279623 |
| HDC        | 3,26  | 4,83  | 4,91E-02 | ENSG00000140287 |
| GUCY1B1    | 1,75  | 5,27  | 4,91E-02 | ENSG00000061918 |
| BIRC6-AS1  | -5,41 | -0,61 | 4,92E-02 | ENSG00000230046 |
| LINC02600  | -3,79 | 3,87  | 4,93E-02 | ENSG00000250986 |
| SFTPD      | -2,98 | 1,75  | 4,94E-02 | ENSG00000133661 |
| FAM124B    | 2,77  | 1,32  | 4,94E-02 | ENSG00000124019 |

|            |       |       |          |                 |
|------------|-------|-------|----------|-----------------|
| SNAPC4     | -1,73 | 5,70  | 4,95E-02 | ENSG00000165684 |
| GPD1L      | 1,98  | 4,43  | 4,96E-02 | ENSG00000152642 |
| AL031846.2 | 2,19  | 3,48  | 4,96E-02 | ENSG00000279833 |
| WNT5B      | -2,30 | 4,57  | 4,96E-02 | ENSG00000111186 |
| FBXO27     | 2,59  | 2,81  | 4,97E-02 | ENSG00000161243 |
| PCDH1      | 2,11  | 3,82  | 4,97E-02 | ENSG00000156453 |
| AC131025.2 | 3,08  | -0,11 | 4,97E-02 | ENSG00000275871 |
| C6orf141   | 4,08  | 0,58  | 4,97E-02 | ENSG00000197261 |
| NPAS3      | -2,65 | 4,10  | 4,97E-02 | ENSG00000151322 |
| RHOT2      | -1,82 | 8,43  | 4,98E-02 | ENSG00000140983 |
| PBX4       | -2,19 | 3,78  | 4,98E-02 | ENSG00000105717 |
| AC132938.5 | -3,27 | 0,03  | 4,99E-02 | ENSG00000279744 |
| PCAT19     | 2,51  | 3,63  | 4,99E-02 | ENSG00000267107 |
